# Supplementary material
Source: publisher figshare collection journal article supplement (https://acs.figshare.com/ndownloader/files/5520764)
Supplement: Supplementary file 1 [file 5520764]

 
data_shelx
 
_audit_creation_method            SHELXL-2014
_chemical_name_systematic
;
 ?
;
_chemical_name_common             ?
_chemical_melting_point           ?
_chemical_formula_moiety          ?
_chemical_formula_sum
 'C22 H33 Br N2 O14 Zn2' 
_chemical_formula_weight          760.15

loop_
 _atom_type_symbol
 _atom_type_description
 _atom_type_scat_dispersion_real
 _atom_type_scat_dispersion_imag
 _atom_type_scat_source
 'C'  'C'   0.0033   0.0016
 'International Tables Vol C Tables 4.2.6.8 and 6.1.1.4'
 'H'  'H'   0.0000   0.0000
 'International Tables Vol C Tables 4.2.6.8 and 6.1.1.4'
 'Br'  'Br'  -0.2901   2.4595
 'International Tables Vol C Tables 4.2.6.8 and 6.1.1.4'
 'N'  'N'   0.0061   0.0033
 'International Tables Vol C Tables 4.2.6.8 and 6.1.1.4'
 'O'  'O'   0.0106   0.0060
 'International Tables Vol C Tables 4.2.6.8 and 6.1.1.4'
 'Zn'  'Zn'   0.2839   1.4301
 'International Tables Vol C Tables 4.2.6.8 and 6.1.1.4'
 
_space_group_crystal_system       triclinic
_space_group_IT_number            2
_space_group_name_H-M_alt         'P -1'
_space_group_name_Hall            '-P 1'
 
_shelx_space_group_comment
;
The symmetry employed for this shelxl refinement is uniquely defined
by the following loop, which should always be used as a source of
symmetry information in preference to the above space-group names.
They are only intended as comments.
;
 
loop_
 _space_group_symop_operation_xyz
 'x, y, z'
 '-x, -y, -z'
 
_cell_length_a                    9.5367(8)
_cell_length_b                    12.0547(10)
_cell_length_c                    13.1566(11)
_cell_angle_alpha                 97.977(7)
_cell_angle_beta                  94.890(7)
_cell_angle_gamma                 112.142(8)
_cell_volume                      1371.7(2)
_cell_formula_units_Z             2
_cell_measurement_temperature     293(2)
_cell_measurement_reflns_used     2833 
_cell_measurement_theta_min       2.3260 
_cell_measurement_theta_max       27.5580 
 
_exptl_crystal_description        Block 
_exptl_crystal_colour             yellow 
_exptl_crystal_density_meas       ? 
_exptl_crystal_density_method     'not measured'              
_exptl_crystal_density_diffrn     1.840          
_exptl_crystal_F_000              772
_exptl_transmission_factor_min    ?                                             
_exptl_transmission_factor_max    ?                                             
_exptl_crystal_size_max           0.2074 
_exptl_crystal_size_mid           0.1257 
_exptl_crystal_size_min           0.0992 
_exptl_absorpt_coefficient_mu     3.279
_shelx_estimated_absorpt_T_min    ? 
_shelx_estimated_absorpt_T_max    ? 
_exptl_absorpt_correction_type    'gaussian' 
_exptl_absorpt_correction_T_min   0.492 
_exptl_absorpt_correction_T_max   0.706  
_exptl_absorpt_process_details    
;
CrysAlisPro, Agilent Technologies,
Version 1.171.37.33c (release 11-04-2014 CrysAlis171 .NET)
(compiled Apr 11 2014,15:12:41)
Numerical absorption correction based on gaussian integration over
			a multifaceted crystal model
Empirical absorption correction using spherical harmonics,
 implemented in SCALE3 ABSPACK scaling algorithm.
; 
 
_exptl_special_details
;
 ?
;
 
_diffrn_ambient_temperature       293(2)
_diffrn_radiation_wavelength      0.71073
_diffrn_radiation_type            MoK\a
_diffrn_source                    'SuperNova (Mo) X-ray Source'                        
_diffrn_measurement_device_type   'SuperNova, Dual, Cu at zero, Eos' 
_diffrn_measurement_method        '\w scans' 
_diffrn_detector_area_resol_mean  7.9987 
_diffrn_reflns_number             7000
_diffrn_reflns_av_unetI/netI      0.1015
_diffrn_reflns_av_R_equivalents   0.0920
_diffrn_reflns_limit_h_min        -12
_diffrn_reflns_limit_h_max        11
_diffrn_reflns_limit_k_min        -14
_diffrn_reflns_limit_k_max        15
_diffrn_reflns_limit_l_min        -14
_diffrn_reflns_limit_l_max        17
_diffrn_reflns_theta_min          2.332
_diffrn_reflns_theta_max          28.325
_diffrn_reflns_theta_full         25.242
_diffrn_measured_fraction_theta_max   0.800
_diffrn_measured_fraction_theta_full  1
_diffrn_reflns_Laue_measured_fraction_max    0.800
_diffrn_reflns_Laue_measured_fraction_full   0.930
_diffrn_reflns_point_group_measured_fraction_max   0.800
_diffrn_reflns_point_group_measured_fraction_full  0.930
_reflns_number_total              5481
_reflns_number_gt                 3396
_reflns_threshold_expression      'I > 2\s(I)'
_reflns_Friedel_coverage          0.000
_reflns_Friedel_fraction_max      .
_reflns_Friedel_fraction_full     .
 
_reflns_special_details
;
 Reflections were merged by SHELXL according to the crystal
 class for the calculation of statistics and refinement.
 
 _reflns_Friedel_fraction is defined as the number of unique
 Friedel pairs measured divided by the number that would be
 possible theoretically, ignoring centric projections and
 systematic absences.
;
 
_computing_data_collection        
;
CrysAlisPro, Agilent Technologies,
Version 1.171.37.33c (release 11-04-2014 CrysAlis171 .NET)
(compiled Apr 11 2014,15:12:41)
;
_computing_cell_refinement        
;
CrysAlisPro, Agilent Technologies,
Version 1.171.37.33c (release 11-04-2014 CrysAlis171 .NET)
(compiled Apr 11 2014,15:12:41)
;
_computing_data_reduction         
;
CrysAlisPro, Agilent Technologies,
Version 1.171.37.33c (release 11-04-2014 CrysAlis171 .NET)
(compiled Apr 11 2014,15:12:41)
;
_computing_structure_solution     ?
_computing_structure_refinement   'SHELXL-2013 (Sheldrick, 2013)'
_computing_molecular_graphics     'Ortep for Windows (Farrugia, 2012)'
_computing_publication_material   'WinGX publication routines (Farrugia, 2012)'
 
_refine_special_details
;
 CheckCIF Alert and Discussion:

Alert level A

PLAT417_ALERT_2_A Short Inter D-H..H-D H2 .. H6 .. 1.77 Ang

PLAT417_ALERT_2_A Short Inter D-H..H-D H7 .. H12A .. 1.53 Ang


Discussion: The crystal was weakly diffracting and thus the quality of data is 
relatively poor because of these the probability of finding lesser electron density 
atoms like hydrogen is difficult for that, we fixed the hydrogen atoms manually using
olex 2 software based upon their geometrically calculated positions.
;
# SQUEEZE RESULTS (APPEND TO CIF)
# Note: Data are Listed for all Voids in the P1 Unit Cell
# i.e. Centre of Gravity, Solvent Accessible Volume,
# Recovered number of Electrons in the Void and
# Details about the Squeezed Material
loop_
  _platon_squeeze_void_nr
  _platon_squeeze_void_average_x
  _platon_squeeze_void_average_y
  _platon_squeeze_void_average_z
  _platon_squeeze_void_volume
  _platon_squeeze_void_count_electrons
  _platon_squeeze_void_content
   1  0.500  0.500  0.500        96        38 ' '

_refine_ls_structure_factor_coef  Fsqd
_refine_ls_matrix_type            full
_refine_ls_weighting_scheme       calc
_refine_ls_weighting_details
'w=1/[\s^2^(Fo^2^)+(0.0767P)^2^] where P=(Fo^2^+2Fc^2^)/3'
_atom_sites_solution_primary      ?
_atom_sites_solution_secondary    ?
_atom_sites_solution_hydrogens    mixed
_refine_ls_hydrogen_treatment     mixed
_refine_ls_extinction_method      none
_refine_ls_extinction_coef        .
_refine_ls_number_reflns          5481
_refine_ls_number_parameters      350
_refine_ls_number_restraints      2
_refine_ls_R_factor_all           0.0838
_refine_ls_R_factor_gt            0.0472
_refine_ls_wR_factor_ref          0.1548
_refine_ls_wR_factor_gt           0.1205
_refine_ls_goodness_of_fit_ref    0.996
_refine_ls_restrained_S_all       0.995
_refine_ls_shift/su_max           0.012
_refine_ls_shift/su_mean          0.001
 
loop_
 _atom_site_label
 _atom_site_type_symbol
 _atom_site_fract_x
 _atom_site_fract_y
 _atom_site_fract_z
 _atom_site_U_iso_or_equiv
 _atom_site_adp_type
 _atom_site_occupancy
 _atom_site_site_symmetry_order  
 _atom_site_calc_flag
 _atom_site_refinement_flags_posn
 _atom_site_refinement_flags_adp
 _atom_site_refinement_flags_occupancy
 _atom_site_disorder_assembly
 _atom_site_disorder_group
Zn2 Zn 0.23463(7) 0.61316(6) 0.17521(5) 0.0329(2) Uani 1 1 d . . . . .
Zn1 Zn 0.59117(7) 0.76918(6) 0.17924(5) 0.0371(2) Uani 1 1 d . . . . .
Br1 Br 0.49156(8) 0.92569(8) 0.73263(5) 0.0657(3) Uani 1 1 d . . . . .
O1 O 0.4297(4) 0.7303(3) 0.2772(3) 0.0347(9) Uani 1 1 d . . . . .
N2 N 0.1145(5) 0.5891(4) 0.2947(3) 0.0268(10) Uani 1 1 d . . . . .
N1 N 0.7522(5) 0.8870(4) 0.2961(4) 0.0307(10) Uani 1 1 d . . . . .
O7 O 0.0288(4) 0.4898(4) 0.0929(3) 0.0414(10) Uani 1 1 d D . . . .
O2 O 1.0179(5) 0.8584(4) 0.3943(4) 0.0505(12) Uani 1 1 d . . . . .
H2 H 0.9613 0.7896 0.4001 0.076 Uiso 1 1 calc R U . . .
O10 O 0.4796(4) 0.8315(4) 0.0827(3) 0.0442(10) Uani 1 1 d . . . . .
O5 O 0.0180(5) 0.3713(4) 0.3869(3) 0.0501(11) Uani 1 1 d . . . . .
H5 H 0.1037 0.3707 0.3967 0.075 Uiso 1 1 calc R U . . .
O4 O 0.7795(5) 0.8346(5) 0.0981(4) 0.0511(14) Uani 1 1 d . . . . .
O6 O -0.1797(5) 0.6107(4) 0.3266(4) 0.0567(13) Uani 1 1 d . . . . .
H6 H -0.1846 0.6417 0.3850 0.085 Uiso 1 1 calc R U . . .
C7 C 0.7297(6) 0.9099(5) 0.3896(4) 0.0332(13) Uani 1 1 d . . . . .
H7A H 0.8142 0.9651 0.4361 0.040 Uiso 1 1 calc R U . . .
O11 O 0.2325(5) 0.7357(4) 0.0914(3) 0.0524(12) Uani 1 1 d . . . . .
C4 C 0.4427(6) 0.7739(5) 0.3748(4) 0.0317(13) Uani 1 1 d . . . . .
C8 C 0.9078(6) 0.9464(5) 0.2703(4) 0.0330(13) Uani 1 1 d . . . . .
O3 O 1.1223(6) 1.1330(5) 0.2839(4) 0.0766(17) Uani 1 1 d . . . . .
H3 H 1.1840 1.1919 0.3254 0.115 Uiso 1 1 calc R U . . .
C6 C 0.3330(6) 0.7828(5) 0.5367(4) 0.0338(13) Uani 1 1 d . . . . .
H6A H 0.2494 0.7584 0.5722 0.041 Uiso 1 1 calc R U . . .
C2 C 0.5968(6) 0.9031(5) 0.5389(4) 0.0353(13) Uani 1 1 d . . . . .
H2A H 0.6901 0.9591 0.5758 0.042 Uiso 1 1 calc R U . . .
C5 C 0.3152(6) 0.7356(5) 0.4313(4) 0.0304(12) Uani 1 1 d . . . . .
C12 C 0.1627(6) 0.6451(5) 0.3891(4) 0.0319(13) Uani 1 1 d . . . . .
H12 H 0.0926 0.6257 0.4354 0.038 Uiso 1 1 calc R U . . .
C14 C -0.1593(6) 0.5015(5) 0.3307(5) 0.0391(14) Uani 1 1 d . . . . .
H14A H -0.2559 0.4330 0.3052 0.047 Uiso 1 1 calc R U . . .
H14B H -0.1290 0.4990 0.4023 0.047 Uiso 1 1 calc R U . . .
C3 C 0.5862(6) 0.8594(5) 0.4327(4) 0.0314(13) Uani 1 1 d . . . . .
O9 O 0.5759(5) 0.5996(4) 0.1437(4) 0.0668(15) Uani 1 1 d . . . . .
O8 O 0.3268(5) 0.4973(4) 0.1271(4) 0.0690(16) Uani 1 1 d . . . . .
C13 C -0.0390(6) 0.4891(5) 0.2667(4) 0.0306(12) Uani 1 1 d . . . . .
C1 C 0.4723(7) 0.8647(6) 0.5888(4) 0.0422(16) Uani 1 1 d . . . . .
C10 C 1.0011(7) 0.8708(6) 0.2898(5) 0.0456(16) Uani 1 1 d . . . . .
H10A H 0.9510 0.7906 0.2465 0.055 Uiso 1 1 calc R U . . .
H10B H 1.1016 0.9094 0.2702 0.055 Uiso 1 1 calc R U . . .
C19 C 0.4581(8) 0.5021(6) 0.1307(5) 0.0418(15) Uani 1 1 d . . . . .
C15 C -0.0910(6) 0.4838(6) 0.1505(5) 0.0479(17) Uani 1 1 d D . . . .
H15A H -0.1793 0.4086 0.1237 0.057 Uiso 1 1 calc R U . . .
H15B H -0.1206 0.5513 0.1435 0.057 Uiso 1 1 calc R U . . .
C17 C 0.3414(7) 0.8138(5) 0.0611(5) 0.0408(15) Uani 1 1 d . . . . .
C16 C -0.0209(7) 0.3721(5) 0.2808(5) 0.0407(15) Uani 1 1 d . . . . .
H16A H -0.1160 0.3031 0.2524 0.049 Uiso 1 1 calc R U . . .
H16B H 0.0584 0.3638 0.2428 0.049 Uiso 1 1 calc R U . . .
C9 C 0.9897(7) 1.0767(6) 0.3294(6) 0.0503(18) Uani 1 1 d . . . . .
H9A H 0.9231 1.1205 0.3249 0.060 Uiso 1 1 calc R U . . .
H9B H 1.0184 1.0771 0.4021 0.060 Uiso 1 1 calc R U . . .
C18 C 0.3025(8) 0.8921(7) -0.0054(6) 0.071(2) Uani 1 1 d . . . . .
H18A H 0.3666 0.9054 -0.0587 0.106 Uiso 1 1 calc R U . . .
H18B H 0.3189 0.9690 0.0365 0.106 Uiso 1 1 calc R U . . .
H18C H 0.1971 0.8522 -0.0367 0.106 Uiso 1 1 calc R U . . .
C11 C 0.8854(7) 0.9488(6) 0.1536(5) 0.0487(17) Uani 1 1 d . . . . .
H11A H 0.8484 1.0115 0.1425 0.058 Uiso 1 1 calc R U . . .
H11B H 0.9828 0.9684 0.1282 0.058 Uiso 1 1 calc R U . . .
C20 C 0.4778(9) 0.3844(7) 0.1167(6) 0.072(2) Uani 1 1 d . . . . .
H20A H 0.5065 0.3690 0.0497 0.107 Uiso 1 1 calc R U . . .
H20B H 0.3832 0.3197 0.1219 0.107 Uiso 1 1 calc R U . . .
H20C H 0.5564 0.3887 0.1697 0.107 Uiso 1 1 calc R U . . .
O12 O 0.9333(7) 0.7206(6) 0.0077(5) 0.088(2) Uani 1 1 d G . . . .
H12A H 0.9106 0.6447 -0.0099 0.132 Uiso 1 1 d G U . . .
H12B H 0.9009 0.7466 -0.0425 0.132 Uiso 1 1 d G U . . .
H7 H -0.004(4) 0.435(6) 0.039(4) 0.132 Uiso 1 1 d D U . . .
H4 H 0.821(8) 0.801(6) 0.086(6) 0.05(3) Uiso 1 1 d . . . . .
 
loop_
 _atom_site_aniso_label
 _atom_site_aniso_U_11
 _atom_site_aniso_U_22
 _atom_site_aniso_U_33
 _atom_site_aniso_U_23
 _atom_site_aniso_U_13
 _atom_site_aniso_U_12
Zn2 0.0245(3) 0.0373(4) 0.0287(4) 0.0025(3) 0.0046(3) 0.0042(3)
Zn1 0.0236(3) 0.0444(4) 0.0324(4) -0.0006(3) 0.0025(3) 0.0043(3)
Br1 0.0609(5) 0.0857(6) 0.0308(4) -0.0158(4) 0.0023(3) 0.0173(4)
O1 0.0242(18) 0.046(2) 0.021(2) -0.0035(17) 0.0040(15) 0.0027(17)
N2 0.027(2) 0.025(2) 0.024(2) 0.0063(18) 0.0018(18) 0.0050(19)
N1 0.021(2) 0.031(2) 0.034(3) 0.003(2) 0.0003(19) 0.005(2)
O7 0.034(2) 0.047(3) 0.025(2) -0.0006(18) 0.0031(17) -0.0012(19)
O2 0.046(3) 0.048(3) 0.056(3) 0.009(2) -0.011(2) 0.021(2)
O10 0.035(2) 0.058(3) 0.040(3) 0.022(2) 0.0069(19) 0.014(2)
O5 0.055(3) 0.049(3) 0.049(3) 0.017(2) 0.006(2) 0.022(3)
O4 0.030(2) 0.068(3) 0.041(3) -0.002(2) 0.007(2) 0.007(2)
O6 0.054(3) 0.051(3) 0.073(4) 0.016(2) 0.026(3) 0.024(2)
C7 0.026(3) 0.033(3) 0.034(3) -0.001(2) -0.005(2) 0.008(2)
O11 0.034(2) 0.059(3) 0.053(3) 0.017(2) -0.002(2) 0.005(2)
C4 0.028(3) 0.032(3) 0.030(3) 0.000(2) 0.003(2) 0.008(2)
C8 0.019(3) 0.032(3) 0.041(3) 0.003(2) 0.001(2) 0.005(2)
O3 0.052(3) 0.053(3) 0.093(4) -0.002(3) 0.023(3) -0.013(2)
C6 0.039(3) 0.033(3) 0.027(3) 0.004(2) 0.006(2) 0.012(3)
C2 0.033(3) 0.039(3) 0.028(3) 0.002(2) -0.005(2) 0.010(3)
C5 0.026(3) 0.028(3) 0.031(3) 0.001(2) 0.001(2) 0.007(2)
C12 0.026(3) 0.029(3) 0.037(3) 0.005(2) 0.010(2) 0.006(2)
C14 0.032(3) 0.034(3) 0.043(4) 0.010(3) 0.010(3) 0.003(3)
C3 0.024(3) 0.032(3) 0.031(3) 0.001(2) 0.002(2) 0.005(2)
O9 0.055(3) 0.051(3) 0.091(4) -0.002(3) 0.030(3) 0.018(3)
O8 0.043(3) 0.062(3) 0.089(4) -0.033(3) -0.016(2) 0.027(2)
C13 0.026(3) 0.034(3) 0.025(3) 0.002(2) 0.003(2) 0.006(2)
C1 0.039(3) 0.046(4) 0.028(3) -0.014(3) 0.001(3) 0.011(3)
C10 0.033(3) 0.041(4) 0.055(4) -0.004(3) 0.002(3) 0.012(3)
C19 0.049(4) 0.046(4) 0.031(3) 0.000(3) -0.002(3) 0.024(3)
C15 0.025(3) 0.059(4) 0.041(4) 0.001(3) 0.003(3) 0.000(3)
C17 0.042(4) 0.039(3) 0.033(3) 0.011(3) 0.003(3) 0.007(3)
C16 0.043(3) 0.035(3) 0.034(3) 0.002(3) 0.003(3) 0.006(3)
C9 0.033(3) 0.038(3) 0.064(5) -0.001(3) 0.009(3) 0.001(3)
C18 0.051(4) 0.072(5) 0.086(6) 0.048(5) -0.008(4) 0.012(4)
C11 0.029(3) 0.048(4) 0.057(4) 0.000(3) 0.007(3) 0.005(3)
C20 0.061(5) 0.060(5) 0.084(6) -0.007(4) -0.005(4) 0.024(4)
O12 0.066(4) 0.073(4) 0.113(5) -0.021(3) 0.010(3) 0.029(3)
 
_geom_special_details
;
 All esds (except the esd in the dihedral angle between two l.s. planes)
 are estimated using the full covariance matrix.  The cell esds are taken
 into account individually in the estimation of esds in distances, angles
 and torsion angles; correlations between esds in cell parameters are only
 used when they are defined by crystal symmetry.  An approximate (isotropic)
 treatment of cell esds is used for estimating esds involving l.s. planes.
;
 
loop_
 _geom_bond_atom_site_label_1
 _geom_bond_atom_site_label_2
 _geom_bond_distance
 _geom_bond_site_symmetry_2
 _geom_bond_publ_flag
Zn2 O11 1.967(5) . ?
Zn2 O8 1.974(4) . ?
Zn2 N2 2.013(4) . ?
Zn2 O7 2.056(4) . ?
Zn2 O1 2.079(3) . ?
Zn1 O9 1.979(5) . ?
Zn1 O10 1.986(4) . ?
Zn1 N1 2.022(4) . ?
Zn1 O1 2.053(3) . ?
Zn1 O4 2.116(5) . ?
Br1 C1 1.899(5) . ?
O1 C4 1.295(6) . ?
N2 C12 1.282(6) . ?
N2 C13 1.478(6) . ?
N1 C7 1.276(7) . ?
N1 C8 1.478(6) . ?
O7 C15 1.409(6) . ?
O7 H7 0.848(10) . ?
O2 C10 1.406(8) . ?
O2 H2 0.8200 . ?
O10 C17 1.253(7) . ?
O5 C16 1.417(7) . ?
O5 H5 0.8200 . ?
O4 C11 1.412(7) . ?
O4 H4 0.68(6) . ?
O6 C14 1.408(7) . ?
O6 H6 0.8200 . ?
C7 C3 1.472(7) . ?
C7 H7A 0.9300 . ?
O11 C17 1.249(7) . ?
C4 C3 1.433(7) . ?
C4 C5 1.439(7) . ?
C8 C9 1.522(7) . ?
C8 C10 1.524(8) . ?
C8 C11 1.538(9) . ?
O3 C9 1.418(7) . ?
O3 H3 0.8200 . ?
C6 C1 1.370(7) . ?
C6 C5 1.395(7) . ?
C6 H6A 0.9300 . ?
C2 C1 1.363(8) . ?
C2 C3 1.405(7) . ?
C2 H2A 0.9300 . ?
C5 C12 1.453(7) . ?
C12 H12 0.9300 . ?
C14 C13 1.518(7) . ?
C14 H14A 0.9700 . ?
C14 H14B 0.9700 . ?
O9 C19 1.261(7) . ?
O8 C19 1.228(7) . ?
C13 C16 1.518(8) . ?
C13 C15 1.552(8) . ?
C10 H10A 0.9700 . ?
C10 H10B 0.9700 . ?
C19 C20 1.488(9) . ?
C15 H15A 0.9700 . ?
C15 H15B 0.9700 . ?
C17 C18 1.494(9) . ?
C16 H16A 0.9700 . ?
C16 H16B 0.9700 . ?
C9 H9A 0.9700 . ?
C9 H9B 0.9700 . ?
C18 H18A 0.9600 . ?
C18 H18B 0.9600 . ?
C18 H18C 0.9600 . ?
C11 H11A 0.9700 . ?
C11 H11B 0.9700 . ?
C20 H20A 0.9600 . ?
C20 H20B 0.9600 . ?
C20 H20C 0.9600 . ?
O12 H12A 0.8493 . ?
O12 H12B 0.8518 . ?
 
loop_
 _geom_angle_atom_site_label_1
 _geom_angle_atom_site_label_2
 _geom_angle_atom_site_label_3
 _geom_angle
 _geom_angle_site_symmetry_1
 _geom_angle_site_symmetry_3
 _geom_angle_publ_flag
O11 Zn2 O8 119.0(2) . . ?
O11 Zn2 N2 119.93(18) . . ?
O8 Zn2 N2 120.3(2) . . ?
O11 Zn2 O7 91.04(18) . . ?
O8 Zn2 O7 88.17(17) . . ?
N2 Zn2 O7 82.23(16) . . ?
O11 Zn2 O1 94.73(17) . . ?
O8 Zn2 O1 94.07(16) . . ?
N2 Zn2 O1 89.86(15) . . ?
O7 Zn2 O1 171.82(15) . . ?
O9 Zn1 O10 119.5(2) . . ?
O9 Zn1 N1 119.6(2) . . ?
O10 Zn1 N1 119.69(18) . . ?
O9 Zn1 O1 94.85(18) . . ?
O10 Zn1 O1 95.20(16) . . ?
N1 Zn1 O1 91.00(16) . . ?
O9 Zn1 O4 91.9(2) . . ?
O10 Zn1 O4 87.38(19) . . ?
N1 Zn1 O4 79.70(17) . . ?
O1 Zn1 O4 170.38(16) . . ?
C4 O1 Zn1 129.4(3) . . ?
C4 O1 Zn2 129.0(3) . . ?
Zn1 O1 Zn2 101.37(14) . . ?
C12 N2 C13 120.1(4) . . ?
C12 N2 Zn2 126.4(4) . . ?
C13 N2 Zn2 113.3(3) . . ?
C7 N1 C8 118.7(4) . . ?
C7 N1 Zn1 124.9(4) . . ?
C8 N1 Zn1 116.4(3) . . ?
C15 O7 Zn2 110.3(3) . . ?
C15 O7 H7 110(2) . . ?
Zn2 O7 H7 139(2) . . ?
C10 O2 H2 109.5 . . ?
C17 O10 Zn1 133.5(4) . . ?
C16 O5 H5 109.5 . . ?
C11 O4 Zn1 109.4(4) . . ?
C11 O4 H4 106(6) . . ?
Zn1 O4 H4 121(7) . . ?
C14 O6 H6 109.5 . . ?
N1 C7 C3 127.8(5) . . ?
N1 C7 H7A 116.1 . . ?
C3 C7 H7A 116.1 . . ?
C17 O11 Zn2 129.4(4) . . ?
O1 C4 C3 121.6(5) . . ?
O1 C4 C5 121.6(5) . . ?
C3 C4 C5 116.8(5) . . ?
N1 C8 C9 112.2(4) . . ?
N1 C8 C10 110.2(5) . . ?
C9 C8 C10 111.0(5) . . ?
N1 C8 C11 105.5(4) . . ?
C9 C8 C11 108.7(5) . . ?
C10 C8 C11 109.1(5) . . ?
C9 O3 H3 109.5 . . ?
C1 C6 C5 120.8(5) . . ?
C1 C6 H6A 119.6 . . ?
C5 C6 H6A 119.6 . . ?
C1 C2 C3 120.9(5) . . ?
C1 C2 H2A 119.5 . . ?
C3 C2 H2A 119.5 . . ?
C6 C5 C4 120.4(5) . . ?
C6 C5 C12 114.0(5) . . ?
C4 C5 C12 125.6(5) . . ?
N2 C12 C5 126.9(5) . . ?
N2 C12 H12 116.5 . . ?
C5 C12 H12 116.5 . . ?
O6 C14 C13 112.3(5) . . ?
O6 C14 H14A 109.1 . . ?
C13 C14 H14A 109.1 . . ?
O6 C14 H14B 109.1 . . ?
C13 C14 H14B 109.1 . . ?
H14A C14 H14B 107.9 . . ?
C2 C3 C4 120.1(5) . . ?
C2 C3 C7 114.7(5) . . ?
C4 C3 C7 125.2(5) . . ?
C19 O9 Zn1 128.3(4) . . ?
C19 O8 Zn2 134.8(4) . . ?
N2 C13 C16 107.3(4) . . ?
N2 C13 C14 115.5(4) . . ?
C16 C13 C14 107.9(5) . . ?
N2 C13 C15 106.2(4) . . ?
C16 C13 C15 110.0(5) . . ?
C14 C13 C15 109.9(5) . . ?
C2 C1 C6 121.0(5) . . ?
C2 C1 Br1 119.7(4) . . ?
C6 C1 Br1 119.3(4) . . ?
O2 C10 C8 112.2(5) . . ?
O2 C10 H10A 109.2 . . ?
C8 C10 H10A 109.2 . . ?
O2 C10 H10B 109.2 . . ?
C8 C10 H10B 109.2 . . ?
H10A C10 H10B 107.9 . . ?
O8 C19 O9 124.2(6) . . ?
O8 C19 C20 117.4(6) . . ?
O9 C19 C20 118.4(6) . . ?
O7 C15 C13 110.2(5) . . ?
O7 C15 H15A 109.6 . . ?
C13 C15 H15A 109.6 . . ?
O7 C15 H15B 109.6 . . ?
C13 C15 H15B 109.6 . . ?
H15A C15 H15B 108.1 . . ?
O11 C17 O10 125.1(6) . . ?
O11 C17 C18 116.9(6) . . ?
O10 C17 C18 118.0(6) . . ?
O5 C16 C13 111.3(4) . . ?
O5 C16 H16A 109.4 . . ?
C13 C16 H16A 109.4 . . ?
O5 C16 H16B 109.4 . . ?
C13 C16 H16B 109.4 . . ?
H16A C16 H16B 108.0 . . ?
O3 C9 C8 107.6(5) . . ?
O3 C9 H9A 110.2 . . ?
C8 C9 H9A 110.2 . . ?
O3 C9 H9B 110.2 . . ?
C8 C9 H9B 110.2 . . ?
H9A C9 H9B 108.5 . . ?
C17 C18 H18A 109.5 . . ?
C17 C18 H18B 109.5 . . ?
H18A C18 H18B 109.5 . . ?
C17 C18 H18C 109.5 . . ?
H18A C18 H18C 109.5 . . ?
H18B C18 H18C 109.5 . . ?
O4 C11 C8 110.5(5) . . ?
O4 C11 H11A 109.5 . . ?
C8 C11 H11A 109.5 . . ?
O4 C11 H11B 109.5 . . ?
C8 C11 H11B 109.5 . . ?
H11A C11 H11B 108.1 . . ?
C19 C20 H20A 109.5 . . ?
C19 C20 H20B 109.5 . . ?
H20A C20 H20B 109.5 . . ?
C19 C20 H20C 109.5 . . ?
H20A C20 H20C 109.5 . . ?
H20B C20 H20C 109.5 . . ?
H12A O12 H12B 109.4 . . ?
 
loop_
 _geom_torsion_atom_site_label_1
 _geom_torsion_atom_site_label_2
 _geom_torsion_atom_site_label_3
 _geom_torsion_atom_site_label_4
 _geom_torsion
 _geom_torsion_site_symmetry_1
 _geom_torsion_site_symmetry_2
 _geom_torsion_site_symmetry_3
 _geom_torsion_site_symmetry_4
 _geom_torsion_publ_flag
C8 N1 C7 C3 -178.6(5) . . . . ?
Zn1 N1 C7 C3 -1.0(9) . . . . ?
Zn1 O1 C4 C3 -2.5(8) . . . . ?
Zn2 O1 C4 C3 -176.7(4) . . . . ?
Zn1 O1 C4 C5 179.8(4) . . . . ?
Zn2 O1 C4 C5 5.6(8) . . . . ?
C7 N1 C8 C9 -37.3(8) . . . . ?
Zn1 N1 C8 C9 145.0(4) . . . . ?
C7 N1 C8 C10 86.9(6) . . . . ?
Zn1 N1 C8 C10 -90.8(5) . . . . ?
C7 N1 C8 C11 -155.5(5) . . . . ?
Zn1 N1 C8 C11 26.8(5) . . . . ?
C1 C6 C5 C4 -1.1(9) . . . . ?
C1 C6 C5 C12 176.8(5) . . . . ?
O1 C4 C5 C6 179.1(5) . . . . ?
C3 C4 C5 C6 1.2(8) . . . . ?
O1 C4 C5 C12 1.5(9) . . . . ?
C3 C4 C5 C12 -176.4(5) . . . . ?
C13 N2 C12 C5 173.0(5) . . . . ?
Zn2 N2 C12 C5 -1.8(8) . . . . ?
C6 C5 C12 N2 178.7(5) . . . . ?
C4 C5 C12 N2 -3.6(9) . . . . ?
C1 C2 C3 C4 0.5(9) . . . . ?
C1 C2 C3 C7 179.6(6) . . . . ?
O1 C4 C3 C2 -178.8(5) . . . . ?
C5 C4 C3 C2 -0.9(8) . . . . ?
O1 C4 C3 C7 2.2(9) . . . . ?
C5 C4 C3 C7 -179.9(5) . . . . ?
N1 C7 C3 C2 -179.4(6) . . . . ?
N1 C7 C3 C4 -0.4(10) . . . . ?
C12 N2 C13 C16 -88.3(5) . . . . ?
Zn2 N2 C13 C16 87.1(4) . . . . ?
C12 N2 C13 C14 32.0(7) . . . . ?
Zn2 N2 C13 C14 -152.6(4) . . . . ?
C12 N2 C13 C15 154.1(5) . . . . ?
Zn2 N2 C13 C15 -30.5(5) . . . . ?
O6 C14 C13 N2 57.3(7) . . . . ?
O6 C14 C13 C16 177.3(5) . . . . ?
O6 C14 C13 C15 -62.8(6) . . . . ?
C3 C2 C1 C6 -0.3(9) . . . . ?
C3 C2 C1 Br1 179.9(4) . . . . ?
C5 C6 C1 C2 0.6(9) . . . . ?
C5 C6 C1 Br1 -179.6(4) . . . . ?
N1 C8 C10 O2 -60.9(6) . . . . ?
C9 C8 C10 O2 64.0(6) . . . . ?
C11 C8 C10 O2 -176.3(5) . . . . ?
Zn2 O8 C19 O9 -20.9(12) . . . . ?
Zn2 O8 C19 C20 160.2(5) . . . . ?
Zn1 O9 C19 O8 8.4(10) . . . . ?
Zn1 O9 C19 C20 -172.7(5) . . . . ?
Zn2 O7 C15 C13 -39.9(6) . . . . ?
N2 C13 C15 O7 46.0(6) . . . . ?
C16 C13 C15 O7 -69.8(6) . . . . ?
C14 C13 C15 O7 171.6(5) . . . . ?
Zn2 O11 C17 O10 -2.6(9) . . . . ?
Zn2 O11 C17 C18 177.8(5) . . . . ?
Zn1 O10 C17 O11 -8.5(10) . . . . ?
Zn1 O10 C17 C18 171.0(5) . . . . ?
N2 C13 C16 O5 68.3(5) . . . . ?
C14 C13 C16 O5 -56.8(6) . . . . ?
C15 C13 C16 O5 -176.6(4) . . . . ?
N1 C8 C9 O3 -168.0(5) . . . . ?
C10 C8 C9 O3 68.3(7) . . . . ?
C11 C8 C9 O3 -51.6(7) . . . . ?
Zn1 O4 C11 C8 43.4(6) . . . . ?
N1 C8 C11 O4 -45.6(6) . . . . ?
C9 C8 C11 O4 -166.1(5) . . . . ?
C10 C8 C11 O4 72.8(6) . . . . ?
 
loop_
 _geom_hbond_atom_site_label_D 
 _geom_hbond_atom_site_label_H 
 _geom_hbond_atom_site_label_A 
 _geom_hbond_distance_DH 
 _geom_hbond_distance_HA 
 _geom_hbond_distance_DA 
 _geom_hbond_angle_DHA 
 _geom_hbond_site_symmetry_A 
O7 H7 O11  0.848(10) 2.63(2) 3.394(6) 151(3) 2_565
O7 H7 O12  0.848(10) 2.25(7) 2.857(7) 128(7) 2_665
O2 H2 O6  0.82 2.10 2.828(7) 147.9 1_655
C6 H6A O5  0.93 2.59 3.474(7) 159.4 2_566
C12 H12 O5  0.93 2.65 3.531(7) 159.1 2_566
C10 H10A O6  0.97 2.49 3.087(8) 119.8 1_655
C18 H18A Br1  0.96 3.09 4.024(8) 165.0 1_554
C18 H18C O12  0.96 2.59 3.379(10) 140.1 1_455
O12 H12A O7  0.85 2.12 2.857(7) 145.4 2_665
O12 H12A O8  0.85 2.49 3.040(7) 123.6 2_665
O4 H4 O12  0.68(6) 1.96(6) 2.611(8) 161(9) .
 
_refine_diff_density_max    1.063
_refine_diff_density_min   -0.811
_refine_diff_density_rms    0.143

_shelxl_version_number 2014-1

_shelx_res_file
;
TITL SBL_120_RT_MO in P-1 #2
CELL  0.71073   9.5367  12.0547  13.1566   97.977   94.890  112.142
ZERR     2.00   0.0008   0.0010   0.0011    0.007    0.007    0.008
LATT   1
SFAC  C    H    BR   N    O    ZN
UNIT  44   66   2    4    28   4
MERG   2
OMIT     1  -2   1
OMIT    -1  -4   4
OMIT     1  -1   4
OMIT    -1  -5   5
OMIT     0  -5   3
OMIT    -1  -6  11
OMIT    -1  -6   6
OMIT    -1  -7   8
OMIT     5  -4   7
DFIX 0.85 0.01 O7 H7
DANG 1.875052 0.02 C15 H7
EQIV $1 -x, -y+1, -z
HTAB O7 O11_$1
EQIV $2 -x+1, -y+1, -z
HTAB O7 O12_$2
EQIV $3 x+1, y, z
HTAB O2 O6_$3
EQIV $4 -x, -y+1, -z+1
HTAB C6 O5_$4
HTAB C12 O5_$4
HTAB C10 O6_$3
EQIV $5 x, y, z-1
HTAB C18 Br1_$5
EQIV $6 x-1, y, z
HTAB C18 O12_$6
HTAB O12 O7_$2
HTAB O12 O8_$2
HTAB O4 O12
FMAP   2
PLAN   36
ACTA  50
HTAB    2.00000
BOND   $H
CONF
L.S.   1
WGHT    0.076700
FVAR       4.34993
ZN2   6    0.234626    0.613160    0.175212    11.00000    0.02455    0.03728 =
         0.02869    0.00249    0.00463    0.00423
ZN1   6    0.591165    0.769183    0.179236    11.00000    0.02360    0.04445 =
         0.03241   -0.00059    0.00252    0.00428
BR1   3    0.491555    0.925689    0.732631    11.00000    0.06093    0.08569 =
         0.03082   -0.01575    0.00232    0.01726
O1    5    0.429694    0.730309    0.277220    11.00000    0.02416    0.04571 =
         0.02121   -0.00350    0.00400    0.00269
N2    4    0.114496    0.589057    0.294727    11.00000    0.02658    0.02513 =
         0.02415    0.00629    0.00180    0.00503
N1    4    0.752179    0.887045    0.296147    11.00000    0.02117    0.03067 =
         0.03433    0.00290    0.00034    0.00540
O7    5    0.028790    0.489846    0.092913    11.00000    0.03384    0.04732 =
         0.02504   -0.00062    0.00309   -0.00121
O2    5    1.017868    0.858417    0.394294    11.00000    0.04591    0.04795 =
         0.05624    0.00913   -0.01113    0.02091
AFIX 147
H2    2    0.961285    0.789591    0.400081    11.00000   -1.50000
AFIX   0
O10   5    0.479608    0.831466    0.082714    11.00000    0.03494    0.05808 =
         0.03950    0.02222    0.00692    0.01356
O5    5    0.017993    0.371283    0.386942    11.00000    0.05525    0.04942 =
         0.04872    0.01691    0.00589    0.02162
AFIX 147
H5    2    0.103749    0.370656    0.396701    11.00000   -1.50000
AFIX   0
O4    5    0.779504    0.834604    0.098147    11.00000    0.03000    0.06785 =
         0.04068   -0.00199    0.00684    0.00671
O6    5   -0.179706    0.610677    0.326558    11.00000    0.05366    0.05122 =
         0.07336    0.01648    0.02612    0.02437
AFIX 147
H6    2   -0.184553    0.641700    0.384996    11.00000   -1.50000
AFIX   0
C7    1    0.729728    0.909912    0.389596    11.00000    0.02595    0.03274 =
         0.03374   -0.00099   -0.00475    0.00795
AFIX  43
H7A   2    0.814244    0.965114    0.436056    11.00000   -1.20000
AFIX   0
O11   5    0.232542    0.735745    0.091443    11.00000    0.03379    0.05911 =
         0.05284    0.01723   -0.00168    0.00504
C4    1    0.442740    0.773924    0.374825    11.00000    0.02821    0.03193 =
         0.02959   -0.00010    0.00283    0.00837
C8    1    0.907828    0.946375    0.270315    11.00000    0.01919    0.03227 =
         0.04103    0.00259    0.00134    0.00498
O3    5    1.122253    1.132967    0.283869    11.00000    0.05159    0.05317 =
         0.09280   -0.00159    0.02346   -0.01263
AFIX 147
H3    2    1.183954    1.191938    0.325419    11.00000   -1.50000
AFIX   0
C6    1    0.333040    0.782794    0.536748    11.00000    0.03909    0.03301 =
         0.02693    0.00444    0.00560    0.01190
AFIX  43
H6A   2    0.249366    0.758365    0.572161    11.00000   -1.20000
AFIX   0
C2    1    0.596828    0.903121    0.538930    11.00000    0.03270    0.03853 =
         0.02754    0.00218   -0.00503    0.00964
AFIX  43
H2A   2    0.690144    0.959064    0.575755    11.00000   -1.20000
AFIX   0
C5    1    0.315174    0.735608    0.431268    11.00000    0.02615    0.02816 =
         0.03122    0.00057    0.00076    0.00689
C12   1    0.162716    0.645061    0.389065    11.00000    0.02648    0.02872 =
         0.03663    0.00478    0.00980    0.00609
AFIX  43
H12   2    0.092633    0.625660    0.435437    11.00000   -1.20000
AFIX   0
C14   1   -0.159270    0.501538    0.330661    11.00000    0.03244    0.03383 =
         0.04334    0.00953    0.00961    0.00306
AFIX  23
H14A  2   -0.255908    0.432992    0.305186    11.00000   -1.20000
H14B  2   -0.128980    0.499020    0.402302    11.00000   -1.20000
AFIX   0
C3    1    0.586171    0.859427    0.432672    11.00000    0.02410    0.03192 =
         0.03092    0.00104    0.00196    0.00517
O9    5    0.575931    0.599632    0.143694    11.00000    0.05507    0.05067 =
         0.09056   -0.00250    0.02980    0.01770
O8    5    0.326812    0.497328    0.127078    11.00000    0.04256    0.06159 =
         0.08931   -0.03310   -0.01596    0.02719
C13   1   -0.038985    0.489098    0.266721    11.00000    0.02601    0.03414 =
         0.02475    0.00176    0.00274    0.00560
C1    1    0.472347    0.864687    0.588821    11.00000    0.03909    0.04636 =
         0.02846   -0.01412    0.00074    0.01082
C10   1    1.001079    0.870838    0.289797    11.00000    0.03284    0.04088 =
         0.05550   -0.00446    0.00156    0.01180
AFIX  23
H10A  2    0.950967    0.790615    0.246452    11.00000   -1.20000
H10B  2    1.101573    0.909391    0.270173    11.00000   -1.20000
AFIX   0
C19   1    0.458123    0.502064    0.130667    11.00000    0.04914    0.04614 =
         0.03141    0.00046   -0.00192    0.02418
C15   1   -0.091042    0.483790    0.150512    11.00000    0.02500    0.05937 =
         0.04119    0.00097    0.00279   -0.00011
AFIX  23
H15A  2   -0.179344    0.408565    0.123683    11.00000   -1.20000
H15B  2   -0.120645    0.551340    0.143518    11.00000   -1.20000
AFIX   0
C17   1    0.341408    0.813785    0.061122    11.00000    0.04242    0.03937 =
         0.03335    0.01059    0.00297    0.00737
C16   1   -0.020920    0.372102    0.280785    11.00000    0.04331    0.03495 =
         0.03394    0.00234    0.00291    0.00639
AFIX  23
H16A  2   -0.115999    0.303095    0.252441    11.00000   -1.20000
H16B  2    0.058426    0.363775    0.242754    11.00000   -1.20000
AFIX   0
C9    1    0.989734    1.076749    0.329429    11.00000    0.03349    0.03820 =
         0.06400   -0.00134    0.00949    0.00063
AFIX  23
H9A   2    0.923107    1.120529    0.324877    11.00000   -1.20000
H9B   2    1.018358    1.077119    0.402052    11.00000   -1.20000
AFIX   0
C18   1    0.302504    0.892096   -0.005374    11.00000    0.05067    0.07191 =
         0.08598    0.04792   -0.00750    0.01174
AFIX 137
H18A  2    0.366567    0.905385   -0.058697    11.00000   -1.50000
H18B  2    0.318864    0.968971    0.036528    11.00000   -1.50000
H18C  2    0.197082    0.852250   -0.036679    11.00000   -1.50000
AFIX   0
C11   1    0.885431    0.948772    0.153626    11.00000    0.02882    0.04795 =
         0.05725   -0.00018    0.00724    0.00500
AFIX  23
H11A  2    0.848399    1.011495    0.142523    11.00000   -1.20000
H11B  2    0.982850    0.968379    0.128150    11.00000   -1.20000
AFIX   0
C20   1    0.477803    0.384424    0.116733    11.00000    0.06149    0.06022 =
         0.08408   -0.00738   -0.00466    0.02444
AFIX 137
H20A  2    0.506505    0.369006    0.049686    11.00000   -1.50000
H20B  2    0.383205    0.319692    0.121852    11.00000   -1.50000
H20C  2    0.556394    0.388679    0.169672    11.00000   -1.50000
AFIX   6
O12   5    0.933257    0.720580    0.007721    11.00000    0.06594    0.07336 =
         0.11301   -0.02074    0.01026    0.02902
H12A  2    0.910608    0.644665   -0.009858    11.00000   -1.50000
H12B  2    0.900861    0.746588   -0.042471    11.00000   -1.50000
AFIX   0
H7    2   -0.004431    0.435064    0.038689    11.00000   -1.50000
H4    2    0.820838    0.800521    0.085767    11.00000    0.04708
HKLF    4

REM  SBL_120_RT_MO in P-1 #2
REM R1 =  0.0472 for    3396 Fo > 4sig(Fo)  and  0.0838 for all    5481 data
REM    350 parameters refined using      2 restraints

END

WGHT      0.0762      0.0000

REM Instructions for potential hydrogen bonds
HTAB O2 O6_$3
HTAB C6 O5_$4
HTAB C12 O5_$4
HTAB C10 O6_$3
HTAB C18 Br1_$5
HTAB C18 O12_$6
HTAB O12 O7_$2
HTAB O12 O8_$2
HTAB O7 O11_$1
HTAB O7 O12_$2
HTAB O4 O12

REM Highest difference peak  1.063,  deepest hole -0.811,  1-sigma level  0.143
Q1    1   0.5191  0.8616  0.7350  11.00000  0.05    1.06
Q2    1   0.8920  0.7751 -0.0986  11.00000  0.05    0.71
Q3    1   0.1440  0.5920  0.0524  11.00000  0.05    0.60
Q4    1   0.2306  0.3396  0.4423  11.00000  0.05    0.57
Q5    1   0.2690  0.6548  0.2441  11.00000  0.05    0.54
Q6    1   0.4583  0.8739  0.6580  11.00000  0.05    0.51
Q7    1   0.3182  0.7396  0.2294  11.00000  0.05    0.50
Q8    1   0.1900  0.5814  0.1152  11.00000  0.05    0.49
Q9    1   1.4324  1.4278  0.3642  11.00000  0.05    0.49
Q10   1   0.6547  0.6984  0.1683  11.00000  0.05    0.47
Q11   1   0.4150  0.4785  0.4715  11.00000  0.05    0.47
Q12   1  -0.3389  0.7147  0.3972  11.00000  0.05    0.47
Q13   1   0.4525  0.3867  0.3453  11.00000  0.05    0.47
Q14   1   0.9601  0.9149  0.1687  11.00000  0.05    0.46
Q15   1   0.8975  0.7411  0.5150  11.00000  0.05    0.45
Q16   1   0.6829  0.8024  0.3176  11.00000  0.05    0.45
Q17   1   1.0037  0.8526  0.0368  11.00000  0.05    0.45
Q18   1   1.1260  0.9306  0.1690  11.00000  0.05    0.45
Q19   1   0.2687  0.4400  0.0319  11.00000  0.05    0.45
Q20   1   0.5621  0.7352  0.1220  11.00000  0.05    0.44
Q21   1   0.3066  0.4125  0.4540  11.00000  0.05    0.43
Q22   1   0.8951  0.8406  0.4671  11.00000  0.05    0.43
Q23   1   0.6418  0.8125  0.2491  11.00000  0.05    0.43
Q24   1   0.0505  0.5695  0.0574  11.00000  0.05    0.43
Q25   1   1.3424  1.3618  0.3366  11.00000  0.05    0.43
Q26   1   0.2746  0.8802  0.1338  11.00000  0.05    0.42
Q27   1   0.5128  0.9636  0.7835  11.00000  0.05    0.42
Q28   1   0.3825  0.3202 -0.0456  11.00000  0.05    0.42
Q29   1   0.2910  0.5849  0.1798  11.00000  0.05    0.42
Q30   1  -0.1334  0.6336  0.4851  11.00000  0.05    0.41
Q31   1   0.3783  0.5254  0.0917  11.00000  0.05    0.41
Q32   1   1.0623  0.7532  0.0378  11.00000  0.05    0.40
Q33   1   1.0615  1.0989  0.1252  11.00000  0.05    0.40
Q34   1   0.7812  0.8818  0.3487  11.00000  0.05    0.40
Q35   1  -0.1651  0.7274  0.3147  11.00000  0.05    0.40
Q36   1   0.3288  0.5583  0.1187  11.00000  0.05    0.40
;
_shelx_res_checksum   19156

_shelx_hkl_file
;
   0   0   2  416099    2524                                                      325378   17.35   -0.01  1.0000
   0   0   2    8420     351                                                         289   17.35   -0.01  1.0000
   0   0   3   11114     688                                                       15815   -4.77    0.01  1.0000
   0   0   3      28     579                                                         254   -4.77    0.01  1.0000
   0   0   4   47612    1377                                                       49194   -0.84   -0.01  1.0000
   0   0   4      84     639                                                         163   -0.84   -0.01  1.0000
   0   0   5    7830     598                                                        6483    1.86    0.00  1.0000
   0   0   6    3565     595                                                        4985   -2.57    0.00  1.0000
   0   0   7  139075    3177                                                      151600    3.81    0.00  1.0000
   0   0   8   10311    1081                                                       13773   -3.68    0.00  1.0000
   0   0   9  154941    3666                                                      150300    1.38    0.00  1.0000
   0   0  10    1471     604                                                        1965    1.39    0.00  1.0000
   0   0  11     514     746                                                         131   -2.60    0.00  1.0000
   0   0  11  135632    3824                                                      127516   -2.60    0.00  1.0000
   0   0  12   16970    1611                                                       19251    1.98    0.01  1.0000
   0   0  13    9534    1285                                                       10132   -0.71   -0.01  1.0000
   0   0  14   14267    1555                                                       14374   -0.11    0.01  1.0000
   0   0  15    1092     756                                                        1173    0.28   -0.01  1.0000
   0   0  16       0     838                                                        -396   -0.16    0.00  1.0000
   0  -1  16    3996    1121                                                        4145    0.27   -0.01  1.0000
   0  -1  15   20391    1921                                                       20287   -0.09    0.01  1.0000
   0  -1  14     728     655                                                         951   -0.90   -0.01  1.0000
   0  -1  13   23030    1711                                                       19815    2.58    0.00  1.0000
   0  -1  12    6663    1169                                                        9750   -3.98    0.00  1.0000
   0  -1  11    4506     987                                                        7024    3.89    0.00  1.0000
   0  -1  10      83     732                                                        -171   -2.11    0.00  1.0000
   0  -1  10   21802    1407                                                       19201   -2.11    0.00  1.0000
   0  -1   9   33860    1729                                                       33777   -0.05   -0.01  1.0000
   0  -1   8      53     311                                                          36    0.97    0.01  1.0000
   0  -1   7   21906    1225                                                       22633   -0.57   -0.01  1.0000
   0  -1   7   85858    4542                                                       87291   -0.57   -0.01  1.0000
   0  -1   6  232820    3555                                                      231315    0.36    0.01  1.0000
   0  -1   5   34381    1216                                                       32935   -0.92    0.00  1.0000
   0  -1   4  424011    3815                                                      421284   -0.49    0.00  1.0000
   0  -1   3   12184     721                                                       20465    7.60    0.00  1.0000
   0  -1   2  144273    1800                                                      215347  -19.60   -0.01  1.0000
   0   1   1   57746    1174                                                      100888   17.94   -0.01  1.0000
   0   1   2  134400    1605                                                      119342   -4.91    0.01  1.0000
   0   1   3  276916    1938                                                      263962   -2.89    0.00  1.0000
   0   1   3  270248    2772                                                      257453   -2.89    0.00  1.0000
   0   1   4   43353    1435                                                       52273    4.74   -0.01  1.0000
   0   1   4   44926    1524                                                       53998    4.74   -0.01  1.0000
   0   1   4   41418     877                                                       50145    4.74   -0.01  1.0000
   0   1   5  124067    2755                                                      139027   -4.81    0.01  1.0000
   0   1   5  121224    1429                                                      136016   -4.81    0.01  1.0000
   0   1   6   23947    1058                                                       16861    5.79   -0.02  1.0000
   0   1   6   23500     511                                                       16486    5.79   -0.02  1.0000
   0   1   7  106556    2546                                                       89188   -6.49    0.01  1.0000
   0   1   7  101478    1130                                                       84548   -6.49    0.01  1.0000
   0   1   8   29874    1802                                                       37809    5.03   -0.01  1.0000
   0   1   9   84933    2887                                                       90079   -2.02    0.00  1.0000
   0   1  10   36697    1995                                                       37166   -0.28    0.00  1.0000
   0   1  11      10     920                                                        -401    0.73    0.00  1.0000
   0   1  11    1303     651                                                        1536    0.73    0.00  1.0000
   0   1  12    2540     757                                                        2494   -0.11    0.00  1.0000
   0   1  13     546     640                                                         482   -0.33    0.00  1.0000
   0   1  14   12693    1539                                                       12924    0.24    0.00  1.0000
   0   1  15     542     757                                                         539   -0.01   -0.01  1.0000
   0   1  16   12056    1657                                                       12167   -0.12    0.01  1.0000
   0  -2  17    6414    1328                                                        6367    0.07    0.00  1.0000
   0  -2  16    1583     910                                                        1654   -0.20    0.00  1.0000
   0  -2  15    1207     770                                                        1103   -0.36    0.00  1.0000
   0  -2  14     429     599                                                         165    1.84   -0.01  1.0000
   0  -2  14     271     785                                                          74    1.84   -0.01  1.0000
   0  -2  13    6206     895                                                        4108   -3.42    0.01  1.0000
   0  -2  12    5310    1059                                                        7986    3.86   -0.01  1.0000
   0  -2  11   24160    1733                                                       28067   -2.81    0.00  1.0000
   0  -2  10   38962    1862                                                       36878    1.25    0.00  1.0000
   0  -2   9    6560     758                                                        6295   -0.38    0.00  1.0000
   0  -2   8  113230    2803                                                      114005    0.27   -0.01  1.0000
   0  -2   8       1     629                                                          -5    0.27   -0.01  1.0000
   0   2  -7   99039    1163                                                       99767    0.27   -0.01  1.0000
   0  -2   7  124630    2716                                                      125447    0.27    0.01  1.0000
   0  -2   6   25204    1192                                                       28124   -2.09    0.00  1.0000
   0  -2   6      81    1679                                                         -53   -2.09    0.00  1.0000
   0  -2   5   93213    1841                                                       83138    3.94    0.00  1.0000
   0  -2   5     612     551                                                          60    3.94    0.00  1.0000
   0  -2   4    7563     572                                                        9773   -2.77    0.01  1.0000
   0  -2   4     142     329                                                         -17   -2.77    0.01  1.0000
   0  -2   3   69295    1325                                                       76206   -2.97   -0.01  1.0000
   0  -2   2   81715     990                                                       58312   10.30    0.01  1.0000
   0   2   0    1828     364                                                        6685    9.06    0.00  1.0000
   0  -2   0    1160     302                                                        5338    9.06    0.00  1.0000
   0   2   1   82480    1354                                                       84622   -0.86    0.00  1.0000
   0   2   2   63891    1437                                                       75460   -5.09    0.01  1.0000
   0   2   3  197455    2768                                                      221722    6.17   -0.01  1.0000
   0   2   4   18290     765                                                       13114   -4.84    0.02  1.0000
   0   2   4   16948     595                                                       11982   -4.84    0.02  1.0000
   0   2   5   80577    1875                                                       70032    4.48   -0.03  1.0000
   0   2   5   81153    1378                                                       70569    4.48   -0.03  1.0000
   0   2   6     194     144                                                         106   -5.27    0.02  1.0000
   0   2   6     118     266                                                         225   -5.27    0.02  1.0000
   0   2   6     516     622                                                        -198   -5.27    0.02  1.0000
   0   2   6     197     268                                                         103   -5.27    0.02  1.0000
   0   2   7     200     162                                                         343    5.20   -0.01  1.0000
   0   2   7     295     393                                                         739    5.20   -0.01  1.0000
   0   2   8    3980     613                                                        2360   -3.37    0.00  1.0000
   0   2   9    2021     565                                                        1609    1.14    0.01  1.0000
   0   2  10    1107     592                                                        1080   -0.10   -0.01  1.0000
   0   2  11    1036     636                                                        1099    0.23    0.01  1.0000
   0   2  12   12038    1390                                                       12490   -0.48    0.00  1.0000
   0   2  13   10202    1323                                                        9980    0.26    0.01  1.0000
   0   2  14    9650    1408                                                        9741    0.11   -0.01  1.0000
   0   2  15    7279    1310                                                        7098   -0.25    0.01  1.0000
   0  -3  16    3313     983                                                        3460    0.29    0.00  1.0000
   0  -3  15     304     613                                                         254    0.35   -0.01  1.0000
   0  -3  14   11082    1415                                                       12493   -1.52    0.01  1.0000
   0  -3  13      79     568                                                        -349    2.06   -0.01  1.0000
   0  -3  13     412    1646                                                         850    2.06   -0.01  1.0000
   0  -3  12   20167    1518                                                       18544   -1.36    0.00  1.0000
   0  -3  11     134     425                                                         114    0.23    0.00  1.0000
   0  -3  10      27     634                                                          21    0.14   -0.01  1.0000
   0  -3  10   21295    1437                                                       21125    0.14   -0.01  1.0000
   0  -3   9     676     393                                                         624    0.24    0.00  1.0000
   0   3  -8    3928     317                                                        3924   -0.01    0.00  1.0000
   0  -3   8    3297     556                                                        3292   -0.01    0.00  1.0000
   0  -3   7   14799    1018                                                       16830   -1.88    0.00  1.0000
   0  -3   6   10585     870                                                       15235    4.78    0.00  1.0000
   0  -3   5  173639    2455                                                      150644   -6.63    0.00  1.0000
   0  -3   4   48428    1374                                                       59996    5.78    0.00  1.0000
   0  -3   3     143     230                                                         -76   -2.78    0.00  1.0000
   0  -3   3   12007     659                                                       14718   -2.78    0.00  1.0000
   0   3  -1   31578     954                                                       30243   -0.89    0.01  1.0000
   0   3   0   94579    1573                                                       85260    3.61   -0.01  1.0000
   0   3   1  107041    1923                                                      122874   -5.43    0.01  1.0000
   0   3   2    9893     495                                                        6517    4.35   -0.01  1.0000
   0   3   3   18334     834                                                       16518   -1.61    0.01  1.0000
   0   3   4     506     248                                                         502   -0.03   -0.02  1.0000
   0   3   4     840     234                                                         835   -0.03   -0.02  1.0000
   0   3   5    8927     621                                                        9262   -0.42    0.02  1.0000
   0   3   5    8717     734                                                        9048   -0.42    0.02  1.0000
   0   3   6   24963    1325                                                       27064    1.51   -0.01  1.0000
   0   3   6   23573    1014                                                       25616    1.51   -0.01  1.0000
   0   3   7   31345    1054                                                       28896   -1.64   -0.01  1.0000
   0   3   7   30767    1589                                                       28341   -1.64   -0.01  1.0000
   0   3   7   30834    1465                                                       28406   -1.64   -0.01  1.0000
   0   3   8      13     947                                                         -73    0.84    0.02  1.0000
   0   3   8    1839     544                                                        1555    0.84    0.02  1.0000
   0   3   9   16483    1393                                                       16740   -0.23   -0.02  1.0000
   0   3  10    6485     983                                                        6721    0.34    0.01  1.0000
   0   3  11    3440     840                                                        3128   -0.64   -0.01  1.0000
   0   3  12   19427    1721                                                       18808    0.52    0.00  1.0000
   0   3  13     786     679                                                         813   -0.11    0.00  1.0000
   0   3  14    9062    1408                                                        8950   -0.14    0.00  1.0000
   0   3  15     791     911                                                         758    0.14    0.00  1.0000
   0  -4  14     479     606                                                         460    0.11    0.00  1.0000
   0  -4  13     267     909                                                         301    0.25    0.00  1.0000
   0  -4  13     618     556                                                         670    0.25    0.00  1.0000
   0  -4  12    9967    1086                                                        9089   -1.05    0.01  1.0000
   0  -4  11    4113     701                                                        3522    1.13   -0.01  1.0000
   0  -4  11      24     833                                                        -267    1.13   -0.01  1.0000
   0  -4  10   33596    1773                                                       33827   -0.15    0.01  1.0000
   0  -4   9    5026     673                                                        4639   -0.65    0.00  1.0000
   0  -4   8    4849     640                                                        4760   -0.15    0.00  1.0000
   0  -4   7    2685     394                                                        1731    2.39    0.00  1.0000
   0  -4   6     142     205                                                          77   -4.52   -0.01  1.0000
   0  -4   5     275     347                                                          45    5.23    0.01  1.0000
   0  -4   5      85     204                                                         356    5.23    0.01  1.0000
   0  -4   4     604     354                                                          30   -4.70   -0.01  1.0000
   0  -4   4    2564     270                                                        1138   -4.70   -0.01  1.0000
   0   4  -2   53882    1387                                                       45195   -4.54    0.01  1.0000
   0  -4   2     382     246                                                         -32   -4.54   -0.01  1.0000
   0   4  -1  322485    3714                                                      348041    5.13   -0.01  1.0000
   0   4   0   64366    1677                                                       74267   -4.37    0.01  1.0000
   0   4   1   14780     724                                                       13246    1.53    0.00  1.0000
   0   4   2    1168     326                                                        1878    2.13    0.00  1.0000
   0   4   3    2714     520                                                        4921   -4.40    0.00  1.0000
   0   4   4    1375     275                                                         359    4.25    0.00  1.0000
   0   4   5    3105     520                                                        4447   -2.56    0.00  1.0000
   0   4   5    3799     685                                                        5270   -2.56    0.00  1.0000
   0   4   5    2957     576                                                        4270   -2.56    0.00  1.0000
   0   4   6    3266     478                                                        3734    0.93   -0.01  1.0000
   0   4   6    3213     577                                                        3677    0.93   -0.01  1.0000
   0   4   7    7575     827                                                        7654   -0.11    0.01  1.0000
   0   4   7    7875     668                                                        7955   -0.11    0.01  1.0000
   0   4   7    7023     870                                                        7099   -0.11    0.01  1.0000
   0   4   8    5721     887                                                        5896   -0.27   -0.01  1.0000
   0   4   8    5894     798                                                        6071   -0.27   -0.01  1.0000
   0   4   9   13810    1372                                                       14531    0.70    0.01  1.0000
   0   4  10   16097    1459                                                       14907   -1.13    0.00  1.0000
   0   4  11    2361     827                                                        2883    1.19    0.00  1.0000
   0   4  12   12984    1538                                                       13795   -0.83    0.00  1.0000
   0   4  13    3118     976                                                        2926    0.41    0.00  1.0000
   0   4  14    4766    1097                                                        4652   -0.20    0.01  1.0000
   0  -5  12    1230     613                                                        1617    1.24    0.00  1.0000
   0  -5  11     702     765                                                         638   -0.29    0.00  1.0000
   0  -5  11    1544     579                                                        1448   -0.29    0.00  1.0000
   0  -5  10     787     426                                                         586   -0.89    0.00  1.0000
   0  -5   9    5843     723                                                        5166    1.06    0.00  1.0000
   0  -5   8   60245    2042                                                       60077    0.08    0.01  1.0000
   0  -5   7   42733    1648                                                       45337   -1.44   -0.01  1.0000
   0  -5   7      13     536                                                          96   -1.44   -0.01  1.0000
   0  -5   6   45897    1622                                                       49468    1.90    0.01  1.0000
   0  -5   5   93866    2022                                                       89706   -1.60   -0.01  1.0000
   0  -5   2     993     467                                                         236    3.75    0.00  1.0000
   0   5  -2   11324     669                                                        8147    3.75    0.00  1.0000
   0  -5   1   11259     646                                                        8406   -3.39    0.00  1.0000
   0   5  -1   10027     637                                                        7346   -3.39    0.00  1.0000
   0   5   0     169     213                                                         274    0.88    0.01  1.0000
   0   5   1   14288     915                                                       17122    2.63   -0.01  1.0000
   0   5   2    1098     246                                                         170   -5.06    0.01  1.0000
   0   5   3   85607    2025                                                       72914    5.24   -0.01  1.0000
   0   5   4   82693    2368                                                       92021   -3.67    0.00  1.0000
   0   5   5   11043     963                                                       12647    1.71    0.00  1.0000
   0   5   5    8549     904                                                        9967    1.71    0.00  1.0000
   0   5   6   97841    2697                                                       97147   -0.26    0.00  1.0000
   0   5   6   95031    2443                                                       94347   -0.26    0.00  1.0000
   0   5   7    1019     476                                                        1196   -0.62    0.00  1.0000
   0   5   7    1356     402                                                        1558   -0.62    0.00  1.0000
   0   5   8   36661    1805                                                       34685    1.23   -0.01  1.0000
   0   5   8   37332    2002                                                       35338    1.23   -0.01  1.0000
   0   5   9   13104    1463                                                       14787   -1.66    0.01  1.0000
   0   5   9   12548    1284                                                       14196   -1.66    0.01  1.0000
   0   5  10    3361     939                                                        4308    1.81   -0.01  1.0000
   0   5  11    4306     928                                                        3461   -1.58    0.01  1.0000
   0   5  12     512     689                                                         754    1.12    0.00  1.0000
   0   5  13    1427     858                                                        1216   -0.68    0.00  1.0000
   0   5  14    1738     824                                                        1604    0.38    0.00  1.0000
   0  -6   9   41719    1847                                                       41277   -0.25    0.00  1.0000
   0  -6   8     364     339                                                         282   -0.53   -0.01  1.0000
   0  -6   7  121540    2794                                                      119912    0.54    0.01  1.0000
   0  -6   6   74389    2041                                                       74042    0.15    0.00  1.0000
   0  -6   4       0     440                                                         -60   -0.14    0.01  1.0000
   0   6  -3   12221     980                                                       13870    1.68    0.01  1.0000
   0  -6   2      20     337                                                          76   -2.72    0.01  1.0000
   0   6  -2      48     289                                                         283   -2.72   -0.01  1.0000
   0   6  -1   23775    1154                                                       21081    2.10    0.01  1.0000
   0   6   0   91949    2353                                                       92009   -0.02   -0.01  1.0000
   0   6   1   40370    1468                                                       36948   -2.02    0.01  1.0000
   0   6   2  236199    3867                                                      247484    2.67    0.00  1.0000
   0   6   3    2725     441                                                        1966   -1.85    0.00  1.0000
   0   6   4  124711    2906                                                      123100    0.53    0.00  1.0000
   0   6   4  122952    3015                                                      121352    0.53    0.00  1.0000
   0   6   5   63781    2196                                                       62842    0.43   -0.01  1.0000
   0   6   5   63443    2205                                                       62507    0.43   -0.01  1.0000
   0   6   6     635     408                                                         468   -0.91    0.01  1.0000
   0   6   6     637     395                                                         471   -0.91    0.01  1.0000
   0   6   7    4595     701                                                        5292    1.16   -0.01  1.0000
   0   6   7    3806     753                                                        4441    1.16   -0.01  1.0000
   0   6   8    9012    1051                                                        7928   -1.37    0.01  1.0000
   0   6   8    8677     946                                                        7614   -1.37    0.01  1.0000
   0   6   9    9906    1336                                                       11251    1.52   -0.01  1.0000
   0   6   9    9732    1164                                                       11065    1.52   -0.01  1.0000
   0   6  10    3225     877                                                        4009   -1.52    0.00  1.0000
   0   6  10    3339     968                                                        4136   -1.52    0.00  1.0000
   0   6  11   40080    2478                                                       37880    1.30    0.00  1.0000
   0   6  12     447     764                                                         628   -0.93    0.00  1.0000
   0   6  13   21525    2080                                                       22211    0.54    0.00  1.0000
   0  -7  15     150    1152                                                         181   -0.28    0.00  1.0000
   0  -7   6      42     674                                                         110   -0.92   -0.01  1.0000
   0   7  -4   22461    1374                                                       22289    0.13    0.01  1.0000
   0  -7   4      77     431                                                          68    0.13   -0.01  1.0000
   0   7  -3    1799     446                                                        1271   -1.58    0.00  1.0000
   0  -7   2   92248    2596                                                       98809    2.47    0.00  1.0000
   0   7  -2   93525    2734                                                      100129    2.47    0.00  1.0000
   0   7  -1   43735    1713                                                       39822   -2.22    0.00  1.0000
   0   7   0   76663    2267                                                       73832    1.20    0.00  1.0000
   0   7   1   57434    2005                                                       58287   -0.41    0.01  1.0000
   0   7   2    5370     692                                                        5651    0.44   -0.01  1.0000
   0   7   3   31266    1499                                                       29906   -0.90    0.01  1.0000
   0   7   4   27149    1639                                                       28679    1.06    0.00  1.0000
   0   7   4   29205    1561                                                       30790    1.06    0.00  1.0000
   0   7   5   16751    1233                                                       15965   -0.72    0.00  1.0000
   0   7   5   17354    1225                                                       16554   -0.72    0.00  1.0000
   0   7   6    6206     821                                                        6043    0.24   -0.01  1.0000
   0   7   6    6856     854                                                        6685    0.24   -0.01  1.0000
   0   7   7   28195    1688                                                       28246   -0.04    0.01  1.0000
   0   7   7   29166    1625                                                       29219   -0.04    0.01  1.0000
   0   7   8   13756    1297                                                       13610    0.14    0.00  1.0000
   0   7   8   15416    1462                                                       15262    0.14    0.00  1.0000
   0   7   9   36940    2071                                                       36315   -0.38   -0.01  1.0000
   0   7   9   40926    2436                                                       40268   -0.38   -0.01  1.0000
   0   7  10   16951    1557                                                       17583    0.56    0.01  1.0000
   0   7  10   18844    1819                                                       19509    0.56    0.01  1.0000
   0   7  11    8860    1406                                                        9335   -0.58   -0.01  1.0000
   0   7  12    5510    1157                                                        5238    0.43    0.01  1.0000
   0  -8  15     152    1164                                                         175   -0.22    0.00  1.0000
   0  -8  14      11     907                                                         -41    0.76    0.00  1.0000
   0  -8  13      32    1105                                                        -269   -1.32   -0.01  1.0000
   0  -8  12      55     921                                                         139    1.05    0.01  1.0000
   0  -8  11     234     802                                                         247    0.10   -0.01  1.0000
   0  -8  10     499     822                                                         303   -1.14    0.01  1.0000
   0  -8   9      22     789                                                         -66    1.10    0.00  1.0000
   0  -8   8       0     774                                                        -179   -0.04    0.00  1.0000
   0   8  -5    1674     508                                                        1314   -1.12    0.00  1.0000
   0  -8   5     191     545                                                          83   -1.12    0.00  1.0000
   0   8  -4   42692    2014                                                       42426    0.15    0.01  1.0000
   0  -8   4     839     563                                                         802    0.15   -0.01  1.0000
   0   8  -3   17698    1251                                                       16564    1.01   -0.01  1.0000
   0  -8   3   17410    1218                                                       16282    1.01    0.01  1.0000
   0   8  -2    7510     921                                                        8928   -1.82    0.01  1.0000
   0   8  -1    8671     821                                                        7215    1.90    0.00  1.0000
   0   8   0   74061    2341                                                       70571   -1.51    0.00  1.0000
   0   8   1   15982    1204                                                       17377    1.26   -0.01  1.0000
   0   8   2    1852     527                                                        2365   -1.30    0.00  1.0000
   0   8   3   14919    1276                                                       13763    1.13    0.00  1.0000
   0   8   3   16739    1175                                                       15513    1.13    0.00  1.0000
   0   8   4    6935     856                                                        7187   -0.35   -0.01  1.0000
   0   8   4    6123     901                                                        6360   -0.35   -0.01  1.0000
   0   8   5   31898    1720                                                       30807   -0.72    0.01  1.0000
   0   8   5   31812    1823                                                       30723   -0.72    0.01  1.0000
   0   8   6     268     474                                                         341    1.40   -0.01  1.0000
   0   8   6     263     449                                                         334    1.40   -0.01  1.0000
   0   8   7     198     445                                                          77   -1.42    0.00  1.0000
   0   8   7     360     438                                                         192   -1.42    0.00  1.0000
   0   8   8    6535    1052                                                        5857    1.01   -0.01  1.0000
   0   8   8    4434     841                                                        3879    1.01   -0.01  1.0000
   0   8   9       6     682                                                         -67   -0.54    0.01  1.0000
   0   8  10     688     681                                                         733    0.19   -0.01  1.0000
   0   8  11       0     770                                                         -46    0.02    0.00  1.0000
   0   9  -9    1762     589                                                        1791    0.08    0.00  1.0000
   0  -9   7     377     637                                                         113    2.03    0.00  1.0000
   0   9  -6    1719     624                                                        1070   -2.03   -0.01  1.0000
   0   9  -5    3688     860                                                        4543    1.55    0.01  1.0000
   0  -9   5    3919     951                                                        4800    1.55   -0.01  1.0000
   0  -9   4   13389    1229                                                       12629   -0.77    0.01  1.0000
   0   9  -4   12004    1172                                                       11285   -0.77   -0.01  1.0000
   0   9  -3    2203     622                                                        2153   -0.13    0.01  1.0000
   0   9  -2    5614     858                                                        6117    0.76    0.00  1.0000
   0   9  -1   21541    1509                                                       22651   -0.87    0.00  1.0000
   0   9   0   28616    1558                                                       27572    0.72    0.01  1.0000
   0   9   1     369     456                                                         427   -0.74   -0.01  1.0000
   0   9   2    3078     758                                                        3449    0.76    0.01  1.0000
   0   9   2    3303     657                                                        3687    0.76    0.01  1.0000
   0   9   3    1290     532                                                        1359   -0.23   -0.02  1.0000
   0   9   3    1184     571                                                        1251   -0.23   -0.02  1.0000
   0   9   4    1240     619                                                        1521   -0.89    0.02  1.0000
   0   9   4     960     530                                                        1209   -0.89    0.02  1.0000
   0   9   5    5619    1043                                                        6905    1.89   -0.01  1.0000
   0   9   5    7203    1007                                                        8650    1.89   -0.01  1.0000
   0   9   6     371     468                                                         103   -2.13    0.00  1.0000
   0   9   8     684     692                                                         919   -1.11    0.00  1.0000
   0   9   9     642     724                                                         803    0.71    0.00  1.0000
   0   9  10     266     795                                                         327   -0.42    0.00  1.0000
   0   9  11    1171     846                                                        1121    0.17    0.00  1.0000
   0 -10  11       1    1049                                                         -58    0.21    0.01  1.0000
   0 -10  10      41     856                                                          40   -0.01   -0.01  1.0000
   0 -10   9      12     749                                                        -239   -0.81    0.00  1.0000
   0  10  -9      22     459                                                          58   -0.81    0.00  1.0000
   0  10  -8    4644     797                                                        3748    1.61    0.00  1.0000
   0  10  -8    4349     880                                                        3484    1.61    0.00  1.0000
   0  10  -7      69     602                                                        -138   -1.92    0.00  1.0000
   0 -10   7     623     756                                                         279   -1.92    0.00  1.0000
   0 -10   6   10692    1433                                                       12350    1.79   -0.01  1.0000
   0  10  -6   10558    1370                                                       12206    1.79    0.01  1.0000
   0 -10   5     175     546                                                         372   -1.41    0.00  1.0000
   0  10  -5     156     547                                                         344   -1.41    0.00  1.0000
   0  10  -4     192     482                                                         108    0.82    0.00  1.0000
   0  10  -3    1924     628                                                        1856   -0.18    0.01  1.0000
   0  10  -2       0     465                                                         -17   -0.16   -0.01  1.0000
   0  10  -1    1031     564                                                         997    0.12    0.01  1.0000
   0  10   0    3675     721                                                        3631   -0.08   -0.01  1.0000
   0  10   1   12390    1383                                                       12614    0.23    0.01  1.0000
   0  10   1   12925    1213                                                       13154    0.23    0.01  1.0000
   0  10   2    2277     720                                                        2353   -0.18   -0.01  1.0000
   0  10   3    8955    1191                                                        9335   -0.46    0.01  1.0000
   0  10   4     134     604                                                         308    1.38    0.00  1.0000
   0  10   5     280     613                                                         589   -1.82   -0.01  1.0000
   0  10   6    1233     682                                                        1727    1.49    0.01  1.0000
   0  10   7     347     674                                                         505   -0.90   -0.01  1.0000
   0  10   8    1172     739                                                        1344    0.56    0.01  1.0000
   0  10   9     677     815                                                         574   -0.48   -0.01  1.0000
   0  10  10    1674     866                                                        1555    0.35    0.00  1.0000
   0  11 -10     599     735                                                         592   -0.03    0.00  1.0000
   0 -11   9    1351    1058                                                        1502    0.47    0.01  1.0000
   0  11  -9    1823     735                                                        1998    0.47   -0.01  1.0000
   0  11  -9    1741     892                                                        1912    0.47   -0.01  1.0000
   0  11  -8      15     540                                                        -177   -0.90    0.01  1.0000
   0 -11   8      15     904                                                        -496   -0.90   -0.01  1.0000
   0  11  -8      15     606                                                        -220   -0.90    0.01  1.0000
   0 -11   7    8287    1376                                                        7448    1.10    0.00  1.0000
   0  11  -7   10369    1346                                                        9428    1.10    0.00  1.0000
   0  11  -7    8856    1113                                                        7988    1.10    0.00  1.0000
   0  11  -6    5823    1053                                                        6536   -1.06    0.00  1.0000
   0 -11   6    5144    1130                                                        5816   -1.06    0.00  1.0000
   0  11  -6    5990    1161                                                        6713   -1.06    0.00  1.0000
   0  11  -5     605     635                                                         785    0.80   -0.01  1.0000
   0  11  -4    1996     723                                                        1861   -0.36    0.01  1.0000
   0  11  -3   20898    1662                                                       20856   -0.03   -0.01  1.0000
   0  11  -1    4574     982                                                        4571    0.01    0.00  1.0000
   0  11   0    5556    1084                                                        5586   -0.05    0.00  1.0000
   0  11   1     948     739                                                         944   -0.02    0.00  1.0000
   0  11   2    5383    1031                                                        5284   -0.16    0.00  1.0000
   0  11   3       8     637                                                         -46    0.65    0.01  1.0000
   0  11   4     890     686                                                         643   -1.04   -0.01  1.0000
   0  11   5    1550     714                                                        1269    0.87    0.01  1.0000
   0  11   6    1926     835                                                        2059   -0.35   -0.01  1.0000
   0  11   7       0     729                                                        -174    0.02    0.01  1.0000
   0  11   8    5384    1166                                                        5333   -0.08   -0.01  1.0000
   0  11   9     267     904                                                         300    0.23    0.00  1.0000
   0  12 -12    1386    1144                                                        1415    0.09    0.00  1.0000
   0 -12  11     564    1059                                                         532    0.16   -0.01  1.0000
   0  12 -11     637     963                                                         602    0.16    0.01  1.0000
   0 -12  10    2588    1202                                                        2685   -0.22    0.01  1.0000
   0  12 -10    1587     961                                                        1665   -0.22   -0.01  1.0000
   0  12  -9     288     601                                                         285   -0.02    0.01  1.0000
   0 -12   9      85     849                                                          84   -0.02   -0.01  1.0000
   0  12  -9     465     775                                                         460   -0.02    0.01  1.0000
   0  12  -8    1693     897                                                        1822    0.36   -0.01  1.0000
   0  12  -8    1679     781                                                        1808    0.36   -0.01  1.0000
   0 -12   8    1285     923                                                        1399    0.36    0.01  1.0000
   0  12  -7    4928    1007                                                        4592   -0.57    0.01  1.0000
   0  12  -6     281     610                                                         370    0.57   -0.01  1.0000
   0  12  -5   15987    1647                                                       16384   -0.36    0.01  1.0000
   0  12  -4   11045    1424                                                       11028    0.02   -0.01  1.0000
   0  12  -3    1726     870                                                        1810    0.26    0.00  1.0000
   0  12  -2    4660    1001                                                        4481   -0.31    0.01  1.0000
   0  12  -1    3148     962                                                        3230    0.17   -0.01  1.0000
   0  12   0       0     722                                                        -334   -0.02    0.01  1.0000
   0  12   1    1534     840                                                        1567   -0.10   -0.01  1.0000
   0  12   2    2585     904                                                        2471    0.27    0.01  1.0000
   0  12   3     576     723                                                         496   -0.40   -0.01  1.0000
   0  12   4    6589    1172                                                        6788    0.28    0.00  1.0000
   0  12   5    1451     825                                                        1481    0.09    0.00  1.0000
   0  12   6    3859    1031                                                        4073   -0.40    0.00  1.0000
   0 -13  10     196     971                                                         216    0.17   -0.01  1.0000
   0  13  -8    1385     843                                                        1497   -0.35    0.00  1.0000
   0  13  -7     417     773                                                         343    0.44    0.00  1.0000
   0  13  -6    5184    1117                                                        4938   -0.40    0.00  1.0000
   0  13  -5    5245    1159                                                        5396    0.24    0.00  1.0000
   0  13  -4    1801     935                                                        1783    0.05    0.00  1.0000
   0  13  -3    4777    1149                                                        4992   -0.36    0.01  1.0000
   0  13  -2    2118     855                                                        1934    0.48   -0.01  1.0000
   0  13  -1       2     772                                                        -267   -0.33    0.01  1.0000
   0  13   0    3888    1124                                                        3921    0.06    0.00  1.0000
   0  13   1     991     899                                                        1028    0.14    0.00  1.0000
   0  13   2    2639     988                                                        2709   -0.16    0.00  1.0000
   0  13   3    4276    1082                                                        4274    0.01    0.00  1.0000
   0  13   4       1     771                                                        -274    0.24    0.01  1.0000
   0  14  -8     403     855                                                         451    0.27    0.01  1.0000
   0  14  -7     792     912                                                         851   -0.24    0.00  1.0000
   0  14  -6    5574    1211                                                        5409    0.26    0.00  1.0000
   0  14  -5    1063     900                                                         998   -0.24    0.00  1.0000
   0  14  -4    3201    1085                                                        3212    0.02    0.00  1.0000
   0  14  -3    1534     952                                                        1636    0.30    0.00  1.0000
  -1  14   1    3169    1076                                                        3171    0.00    0.00  1.0000
  -1  14   0     262     830                                                         280    0.12   -0.01  1.0000
  -1  14  -1    2667    1064                                                        2518   -0.34    0.01  1.0000
  -1  14  -2    1586     869                                                        1741    0.45   -0.01  1.0000
  -1  14  -3     122     687                                                          95   -0.30    0.01  1.0000
  -1  14  -4    3366    1032                                                        3352    0.03    0.00  1.0000
  -1  14  -5    1064     759                                                        1010    0.20    0.00  1.0000
  -1  14  -6       3     821                                                        -285   -0.37    0.00  1.0000
  -1  14  -7     429     702                                                         533    0.55    0.00  1.0000
  -1  14  -8     190     697                                                         122   -0.64    0.01  1.0000
   1 -14   9      92     991                                                          56    0.49    0.01  1.0000
  -1  13   6     260     848                                                         230   -0.22    0.00  1.0000
  -1  13   5     936     853                                                         925    0.04    0.00  1.0000
  -1  13   4    1121     872                                                        1082    0.14    0.01  1.0000
  -1  13   3       1     690                                                        -289   -0.19   -0.01  1.0000
  -1  13   2    1940     899                                                        2008    0.18    0.01  1.0000
  -1  13   1    1131     882                                                        1184   -0.18   -0.01  1.0000
  -1  13   0    3493    1041                                                        3430    0.12    0.01  1.0000
  -1  13  -1     221     650                                                         213    0.07   -0.01  1.0000
  -1  13  -2     957     795                                                         889   -0.26    0.00  1.0000
  -1  13  -3    2697     970                                                        2805    0.24    0.01  1.0000
  -1  13  -4     197     647                                                         201    0.04   -0.01  1.0000
  -1  13  -5     726     757                                                         627   -0.44    0.01  1.0000
  -1  13  -6     902     745                                                         711    0.79   -0.01  1.0000
   1 -13   7    4963    1250                                                        5561   -0.96   -0.01  1.0000
  -1  13  -7    3896    1064                                                        4427   -0.96    0.01  1.0000
   1 -13   8      13     791                                                        -212    0.83    0.01  1.0000
  -1  13  -8     167     714                                                         272    0.83   -0.01  1.0000
   1 -13   9    1585    1176                                                        1420   -0.50   -0.01  1.0000
   1 -13  10     132    1044                                                         156    0.29    0.01  1.0000
  -1  12   6     679     737                                                         591   -0.41   -0.01  1.0000
  -1  12   5      11     674                                                        -366    0.75    0.01  1.0000
  -1  12   4    1019     774                                                        1243   -0.78   -0.01  1.0000
  -1  12   3     502     720                                                         598    0.48    0.00  1.0000
  -1  12   2     944     747                                                         880   -0.25    0.00  1.0000
  -1  12   1     710     643                                                         643    0.30    0.00  1.0000
  -1  12   0    1669     743                                                        1798   -0.36    0.00  1.0000
  -1  12  -1     252     709                                                         260    0.12   -0.01  1.0000
  -1  12  -2       1     604                                                         -48    0.23    0.01  1.0000
  -1  12  -3    2091     844                                                        2184   -0.23   -0.02  1.0000
  -1  12  -4     219     676                                                         190   -0.24    0.01  1.0000
  -1  12  -5      14     571                                                        -131    0.87   -0.01  1.0000
   1 -12   5     111     555                                                         198    0.87    0.01  1.0000
  -1  12  -6    1441     727                                                        1055   -1.27    0.00  1.0000
   1 -12   6    2258     869                                                        1767   -1.27    0.00  1.0000
   1 -12   7     274     781                                                         122    1.28    0.00  1.0000
  -1  12  -7    1034     685                                                         710    1.28    0.00  1.0000
  -1  12  -8      17     605                                                        -269   -0.96    0.00  1.0000
   1 -12   9     160     866                                                         228    0.58    0.00  1.0000
   1 -12  10       3     966                                                         -26   -0.42    0.01  1.0000
   1 -12  11      50    1081                                                          23    0.52   -0.01  1.0000
  -1  11   9       5     741                                                        -203   -0.50   -0.01  1.0000
  -1  11   8     411     710                                                         321    0.55    0.01  1.0000
  -1  11   7    6297    1140                                                        5740   -0.83   -0.01  1.0000
  -1  11   6    1270     769                                                        1694    1.29    0.00  1.0000
  -1  11   5     261     603                                                         402   -1.41    0.00  1.0000
  -1  11   4   10450    1278                                                        9691    0.88   -0.01  1.0000
  -1  11   3    4389     962                                                        4306   -0.15    0.01  1.0000
  -1  11   2    4178     932                                                        4114   -0.12   -0.01  1.0000
  -1  11   1     670     643                                                         691   -0.10    0.01  1.0000
  -1  11   0    1266     716                                                        1224    0.14   -0.01  1.0000
  -1  11  -1    2737     785                                                        2621    0.26    0.01  1.0000
  -1  11  -2     407     615                                                         316   -0.57   -0.01  1.0000
  -1  11  -3     162     576                                                         141    0.19    0.00  1.0000
   1 -11   4     186     508                                                         276    0.73   -0.01  1.0000
  -1  11  -4     361     616                                                         485    0.73    0.01  1.0000
  -1  11  -5    1830     673                                                        1308   -1.54   -0.01  1.0000
   1 -11   5     343     623                                                         142   -1.54    0.01  1.0000
  -1  11  -6    1275     627                                                         791    1.84    0.01  1.0000
  -1  11  -6    1340     653                                                         843    1.84    0.01  1.0000
  -1  11  -7    8671    1214                                                       10047   -1.65    0.00  1.0000
  -1  11  -7   11245    1450                                                       12805   -1.65    0.00  1.0000
  -1  11  -8    3154     930                                                        3756    1.19    0.00  1.0000
  -1  11  -8    2683     820                                                        3240    1.19    0.00  1.0000
   1 -11  11       3    1161                                                        -312   -0.42    0.01  1.0000
   1 -11  12     106    1133                                                          65    0.51    0.00  1.0000
  -1  10  10     685     816                                                         578   -0.50    0.00  1.0000
  -1  10   9    6927    1173                                                        6506    0.60    0.00  1.0000
  -1  10   8   10951    1436                                                       11724   -0.85    0.00  1.0000
  -1  10   7    2491     894                                                        3075    1.30    0.00  1.0000
  -1  10   7    1978     772                                                        2501    1.30    0.00  1.0000
  -1  10   6    1987     686                                                        1457   -1.55    0.01  1.0000
  -1  10   6    1918     692                                                        1397   -1.55    0.01  1.0000
  -1  10   5     831     602                                                        1130    1.11   -0.01  1.0000
  -1  10   5    1632     720                                                        2042    1.11   -0.01  1.0000
  -1  10   4      36     500                                                          34   -0.12    0.01  1.0000
  -1  10   3     909     605                                                        1075   -0.61   -0.01  1.0000
  -1  10   2    3766     807                                                        3453    0.61    0.01  1.0000
  -1  10   1     974     634                                                         881   -0.35    0.00  1.0000
  -1  10   0   12210    1329                                                       12757    0.57    0.00  1.0000
  -1  10  -1    4065     822                                                        3504   -1.07    0.00  1.0000
  -1  10  -2   18297    1481                                                       17169    0.99   -0.01  1.0000
  -1  10  -2   20430    1350                                                       19236    0.99   -0.01  1.0000
   1 -10   3   16327    1414                                                       16306    0.02   -0.01  1.0000
  -1  10  -3   17179    1485                                                       17155    0.02    0.01  1.0000
  -1  10  -3   18415    1397                                                       18390    0.02    0.01  1.0000
  -1  10  -4     161     417                                                         332   -1.28   -0.01  1.0000
  -1  10  -4      99     501                                                         240   -1.28   -0.01  1.0000
  -1  10  -5    3215     878                                                        4257    2.02    0.01  1.0000
  -1  10  -5    3306     810                                                        4362    2.02    0.01  1.0000
  -1  10  -6    6986     889                                                        5584   -2.06    0.00  1.0000
  -1  10  -6    7147     928                                                        5728   -2.06    0.00  1.0000
  -1  10  -7      38     492                                                         115    1.65    0.00  1.0000
   1 -10   7      75     703                                                         187    1.65    0.00  1.0000
  -1  10  -8   20157    1557                                                       21345   -0.96    0.00  1.0000
   1 -10   8     136     868                                                         249   -0.96    0.00  1.0000
   1 -10   9      52     765                                                          40    0.22    0.00  1.0000
   1 -10  13      14    1117                                                         -97    0.88    0.01  1.0000
  -1   9  11     394     703                                                         394   -0.07    0.01  1.0000
  -1   9  10   14729    1662                                                       14812    0.08   -0.01  1.0000
  -1   9   9    2638     881                                                        2534   -0.24    0.01  1.0000
  -1   9   8    3719     897                                                        3414    0.60   -0.01  1.0000
  -1   9   7    1537     723                                                        1859   -0.91    0.00  1.0000
  -1   9   7    2055     686                                                        2425   -0.91    0.00  1.0000
  -1   9   6    1659     601                                                        1418    0.74    0.00  1.0000
  -1   9   6    1698     620                                                        1454    0.74    0.00  1.0000
  -1   9   5   12702    1277                                                       12682    0.02    0.01  1.0000
  -1   9   4   29539    1801                                                       28388   -0.79    0.00  1.0000
  -1   9   3   15457    1391                                                       16453    0.92   -0.01  1.0000
  -1   9   2   21496    1304                                                       22239   -0.59    0.01  1.0000
  -1   9   2   20077    1528                                                       20796   -0.59    0.01  1.0000
  -1   9   1   38506    2046                                                       37516    0.59   -0.01  1.0000
  -1   9   1   38314    1663                                                       37326    0.59   -0.01  1.0000
  -1   9   0    5419     906                                                        6224   -1.22    0.01  1.0000
  -1   9   0    5221     714                                                        6011   -1.22    0.01  1.0000
  -1   9  -1   55293    2543                                                       58775    1.70   -0.01  1.0000
  -1   9  -1   60630    2252                                                       64274    1.70   -0.01  1.0000
  -1   9  -2   14054    1227                                                       12895   -1.16    0.01  1.0000
  -1   9  -2   14709    1091                                                       13522   -1.16    0.01  1.0000
   1  -9   2   13273    1091                                                       12146   -1.16   -0.01  1.0000
  -1   9  -3    1908     637                                                        1967   -0.15   -0.01  1.0000
  -1   9  -3    1041     456                                                        1084   -0.15   -0.01  1.0000
  -1   9  -4    6905     867                                                        6012    1.29    0.00  1.0000
  -1   9  -4    7138     834                                                        6229    1.29    0.00  1.0000
  -1   9  -5   12174    1231                                                       13825   -1.69    0.01  1.0000
  -1   9  -5   12378    1207                                                       14043   -1.69    0.01  1.0000
  -1   9  -6    9287     986                                                        8119    1.46   -0.01  1.0000
  -1   9  -7   20358    1396                                                       19348   -0.84    0.01  1.0000
  -1   9  -8   14881    1229                                                       14845   -0.03   -0.01  1.0000
  -1   8  12     519     901                                                         462    0.36    0.01  1.0000
  -1   8  11     251     669                                                         173   -0.62   -0.01  1.0000
  -1   8  10    5302    1010                                                        4877    0.69    0.01  1.0000
  -1   8   9    2733     881                                                        2966   -0.51    0.00  1.0000
  -1   8   8   27336    1956                                                       27686    0.25   -0.01  1.0000
  -1   8   7    4354     750                                                        4237   -0.22    0.01  1.0000
  -1   8   7    4568     850                                                        4448   -0.22    0.01  1.0000
  -1   8   6    7335     910                                                        6960    0.52   -0.01  1.0000
  -1   8   6    7153     807                                                        6783    0.52   -0.01  1.0000
  -1   8   6    7550     976                                                        7170    0.52   -0.01  1.0000
  -1   8   5   68839    2374                                                       70616   -0.78    0.01  1.0000
  -1   8   5   72466    2685                                                       74289   -0.78    0.01  1.0000
  -1   8   4     325     327                                                         248    0.53   -0.01  1.0000
  -1   8   4     291     414                                                         218    0.53   -0.01  1.0000
  -1   8   3   64787    2472                                                       65161    0.17    0.01  1.0000
  -1   8   3   61378    2044                                                       61743    0.17    0.01  1.0000
  -1   8   2   20263    1391                                                       19582   -0.56   -0.01  1.0000
  -1   8   2   21251    1164                                                       20554   -0.56   -0.01  1.0000
  -1   8   1    3515     751                                                        3519    0.01    0.00  1.0000
  -1   8   1    4008     553                                                        4012    0.01    0.00  1.0000
  -1   8   0    1416     367                                                        1086    1.09    0.00  1.0000
  -1   8   0    1294     505                                                         980    1.09    0.00  1.0000
   1  -8   1   43099    1757                                                       46129   -1.67    0.00  1.0000
  -1   8  -1   41261    1768                                                       44228   -1.67    0.00  1.0000
  -1   8  -1   41565    2059                                                       44542   -1.67    0.00  1.0000
  -1   8  -2    9443     930                                                        8469    1.20    0.00  1.0000
  -1   8  -2   10280     855                                                        9263    1.20    0.00  1.0000
  -1   8  -3   34170    1616                                                       33813   -0.22   -0.01  1.0000
  -1   8  -3   31621    1674                                                       31277   -0.22   -0.01  1.0000
  -1   8  -4   57339    2134                                                       56383   -0.47    0.02  1.0000
  -1   8  -4   53588    2145                                                       52664   -0.47    0.02  1.0000
  -1   8  -5     187     375                                                         266    0.61   -0.01  1.0000
  -1   8  -6   50529    2096                                                       51163   -0.33    0.01  1.0000
  -1   8  -7    3109     620                                                        3233   -0.26    0.00  1.0000
  -1   8  -8    6498     822                                                        7130    0.89    0.00  1.0000
  -1   7  13    1865     904                                                        1704    0.45    0.00  1.0000
  -1   7  12    2786     942                                                        2408   -0.87    0.00  1.0000
  -1   7  11   16330    1756                                                       17683    1.21    0.00  1.0000
  -1   7  10    4460    1048                                                        5217   -1.27    0.00  1.0000
  -1   7   9   18611    1416                                                       17321    1.13   -0.01  1.0000
  -1   7   9   17335    1552                                                       16091    1.13   -0.01  1.0000
  -1   7   8    2256     557                                                        1846   -1.05    0.02  1.0000
  -1   7   8    3236     763                                                        2741   -1.05    0.02  1.0000
  -1   7   7   20499    1388                                                       21826    1.07   -0.01  1.0000
  -1   7   7   22627    1703                                                       24021    1.07   -0.01  1.0000
  -1   7   7   20203    1373                                                       21521    1.07   -0.01  1.0000
  -1   7   6    7230     900                                                        6644   -0.82    0.01  1.0000
  -1   7   6    6345     726                                                        5797   -0.82    0.01  1.0000
  -1   7   6    5343     723                                                        4841   -0.82    0.01  1.0000
  -1   7   5     104     298                                                         110   -0.08    0.00  1.0000
  -1   7   5      13     367                                                          16   -0.08    0.00  1.0000
  -1   7   4      41     379                                                         -42    1.49    0.00  1.0000
  -1   7   4     163     274                                                          42    1.49    0.00  1.0000
  -1   7   3   52052    2194                                                       57244   -2.58    0.00  1.0000
  -1   7   3   55446    1872                                                       60801   -2.58    0.00  1.0000
  -1   7   2   23133    1061                                                       20013    2.48   -0.01  1.0000
  -1   7   2   23213    1310                                                       20088    2.48   -0.01  1.0000
  -1   7   1   45377    1876                                                       43374   -1.10    0.01  1.0000
  -1   7   1   45452    1518                                                       43447   -1.10    0.01  1.0000
  -1   7   0   45117    1861                                                       43957   -0.64   -0.01  1.0000
  -1   7   0   44383    1541                                                       43233   -0.64   -0.01  1.0000
   1  -7   0   43967    1416                                                       42825   -0.64    0.01  1.0000
  -1   7  -1     537     429                                                         941    1.74    0.01  1.0000
   1  -7   1      56     285                                                         -33    1.74   -0.01  1.0000
  -1   7  -1     493     308                                                         882    1.74    0.01  1.0000
  -1   7  -2    9138     940                                                       10746   -1.92   -0.01  1.0000
  -1   7  -2    9650     865                                                       11301   -1.92   -0.01  1.0000
  -1   7  -3    3777     559                                                        2999    1.56    0.01  1.0000
  -1   7  -3    4358     536                                                        3519    1.56    0.01  1.0000
  -1   7  -4   23839    1310                                                       22383   -1.11   -0.01  1.0000
  -1   7  -5   16063    1154                                                       16955    0.81    0.00  1.0000
   1  -7   5      12     516                                                        -223    0.81    0.00  1.0000
   1  -7   6     191     648                                                         114   -0.72   -0.01  1.0000
  -1   7  -6    3903     587                                                        3522   -0.72    0.01  1.0000
   1  -7   7    4904    1552                                                        5385    0.78    0.01  1.0000
  -1   7  -7     169     291                                                         268    0.78   -0.01  1.0000
  -1   7  -8    7425     775                                                        7932   -0.67    0.01  1.0000
   1  -7  10      34     849                                                          59    0.43    0.00  1.0000
   1  -7  11       9     862                                                        -347   -0.70    0.01  1.0000
   1  -7  13       0    1080                                                        -988    0.13    0.00  1.0000
  -1   6  13   12113    1663                                                       12609   -0.52    0.00  1.0000
  -1   6  12     493     722                                                         679    0.90    0.00  1.0000
  -1   6  11    9143    1232                                                        8240   -1.13    0.01  1.0000
  -1   6  10     594     568                                                         382    1.14   -0.01  1.0000
  -1   6   9     385     601                                                         581   -1.12    0.01  1.0000
  -1   6   8   10028    1035                                                       11054    1.16    0.00  1.0000
  -1   6   8   11448    1292                                                       12542    1.16    0.00  1.0000
  -1   6   7     238     335                                                         376   -0.92    0.00  1.0000
  -1   6   7     322     474                                                         481   -0.92    0.00  1.0000
  -1   6   7     150     374                                                         264   -0.92    0.00  1.0000
  -1   6   6   39212    1700                                                       39414   -0.12    0.00  1.0000
  -1   6   6   36886    1633                                                       37082   -0.12    0.00  1.0000
  -1   6   5    1083     457                                                        1693    1.92   -0.01  1.0000
  -1   6   5    1108     418                                                        1725    1.92   -0.01  1.0000
  -1   6   5    1178     503                                                        1813    1.92   -0.01  1.0000
  -1   6   4   27757    1293                                                       22858   -3.60    0.01  1.0000
  -1   6   4   27722    1142                                                       22826   -3.60    0.01  1.0000
  -1   6   3    6322     471                                                        3854    4.04   -0.01  1.0000
  -1   6   3    6384     592                                                        3902    4.04   -0.01  1.0000
  -1   6   2   30396    1548                                                       34729   -2.80    0.01  1.0000
  -1   6   2   29162    1246                                                       33409   -2.80    0.01  1.0000
  -1   6   1     427     290                                                         344    0.49   -0.01  1.0000
  -1   6   1     521     211                                                         428    0.49   -0.01  1.0000
  -1   6   0   35071    1302                                                       38008    1.79    0.00  1.0000
  -1   6   0   33719    1579                                                       36601    1.79    0.00  1.0000
  -1   6  -1    1184     476                                                        2366   -3.31    0.00  1.0000
  -1   6  -1    1061     380                                                        2191   -3.31    0.00  1.0000
  -1   6  -2   26743    1194                                                       21468    3.95    0.00  1.0000
  -1   6  -2   28587    1072                                                       23122    3.95    0.00  1.0000
  -1   6  -3   13084     809                                                        9549   -3.88    0.00  1.0000
  -1   6  -4     256     251                                                           6    3.30   -0.01  1.0000
  -1   6  -5    5563     713                                                        7254   -2.48    0.01  1.0000
   1  -6   6     406     271                                                         718    1.61    0.01  1.0000
  -1   6  -6     408     303                                                         722    1.61   -0.01  1.0000
   1  -6   6      48     520                                                         -28    1.61    0.01  1.0000
   1  -6   7   10906     747                                                       10317   -0.67   -0.01  1.0000
  -1   6  -7   11531     816                                                       10927   -0.67    0.01  1.0000
  -1   6  -8    9850     762                                                        9597   -0.30    0.00  1.0000
   1  -6   9      13     693                                                         -29    0.84    0.00  1.0000
   1  -6  10     203     873                                                         271   -0.51   -0.01  1.0000
   1  -6  15      55     939                                                          32   -0.40    0.00  1.0000
  -1   5  14    1362     910                                                        1370   -0.03    0.00  1.0000
  -1   5  13    3407    1022                                                        3326    0.16    0.00  1.0000
  -1   5  12    1986     802                                                        1854   -0.36    0.00  1.0000
  -1   5  11       4     550                                                          -8    0.48    0.00  1.0000
  -1   5  10   14296    1450                                                       14897   -0.58    0.00  1.0000
  -1   5   9    6143     926                                                        5582    0.85    0.01  1.0000
  -1   5   8   25637    1639                                                       24092   -1.14   -0.01  1.0000
  -1   5   7    1538     480                                                        1841    0.86    0.01  1.0000
  -1   5   7    1435     586                                                        1729    0.86    0.01  1.0000
  -1   5   7    1269     385                                                        1545    0.86    0.01  1.0000
  -1   5   6    1033     457                                                         944    0.36    0.00  1.0000
  -1   5   6    1105     358                                                        1013    0.36    0.00  1.0000
  -1   5   6    1028     349                                                         940    0.36    0.00  1.0000
  -1   5   5   57382    1784                                                       53457   -1.94    0.00  1.0000
  -1   5   5   54057    1672                                                       50249   -1.94    0.00  1.0000
  -1   5   5   57298    1981                                                       53375   -1.94    0.00  1.0000
  -1   5   4   46121    1744                                                       51088    2.62    0.00  1.0000
  -1   5   4   47304    1593                                                       52333    2.62    0.00  1.0000
  -1   5   3   62317    1649                                                       65793   -1.60    0.00  1.0000
  -1   5   3   61125    1938                                                       64569   -1.60    0.00  1.0000
  -1   5   2   46709    1335                                                       47957   -0.67    0.01  1.0000
  -1   5   2   48974    1680                                                       50252   -0.67    0.01  1.0000
  -1   5   1     204     284                                                         460    2.89   -0.01  1.0000
  -1   5   1     224     189                                                         494    2.89   -0.01  1.0000
  -1   5   0    1096     252                                                        1337   -4.25    0.01  1.0000
  -1   5   0    1011     341                                                        1229   -4.25    0.01  1.0000
  -1   5  -1   31167     950                                                       24152    4.92   -0.01  1.0000
  -1   5  -1   29063    1111                                                       22304    4.92   -0.01  1.0000
  -1   5  -2    5265     726                                                        9110   -5.34    0.01  1.0000
  -1   5  -3   13827    1031                                                       19923    5.48   -0.01  1.0000
   1  -5   4     715     271                                                        2321   -4.98   -0.01  1.0000
  -1   5  -4     741     405                                                        2369   -4.98    0.01  1.0000
  -1   5  -5     828     373                                                        1960    3.73   -0.01  1.0000
   1  -5   5     697     281                                                        1753    3.73    0.01  1.0000
   1  -5   6    4717     424                                                        3648   -1.93    0.00  1.0000
  -1   5  -6    4622     455                                                        3564   -1.93    0.00  1.0000
  -1   5  -7   14790     831                                                       14838    0.05    0.00  1.0000
   1  -5   7   15487     919                                                       15536    0.05    0.00  1.0000
   1  -5   8    8156     708                                                        7285    1.15    0.01  1.0000
  -1   5  -8    7833     572                                                        6981    1.15   -0.01  1.0000
   1  -5   9   29782    1493                                                       31214   -0.95   -0.01  1.0000
   1  -5  10    2837     553                                                        2655   -0.41    0.01  1.0000
   1  -5  11    4157     762                                                        5079    1.59   -0.01  1.0000
   1  -5  12     866    1105                                                        1290   -1.51    0.00  1.0000
   1  -5  15     194     966                                                         167   -0.24    0.00  1.0000
   1  -5  16     298    1040                                                         290   -0.07    0.00  1.0000
  -1   4  14    1266     869                                                        1351   -0.28    0.01  1.0000
  -1   4  13    2177     929                                                        2081    0.24   -0.01  1.0000
  -1   4  12    6776    1167                                                        6698   -0.11    0.01  1.0000
  -1   4  11    3818     912                                                        3867   -0.09   -0.01  1.0000
  -1   4  10    6929    1002                                                        6550    0.54    0.01  1.0000
  -1   4   9   32604    1844                                                       30519   -1.37   -0.01  1.0000
  -1   4   8    8039    1050                                                        9837    2.23    0.01  1.0000
  -1   4   7   72383    2640                                                       78128   -2.44    0.01  1.0000
  -1   4   7   71088    1918                                                       76782   -2.44    0.01  1.0000
  -1   4   6   84900    2515                                                       80450    1.80   -0.02  1.0000
  -1   4   6   84981    2192                                                       80529    1.80   -0.02  1.0000
  -1   4   6   86732    1979                                                       82234    1.80   -0.02  1.0000
  -1   4   6   85577    2158                                                       81110    1.80   -0.02  1.0000
  -1   4   5   23299    1062                                                       21696   -1.25    0.02  1.0000
  -1   4   5   23789    1037                                                       22169   -1.25    0.02  1.0000
  -1   4   5   24636    1288                                                       22987   -1.25    0.02  1.0000
  -1   4   4  163922    2849                                                      170793    1.95   -0.02  1.0000
  -1   4   4  155625    2616                                                      162322    1.95   -0.02  1.0000
  -1   4   4  158154    3057                                                      164905    1.95   -0.02  1.0000
  -1   4   3    1927     220                                                         784   -3.81    0.02  1.0000
  -1   4   3    1759     250                                                         678   -3.81    0.02  1.0000
  -1   4   2   52638    1349                                                       63243    5.12   -0.01  1.0000
  -1   4   2   55426    1737                                                       66296    5.12   -0.01  1.0000
  -1   4   1   45540    1308                                                       37800   -4.40    0.01  1.0000
  -1   4   1   46265     967                                                       38461   -4.40    0.01  1.0000
  -1   4   0   13901     736                                                       11658    2.31   -0.01  1.0000
  -1   4   0   13912     539                                                       11668    2.31   -0.01  1.0000
  -1   4  -1     116     198                                                         182   -1.00    0.00  1.0000
  -1   4  -1      32     132                                                          63   -1.00    0.00  1.0000
  -1   4  -2   34309    1249                                                       37023    1.67    0.00  1.0000
  -1   4  -3    4204     527                                                        6087   -3.30    0.00  1.0000
   1  -4   3    4467     338                                                        6406   -3.30    0.00  1.0000
  -1   4  -4   50831    1305                                                       43425    3.97    0.01  1.0000
   1  -4   4   53336    1040                                                       45744    3.97   -0.01  1.0000
   1  -4   5  148487    2257                                                      158137   -2.87    0.01  1.0000
  -1   4  -5  153839    2443                                                      163662   -2.87   -0.01  1.0000
   1  -4   6    4673     494                                                        5097    0.70    0.00  1.0000
  -1   4  -6    4867     457                                                        5300    0.70    0.00  1.0000
  -1   4  -7   96089    1765                                                       99098    1.12    0.00  1.0000
   1  -4   7   96386    2284                                                       99400    1.12    0.00  1.0000
   1  -4   8    5947     615                                                        4989   -1.51    0.00  1.0000
  -1   4  -8    5613     380                                                        4683   -1.51    0.00  1.0000
   1  -4   9     199     324                                                         224    0.43    0.00  1.0000
   1  -4  10   16396    1174                                                       15443    0.88    0.00  1.0000
   1  -4  10      22    1072                                                           1    0.88    0.00  1.0000
   1  -4  11    1122     530                                                        1415   -0.96    0.00  1.0000
   1  -4  11      17    1124                                                        -785   -0.96    0.00  1.0000
   1  -4  12     593     524                                                         657   -0.32    0.01  1.0000
   1  -4  13    8482    1193                                                        9795    1.60   -0.01  1.0000
   1  -4  14     521    1037                                                         249   -1.66    0.01  1.0000
   1  -4  16     396    1172                                                         401   -0.03    0.00  1.0000
   1  -4  17     124    1301                                                         117    0.07    0.00  1.0000
  -1   3  15     460     727                                                         508   -0.26    0.01  1.0000
  -1   3  14       2     653                                                         -24    0.30   -0.01  1.0000
  -1   3  13   24809    2030                                                       24476   -0.25    0.00  1.0000
  -1   3  12   11604    1428                                                       11681    0.08    0.00  1.0000
  -1   3  11   24830    1852                                                       24463    0.27    0.00  1.0000
  -1   3  10   92379    3341                                                       95286   -1.10    0.00  1.0000
  -1   3   9    2667     757                                                        3885    2.53    0.00  1.0000
  -1   3   8   84870    2622                                                       75143   -4.01    0.01  1.0000
  -1   3   7    3712     811                                                        6587    4.70   -0.02  1.0000
  -1   3   7    2895     499                                                        5481    4.70   -0.02  1.0000
  -1   3   6   44033    1427                                                       52637   -4.55    0.03  1.0000
  -1   3   6   48010    2051                                                       56978   -4.55    0.03  1.0000
  -1   3   5    1045     178                                                         154    4.68   -0.03  1.0000
  -1   3   5    1320     330                                                         272    4.68   -0.03  1.0000
  -1   3   5     407     249                                                         -17    4.68   -0.03  1.0000
  -1   3   5    1210     229                                                         223    4.68   -0.03  1.0000
  -1   3   4   81053    1841                                                       95743   -5.74    0.02  1.0000
  -1   3   4   82703    1918                                                       97535   -5.74    0.02  1.0000
  -1   3   4   84212    2298                                                       99174   -5.74    0.02  1.0000
  -1   3   3    8477     461                                                        4336    6.18   -0.01  1.0000
  -1   3   3    9708     410                                                        5231    6.18   -0.01  1.0000
  -1   3   3    8711     424                                                        4504    6.18   -0.01  1.0000
  -1   3   2  110950    1502                                                      101703   -3.30    0.00  1.0000
  -1   3   2  113282    1907                                                      103936   -3.30    0.00  1.0000
  -1   3   2  117769    1889                                                      108236   -3.30    0.00  1.0000
  -1   3   1  173242    1571                                                      162024   -3.19    0.01  1.0000
  -1   3   1  156245    2220                                                      145600   -3.19    0.01  1.0000
  -1   3   0   14646     926                                                       26208    9.57   -0.01  1.0000
  -1   3   0   13296     600                                                       24390    9.57   -0.01  1.0000
  -1   3  -1  904907    5578                                                      999999  -11.32    0.01  1.0000
  -1   3  -2   75144    1701                                                       94630    7.77   -0.01  1.0000
   1  -3   3  109829    1288                                                      102592   -2.59   -0.01  1.0000
  -1   3  -3  111475    1722                                                      104187   -2.59    0.01  1.0000
  -1   3  -4   13349     608                                                       13086   -0.27   -0.01  1.0000
   1  -3   4   12295     555                                                       12043   -0.27    0.01  1.0000
  -1   3  -5   30940     867                                                       30921    0.01    0.00  1.0000
   1  -3   5   29619    1036                                                       29600    0.01    0.00  1.0000
  -1   3  -6   32077     811                                                       30060    1.33    0.01  1.0000
   1  -3   6   31680    1170                                                       29677    1.33   -0.01  1.0000
  -1   3  -7   17864     614                                                       19881   -1.71   -0.01  1.0000
   1  -3   7   19615    1115                                                       21725   -1.71    0.01  1.0000
   1  -3   8   25628    1292                                                       24528    0.81   -0.01  1.0000
   1  -3   9   44249    1873                                                       44627    0.21    0.01  1.0000
   1  -3  10   71711    2510                                                       71558   -0.07    0.00  1.0000
   1  -3  11    3389     731                                                        4111   -1.37    0.01  1.0000
   1  -3  12   72051    2688                                                       65510    2.91   -0.01  1.0000
   1  -3  12     157     997                                                         -18    2.91   -0.01  1.0000
   1  -3  13    2608     867                                                        4176   -3.17    0.01  1.0000
   1  -3  14    8371    1263                                                       10021    2.01    0.00  1.0000
   1  -3  15    7784    1224                                                        7379   -0.54    0.00  1.0000
  -1   2  15   13323    1630                                                       13260    0.06    0.00  1.0000
  -1   2  14   26391    2144                                                       26526   -0.10    0.00  1.0000
  -1   2  13    4941    1080                                                        5042    0.17    0.01  1.0000
  -1   2  12   36319    2264                                                       35950   -0.23   -0.01  1.0000
  -1   2  11   34004    2090                                                       34026    0.01    0.01  1.0000
  -1   2  10    2215     704                                                        1865    0.91   -0.01  1.0000
  -1   2   9   11650    1239                                                       14175   -2.58    0.01  1.0000
  -1   2   8     804     333                                                         109    4.16   -0.01  1.0000
  -1   2   8   31007    1520                                                       25026    4.16   -0.01  1.0000
  -1   2   7    8207    1006                                                       12269   -4.71    0.01  1.0000
  -1   2   7    7952     622                                                       11957   -4.71    0.01  1.0000
  -1   2   6   13860     755                                                       18724    4.49   -0.02  1.0000
  -1   2   6   13780    1135                                                       18631    4.49   -0.02  1.0000
  -1   2   5   64076    1769                                                       54503   -4.61    0.01  1.0000
  -1   2   5   63324    1262                                                       53810   -4.61    0.01  1.0000
  -1   2   4  191939    2854                                                      174821    4.64   -0.01  1.0000
  -1   2   4  185632    2178                                                      168804    4.64   -0.01  1.0000
  -1   2   3  411996    3266                                                      420572   -1.55   -0.01  1.0000
  -1   2   3  374645    3810                                                      382826   -1.55   -0.01  1.0000
  -1   2   2  122700    1874                                                      145253   -7.15    0.01  1.0000
  -1   2   2  128381    2045                                                      151428   -7.15    0.01  1.0000
  -1   2   1   50858    1291                                                       93589   18.81   -0.01  1.0000
  -1   2   1   52846    1485                                                       96281   18.81   -0.01  1.0000
  -1   2   0  472728    2645                                                      330007  -26.25    0.01  1.0000
  -1   2  -1   34366     371                                                        6452   24.40    0.00  1.0000
  -1   2  -2  174576    2099                                                      234834  -15.49    0.00  1.0000
   1  -2   2  180737    1625                                                      241972  -15.49    0.00  1.0000
   1  -2   3   48233     878                                                       36723    6.50    0.00  1.0000
  -1   2  -3   47956     796                                                       36482    6.50    0.00  1.0000
  -1   2  -4    1498     202                                                        2235   -2.10    0.00  1.0000
   1  -2   4    1617     299                                                        2379   -2.10    0.00  1.0000
   1  -2   5     296     223                                                         498    1.41   -0.01  1.0000
  -1   2  -5     364     108                                                         589    1.41    0.01  1.0000
   1  -2   6   92749    2089                                                       90042   -1.05    0.01  1.0000
   1  -2   7   12179     865                                                       11806   -0.40   -0.01  1.0000
   1  -2   7   60176    4482                                                       59344   -0.40   -0.01  1.0000
   1  -2   8  243938    4092                                                      237070    1.63    0.01  1.0000
   1  -2   9  101032    2899                                                      104026   -1.09    0.00  1.0000
   1  -2  10   56197    2240                                                       54071   -1.05    0.00  1.0000
   1  -2  11   22006    1705                                                       26202    3.15    0.00  1.0000
   1  -2  11      80    1415                                                         502    3.15    0.00  1.0000
   1  -2  12     257     485                                                         -80   -3.72    0.00  1.0000
   1  -2  13     450    1038                                                          94    2.67    0.01  1.0000
   1  -2  13    1369     574                                                         651    2.67    0.01  1.0000
   1  -2  14    1317     741                                                        1655   -1.02   -0.01  1.0000
   1  -2  15   10293    1408                                                       10392   -0.12    0.01  1.0000
   1  -2  16     180     739                                                         145    0.44   -0.01  1.0000
   1  -2  17    7707    1488                                                        7462   -0.33    0.00  1.0000
  -1   1  16   11364    1611                                                       11286   -0.09    0.01  1.0000
  -1   1  15     461     731                                                         474    0.07   -0.01  1.0000
  -1   1  14    1368     770                                                        1290    0.25    0.01  1.0000
  -1   1  13     235     583                                                         359   -0.85   -0.01  1.0000
  -1   1  12   24933    1777                                                       22928    1.51    0.00  1.0000
  -1   1  11   22988    1775                                                       25224   -1.68    0.00  1.0000
  -1   1  10   51656    2414                                                       53352    0.86    0.00  1.0000
  -1   1   9  133531    3589                                                      135702    0.69    0.00  1.0000
  -1   1   8   11171    1104                                                       12985   -1.92    0.00  1.0000
  -1   1   7   64968    1194                                                       60301    2.19    0.00  1.0000
  -1   1   7   64440    2111                                                       59792    2.19    0.00  1.0000
  -1   1   6   14202     899                                                       12080   -2.15    0.00  1.0000
  -1   1   6   14305     538                                                       12174   -2.15    0.00  1.0000
  -1   1   5   60977    1880                                                       66278    2.45    0.00  1.0000
  -1   1   5   61158    1210                                                       66468    2.45    0.00  1.0000
  -1   1   4    2271     215                                                        1811   -1.19    0.00  1.0000
  -1   1   4    1981     311                                                        1554   -1.19    0.00  1.0000
  -1   1   3   44151    1362                                                       54402   -5.37    0.01  1.0000
  -1   1   3   46705    1042                                                       57233   -5.37    0.01  1.0000
  -1   1   2  125483    1354                                                       77162   17.74   -0.01  1.0000
  -1   1   2  127879    1194                                                       79043   17.74   -0.01  1.0000
  -1   1   1  107440    1735                                                      208353  -29.87    0.00  1.0000
  -1   1   1  109820    1856                                                      211663  -29.87    0.00  1.0000
  -1   1   0  208712    1211                                                       98363   33.29    0.00  1.0000
  -1   1  -1  287123    1561                                                      181267  -25.55   -0.01  1.0000
   1  -1   1  284758    1536                                                      179390  -25.55    0.01  1.0000
   1  -1   2  160914    2131                                                      208181   12.84   -0.01  1.0000
  -1   1  -2  162245    1606                                                      209699   12.84    0.01  1.0000
  -1   1  -3       9      80                                                         315   -3.43   -0.01  1.0000
   1  -1   3       4     185                                                         280   -3.43    0.01  1.0000
   1  -1   5   53633    1526                                                       51520    1.07    0.01  1.0000
   1  -1   6  139117    2681                                                      130233   -2.81    0.00  1.0000
   1  -1   7   15463    1191                                                       21023    4.80    0.00  1.0000
   1  -1   8     691    1356                                                          41   -4.62    0.00  1.0000
   1  -1   8   11698     838                                                        7794   -4.62    0.00  1.0000
   1  -1   9      84     359                                                         177    1.81    0.00  1.0000
   1  -1  10   19729    1361                                                       18006    1.46    0.00  1.0000
   1  -1  11   28860    1935                                                       33251   -2.90    0.00  1.0000
   1  -1  12      93     549                                                         371    2.25    0.01  1.0000
   1  -1  13   12576    1338                                                       11808   -0.82   -0.01  1.0000
   1  -1  14    5940    1106                                                        5838   -0.16    0.01  1.0000
   1  -1  15   11601    1484                                                       11198    0.44    0.00  1.0000
   1  -1  16    4206    1165                                                        4433   -0.40    0.00  1.0000
  -1   0  16    4631    1206                                                        4555    0.13   -0.01  1.0000
  -1   0  15    4577    1060                                                        4494    0.14    0.01  1.0000
  -1   0  14    3756     976                                                        3258   -0.99    0.00  1.0000
  -1   0  13   18102    1772                                                       20767    2.24    0.00  1.0000
  -1   0  12     375     603                                                        1111   -3.32    0.00  1.0000
  -1   0  11   38949    1968                                                       33205    3.54    0.00  1.0000
  -1   0  11     429     513                                                          30    3.54    0.00  1.0000
  -1   0  10     132     481                                                           0   -2.66    0.00  1.0000
  -1   0  10     220     399                                                          13   -2.66    0.00  1.0000
  -1   0   9    6494     889                                                        7385    1.26   -0.01  1.0000
  -1   0   8    4393     658                                                        4317   -0.13    0.01  1.0000
  -1   0   7    5124     328                                                        5582   -0.73    0.00  1.0000
  -1   0   7    5420     684                                                        5891   -0.73    0.00  1.0000
  -1   0   6   14527    1017                                                       16728    2.05    0.00  1.0000
  -1   0   6   15103     583                                                       17346    2.05    0.00  1.0000
  -1   0   5     172     151                                                         744   -3.30    0.00  1.0000
  -1   0   5     352     307                                                        1085   -3.30    0.00  1.0000
  -1   0   4   36023     792                                                       33740    1.43    0.00  1.0000
  -1   0   4   35456    1148                                                       33192    1.43    0.00  1.0000
  -1   0   3  253859    2224                                                      282379    6.39    0.01  1.0000
  -1   0   3  240512    2878                                                      268292    6.39    0.01  1.0000
  -1   0   2   53221     639                                                       23878  -17.92   -0.01  1.0000
  -1   0   2   53311     734                                                       23938  -17.92   -0.01  1.0000
  -1   0   2   56813     719                                                       26309  -17.92   -0.01  1.0000
  -1   0   1   16421     111                                                         323   25.58    0.01  1.0000
  -1   0   1   16803     106                                                         379   25.58    0.01  1.0000
   1   0   0   16838    1053                                                       52427  -23.21    0.01  1.0000
  -1   0   0   19265    1092                                                       56661  -23.21   -0.01  1.0000
  -1   0  -1   18785     319                                                        6796   12.69    0.00  1.0000
   1   0   1   20124     388                                                        7611   12.69    0.00  1.0000
   1   0   2   10273     581                                                       12056   -2.01    0.00  1.0000
   1   0   3   92785    1705                                                       84899   -3.07    0.00  1.0000
   1   0   4     793     213                                                         297    3.77    0.00  1.0000
   1   0   5    1877     498                                                        3865   -4.46    0.01  1.0000
   1   0   6     674     484                                                        2877    6.49   -0.02  1.0000
   1   0   7    7998    1043                                                       14604   -7.38    0.01  1.0000
   1   0   8     491     339                                                         -47    5.14    0.00  1.0000
   1   0   8     523    1196                                                          25    5.14    0.00  1.0000
   1   0   9   22899    1423                                                       21360   -1.21   -0.01  1.0000
   1   0  10   31834    1772                                                       29727   -1.40    0.01  1.0000
   1   0  11   21403    1533                                                       19621    1.46   -0.01  1.0000
   1   0  12    3470     833                                                        3603   -0.26    0.00  1.0000
   1   0  13   13838    1448                                                       13343   -0.49    0.00  1.0000
   1   0  14     575     734                                                         670    0.45    0.01  1.0000
   1   0  15    1580     861                                                        1646   -0.19   -0.01  1.0000
   1   0  16       0     702                                                        -308    0.12    0.01  1.0000
  -1  -1  16     873     852                                                         849   -0.10    0.00  1.0000
  -1  -1  15    3492     971                                                        3687   -0.38    0.01  1.0000
  -1  -1  14     381     633                                                         683    1.56   -0.01  1.0000
  -1  -1  13    1404     593                                                         698   -2.93    0.01  1.0000
  -1  -1  12    5295     783                                                        3237    3.71    0.00  1.0000
  -1  -1  11   17584    1602                                                       21785   -3.48    0.00  1.0000
  -1  -1  10     114     509                                                        -101    2.48    0.00  1.0000
  -1  -1  10    1217     588                                                        2025    2.48    0.00  1.0000
  -1  -1   9     409     393                                                         230   -1.18    0.00  1.0000
  -1  -1   8   17575    1211                                                       18011   -0.38    0.00  1.0000
  -1  -1   7    1519     492                                                        2563    2.71    0.00  1.0000
  -1  -1   6   73499    1861                                                       60634   -5.79    0.01  1.0000
  -1  -1   6     847     341                                                          17   -5.79    0.01  1.0000
  -1  -1   5     111     366                                                        1942    7.79   -0.01  1.0000
  -1  -1   4   20934    1062                                                       28747   -5.81    0.01  1.0000
  -1  -1   3   40063    1141                                                       41500   -0.83   -0.01  1.0000
  -1  -1   2   40489    1189                                                       55764    8.14    0.01  1.0000
  -1  -1   2   42445    1266                                                       58055    8.14    0.01  1.0000
   1   1  -1     857     371                                                        5252  -10.30    0.00  1.0000
   1   1   0   95742    1382                                                       81444    5.59    0.01  1.0000
   1   1   1   54677    1257                                                       57657    1.46   -0.01  1.0000
   1   1   2   57984    1252                                                       47904   -5.10    0.01  1.0000
   1   1   3   24321     878                                                       18778    4.41   -0.01  1.0000
   1   1   4   70932    1917                                                       78152   -3.07    0.01  1.0000
   1   1   5   17631    1127                                                       22364    3.91   -0.02  1.0000
   1   1   6    2462     360                                                         701   -5.58    0.01  1.0000
   1   1   7   28011    1278                                                       21123    5.14    0.00  1.0000
   1   1   7   27023     610                                                       20266    5.14    0.00  1.0000
   1   1   8    3349     569                                                        2321   -2.25   -0.02  1.0000
   1   1   9     303    1275                                                         225   -0.56    0.03  1.0000
   1   1   9   18296    1372                                                       17655   -0.56    0.03  1.0000
   1   1  10      27    1491                                                        -529    1.20   -0.02  1.0000
   1   1  10    2133     584                                                        1686    1.20   -0.02  1.0000
   1   1  11    8675    1125                                                        8789   -0.15    0.01  1.0000
   1   1  12      28     574                                                          70   -0.74   -0.01  1.0000
   1   1  13   10996    1394                                                       11561    0.62    0.01  1.0000
   1   1  14     218     635                                                         205   -0.11   -0.01  1.0000
   1   1  15    2577     985                                                        2625   -0.11    0.00  1.0000
  -1  -2  17     170     780                                                         151   -0.18   -0.01  1.0000
  -1  -2  16    9273    1474                                                        8977    0.36    0.01  1.0000
  -1  -2  15    2458     885                                                        2431    0.06   -0.01  1.0000
  -1  -2  14   11077    1332                                                       10139   -1.06    0.00  1.0000
  -1  -2  13    3973     946                                                        5071    1.91    0.00  1.0000
  -1  -2  12      76     526                                                         -78   -2.02   -0.01  1.0000
  -1  -2  11     968     518                                                         603    1.55    0.01  1.0000
  -1  -2  10      69     416                                                          21   -0.92   -0.01  1.0000
  -1  -2   9    1751     505                                                        1778   -0.07    0.01  1.0000
  -1  -2   8   50993    1883                                                       46904    2.15   -0.01  1.0000
  -1  -2   7   39122    1412                                                       30314   -5.51    0.00  1.0000
  -1  -2   6   30740    1623                                                       45741    8.97    0.00  1.0000
  -1  -2   5   63607    2051                                                       88029  -10.34    0.00  1.0000
  -1  -2   4    1278     217                                                         -19    8.30    0.00  1.0000
  -1  -2   4   58901    1307                                                       42912    8.30    0.00  1.0000
  -1  -2   3   49391    1219                                                       41655   -4.22    0.00  1.0000
  -1  -2   3     331     211                                                         -13   -4.22    0.00  1.0000
  -1  -2   2  223372    2852                                                      229490    1.49    0.01  1.0000
   1   2  -1   46067    1326                                                       50108   -2.14    0.01  1.0000
   1   2   0   10712     500                                                        7177    4.41   -0.01  1.0000
   1   2   1   52909    1242                                                       43969   -4.72    0.01  1.0000
   1   2   2   40966    1238                                                       37626    1.96   -0.01  1.0000
   1   2   3    3000     388                                                        2452    1.25    0.00  1.0000
   1   2   4   10138     703                                                        8577   -1.88   -0.01  1.0000
   1   2   5   63981    1960                                                       64270    0.13    0.00  1.0000
   1   2   6    9638     814                                                        8605    1.26    0.00  1.0000
   1   2   7  176770    2387                                                      178994   -0.61   -0.02  1.0000
   1   2   7  183816    3735                                                      186084   -0.61   -0.02  1.0000
   1   2   8    9537     944                                                        8751   -0.95    0.03  1.0000
   1   2   8    8763     956                                                        8010   -0.95    0.03  1.0000
   1   2   9   49609    2351                                                       52298    1.39   -0.03  1.0000
   1   2  10    3016     780                                                        3180   -0.34    0.02  1.0000
   1   2  11    5099     980                                                        5608   -0.82    0.00  1.0000
   1   2  12     153     654                                                         274    0.97    0.00  1.0000
   1   2  13      21     627                                                          41   -0.42    0.00  1.0000
   1   2  14    2989     954                                                        2980    0.02    0.00  1.0000
   1   2  15    4052    1092                                                        4065    0.02    0.01  1.0000
  -1  -3  17    5588    1396                                                        5956    0.56    0.00  1.0000
  -1  -3  16    1272     854                                                         998   -0.95    0.00  1.0000
  -1  -3  15      11     791                                                        -150    0.76   -0.01  1.0000
  -1  -3  15    2283     848                                                        1985    0.76   -0.01  1.0000
  -1  -3  14      47     549                                                          59   -0.21    0.01  1.0000
  -1  -3  13       0     590                                                         -92   -0.05   -0.01  1.0000
  -1  -3  12     201     522                                                         199   -0.02    0.01  1.0000
  -1  -3  11   15475    1351                                                       15415   -0.06    0.00  1.0000
  -1  -3  10   27775    1695                                                       28153    0.26    0.00  1.0000
  -1  -3   9   45280    1990                                                       44672    0.33    0.00  1.0000
  -1  -3   8   90897    2745                                                       97388   -2.46    0.00  1.0000
  -1  -3   7    3040     703                                                        6126    5.41    0.01  1.0000
  -1  -3   6  186674    3035                                                      160331   -7.36   -0.01  1.0000
  -1  -3   5   56868    1905                                                       72463    7.13    0.01  1.0000
  -1  -3   5     944     416                                                        -524    7.13    0.01  1.0000
  -1  -3   4   26102    1259                                                       34197   -5.44   -0.01  1.0000
  -1  -3   3     196     172                                                          86    4.23    0.00  1.0000
   1   3  -2     810     359                                                        2263   -4.51    0.00  1.0000
  -1  -3   2     666     336                                                        2016   -4.51    0.00  1.0000
   1   3  -1     954     212                                                         413    4.99    0.00  1.0000
   1   3   0   20685     854                                                       16733   -3.39    0.00  1.0000
   1   3   1  263142    3345                                                      259960   -0.72    0.01  1.0000
   1   3   2    1947     271                                                         696    4.95   -0.01  1.0000
   1   3   3  301403    4211                                                      332703   -6.47    0.01  1.0000
   1   3   4     327     376                                                        1553    4.95   -0.01  1.0000
   1   3   5  241127    3879                                                      230262   -2.60    0.01  1.0000
   1   3   6   26271    1452                                                       28347    1.46   -0.01  1.0000
   1   3   6   27981    1752                                                       30123    1.46   -0.01  1.0000
   1   3   7    9824     992                                                       11111   -1.47    0.01  1.0000
   1   3   7   10693     756                                                       12034   -1.47    0.01  1.0000
   1   3   8     599     408                                                         377    1.23   -0.01  1.0000
   1   3   9    2133     632                                                        2168   -0.09    0.00  1.0000
   1   3   9    2562     667                                                        2600   -0.09    0.00  1.0000
   1   3  10   11667    1356                                                       12785   -1.18    0.00  1.0000
   1   3  11    3739     951                                                        4611    1.58   -0.01  1.0000
   1   3  12   31260    2139                                                       29596   -1.12    0.01  1.0000
   1   3  13    1549     798                                                        1364    0.56   -0.01  1.0000
   1   3  14   29152    2332                                                       29652   -0.34    0.01  1.0000
  -1  -4  16      31     966                                                         -56    1.30   -0.01  1.0000
  -1  -4  15   10498    1405                                                        9391   -1.30    0.01  1.0000
  -1  -4  15     523     860                                                         300   -1.30    0.01  1.0000
  -1  -4  14     230     879                                                         391    1.08   -0.01  1.0000
  -1  -4  14    4787    1087                                                        5445    1.08   -0.01  1.0000
  -1  -4  13   21203    1830                                                       22324   -0.88    0.00  1.0000
  -1  -4  12    5130     905                                                        4841    0.49    0.01  1.0000
  -1  -4  11    4610     832                                                        4785    0.30   -0.01  1.0000
  -1  -4  10   68967    2573                                                       67007   -0.88    0.00  1.0000
  -1  -4   9   30056    1656                                                       30482    0.28    0.00  1.0000
  -1  -4   8    9412     855                                                        8279    1.40    0.00  1.0000
  -1  -4   7   45465    1880                                                       50745   -2.80   -0.01  1.0000
  -1  -4   6     132     413                                                          -4    2.67    0.01  1.0000
  -1  -4   6   55575    1778                                                       50290    2.67    0.01  1.0000
  -1  -4   5   12492     917                                                       13968   -1.49    0.00  1.0000
   1   4  -3   61203    1820                                                       56639   -2.20   -0.01  1.0000
  -1  -4   3   66086    1938                                                       61343   -2.20    0.01  1.0000
   1   4  -2   10245     674                                                        7320    3.67    0.01  1.0000
   1   4  -1   64191    1979                                                       70992   -3.06   -0.01  1.0000
   1   4   0   32987    1356                                                       33489   -0.32    0.02  1.0000
   1   4   1  292013    4052                                                      312764    4.39   -0.02  1.0000
   1   4   2  180205    3020                                                      158004   -6.27    0.01  1.0000
   1   4   3   39295    1379                                                       30917    5.20   -0.01  1.0000
   1   4   4   41452    1757                                                       46673   -2.89    0.00  1.0000
   1   4   5   23968    1292                                                       22242    1.32    0.00  1.0000
   1   4   6   11608    1040                                                       12384   -0.83    0.00  1.0000
   1   4   7   17877    1083                                                       18374    0.43    0.01  1.0000
   1   4   7   20711    1392                                                       21245    0.43    0.01  1.0000
   1   4   8   78973    2789                                                       80279    0.54   -0.01  1.0000
   1   4   9   21052    1464                                                       19042   -1.65    0.01  1.0000
   1   4   9   20683    1536                                                       18690   -1.65    0.01  1.0000
   1   4  10  103741    3608                                                       98022    2.10   -0.01  1.0000
   1   4  10   94612    3254                                                       89153    2.10   -0.01  1.0000
   1   4  11   12875    1557                                                       14633   -1.75    0.00  1.0000
   1   4  12   34463    2452                                                       36305    1.14    0.00  1.0000
   1   4  13    5225    1101                                                        4769   -0.76    0.00  1.0000
   1   4  14       6     743                                                         -82    0.55    0.00  1.0000
  -1  -5  15      21    1058                                                        -962    1.07    0.00  1.0000
  -1  -5  14     372    1043                                                         245   -0.85    0.00  1.0000
  -1  -5  13       3     851                                                        -215    0.39    0.01  1.0000
  -1  -5  13    3216     844                                                        3406    0.39    0.01  1.0000
  -1  -5  12    5761     962                                                        5554    0.32   -0.01  1.0000
  -1  -5  12       2     844                                                        -725    0.32   -0.01  1.0000
  -1  -5  11      34     672                                                          96   -0.94    0.01  1.0000
  -1  -5  11    1869     657                                                        2232   -0.94    0.01  1.0000
  -1  -5  10      14     638                                                        -203    0.86    0.00  1.0000
  -1  -5  10    9364    1000                                                        8666    0.86    0.00  1.0000
  -1  -5   9       0     703                                                        -135    0.03    0.00  1.0000
  -1  -5   9    1517     506                                                        1506    0.03    0.00  1.0000
  -1  -5   8   55771    2128                                                       53987   -0.88    0.00  1.0000
  -1  -5   8      15     617                                                        -615   -0.88    0.00  1.0000
  -1  -5   7      11     600                                                          36    0.65    0.00  1.0000
  -1  -5   7   91834    2668                                                       93536    0.65    0.00  1.0000
  -1  -5   6    3394     524                                                        3118    0.57    0.01  1.0000
  -1  -5   4     700     420                                                         643    0.25    0.01  1.0000
   1   5  -3   59618    2112                                                       64016    2.06    0.00  1.0000
  -1  -5   3   57924    2083                                                       62258    2.06    0.00  1.0000
   1   5  -2    3441     443                                                        1956   -3.44    0.00  1.0000
   1   5  -1   11215     799                                                        9182    2.34    0.01  1.0000
   1   5   0    7163     705                                                        6906    0.36   -0.01  1.0000
   1   5   1   90657    2439                                                       96452   -2.20    0.00  1.0000
   1   5   2    3157     481                                                        2348    1.86    0.01  1.0000
   1   5   3   23055    1282                                                       22646   -0.31   -0.01  1.0000
   1   5   4  114335    2897                                                      112430   -0.66    0.00  1.0000
   1   5   5      72     366                                                         116    0.55   -0.01  1.0000
   1   5   6  173812    3893                                                      174592   -0.22    0.01  1.0000
   1   5   7    4753     756                                                        4470    0.49   -0.01  1.0000
   1   5   7    4267     588                                                        3999    0.49   -0.01  1.0000
   1   5   8    4621     776                                                        3976   -1.20    0.01  1.0000
   1   5   9   25459    1799                                                       27755    1.64    0.00  1.0000
   1   5  10      43     523                                                        -159   -1.52   -0.01  1.0000
   1   5  10     229     555                                                          87   -1.52   -0.01  1.0000
   1   5  11     864     643                                                         604    1.12    0.01  1.0000
   1   5  11     698     642                                                         467    1.12    0.01  1.0000
   1   5  12    1042     828                                                        1279   -0.81   -0.01  1.0000
   1   5  13   10286    1514                                                        9761    0.61    0.00  1.0000
  -1  -6  12      14     843                                                         -71   -0.87    0.00  1.0000
  -1  -6  10     291     831                                                         219    0.53   -0.01  1.0000
  -1  -6  10    1391     569                                                        1227    0.53   -0.01  1.0000
  -1  -6   9   44602    2179                                                       46899   -1.25    0.01  1.0000
  -1  -6   8     157     386                                                         277    0.98    0.00  1.0000
  -1  -6   7   12814    1052                                                       13002    0.19    0.01  1.0000
  -1  -6   5     118     464                                                          48    0.92    0.00  1.0000
  -1  -6   4     346     354                                                         221    0.87    0.00  1.0000
   1   6  -4     593     383                                                         424    0.87    0.00  1.0000
   1   6  -3    4856     818                                                        6759   -2.91    0.01  1.0000
   1   6  -2   50309    1868                                                       43515    3.65   -0.01  1.0000
   1   6  -1     300     390                                                         828   -2.76    0.00  1.0000
   1   6   0  103511    2838                                                      107740    1.51    0.00  1.0000
   1   6   1     646     393                                                         950   -1.27    0.01  1.0000
   1   6   2   40187    1708                                                       37018    1.88   -0.01  1.0000
   1   6   3   26310    1535                                                       29329   -2.10    0.01  1.0000
   1   6   4   22702    1453                                                       24342    1.25    0.00  1.0000
   1   6   5   21412    1404                                                       21445    0.03    0.00  1.0000
   1   6   6   13515    1240                                                       14209   -0.68    0.00  1.0000
   1   6   7    1104     572                                                        1257    0.52    0.00  1.0000
   1   6   8    1064     576                                                        1085   -0.08    0.01  1.0000
   1   6   9   18908    1608                                                       19107   -0.17   -0.01  1.0000
   1   6  10       1     680                                                        -124    0.23    0.01  1.0000
   1   6  10     142     561                                                         124    0.23    0.01  1.0000
   1   6  11   14985    1711                                                       14660   -0.31   -0.01  1.0000
   1   6  11   13116    1466                                                       12813   -0.31   -0.01  1.0000
   1   6  12    4605    1194                                                        4828    0.38    0.00  1.0000
  -1  -7  15     438    1214                                                         397   -0.23   -0.01  1.0000
  -1  -7   9      90     734                                                          11    1.44    0.00  1.0000
  -1  -7   6    1448     667                                                        1072    1.25   -0.01  1.0000
  -1  -7   5    2941     671                                                        2781   -0.35    0.01  1.0000
   1   7  -5    2896     639                                                        2737   -0.35   -0.01  1.0000
   1   7  -4   39975    1950                                                       38111   -1.10    0.02  1.0000
   1   7  -3    1585     584                                                        2428    2.20   -0.01  1.0000
   1   7  -2   17105    1365                                                       19936   -2.43    0.00  1.0000
   1   7  -1     479     366                                                         172    2.05    0.00  1.0000
   1   7   0     409     330                                                         163   -1.81    0.00  1.0000
   1   7   1     613     376                                                         265    1.97    0.00  1.0000
   1   7   2    2245     617                                                        3084   -1.92    0.00  1.0000
   1   7   3    5276     805                                                        5892    0.96    0.01  1.0000
   1   7   4     566     440                                                         701    0.66   -0.01  1.0000
   1   7   5   10111    1133                                                       11866   -1.95    0.01  1.0000
   1   7   6    1870     710                                                        2803    2.29   -0.01  1.0000
   1   7   7    1305     556                                                         816   -1.91    0.01  1.0000
   1   7   8    5313     969                                                        6203    1.37   -0.01  1.0000
   1   7   9    2718     856                                                        3135   -0.91    0.01  1.0000
   1   7  10       4     716                                                         -37    0.46    0.00  1.0000
   1   7  10     309     614                                                         245    0.46    0.00  1.0000
   1   7  11    1264     769                                                        1256   -0.03    0.00  1.0000
   1   7  11    2003     953                                                        1992   -0.03    0.00  1.0000
  -1  -8  14     327    1003                                                         480   -0.90   -0.01  1.0000
  -1  -8  13     425    1108                                                         348    0.88    0.01  1.0000
  -1  -8  12      43     910                                                          45    0.02    0.00  1.0000
  -1  -8  11      82     786                                                          17   -1.14    0.00  1.0000
  -1  -8  10     419     863                                                         233    1.28    0.01  1.0000
  -1  -8   7    3361     880                                                        2455    1.96   -0.01  1.0000
   1   8  -7    4182     819                                                        3164    1.96    0.01  1.0000
   1   8  -6    8239    1189                                                        9520   -1.58   -0.01  1.0000
  -1  -8   6    8068    1280                                                        9337   -1.58    0.01  1.0000
   1   8  -5    2927     766                                                        3294    0.77    0.01  1.0000
   1   8  -4       0     521                                                        -317   -0.06    0.00  1.0000
   1   8  -3       2     458                                                         -74   -0.34    0.00  1.0000
   1   8  -2    6089     876                                                        5773    0.48    0.01  1.0000
   1   8  -1     208     425                                                         146   -0.57   -0.01  1.0000
   1   8   0   17819    1324                                                       18735    0.79    0.01  1.0000
   1   8   1      16     399                                                         -41   -0.94   -0.01  1.0000
   1   8   2   18722    1380                                                       18123    0.51    0.02  1.0000
   1   8   3     651     511                                                         804    0.66   -0.02  1.0000
   1   8   4    3773     685                                                        2784   -2.01    0.01  1.0000
   1   8   5    6993     855                                                        5180    2.71   -0.01  1.0000
   1   8   6    1607     502                                                         856   -2.52    0.00  1.0000
   1   8   6    1393     525                                                         702   -2.52    0.00  1.0000
   1   8   7    6953    1111                                                        8376    1.90    0.00  1.0000
   1   8   8    1539     739                                                        2023   -1.34   -0.01  1.0000
   1   8   9   20780    1730                                                       19705    0.88    0.01  1.0000
   1   8   9   21853    1887                                                       20750    0.88    0.01  1.0000
   1   8  10    1137     769                                                        1024   -0.40   -0.01  1.0000
   1   8  10     890     672                                                         790   -0.40   -0.01  1.0000
   1   8  11    8597    1482                                                        8575   -0.03    0.01  1.0000
  -1  -9  10     690     871                                                         614   -0.35   -0.01  1.0000
  -1  -9   9   10089    1551                                                        9322   -0.91    0.00  1.0000
   1   9  -8    1224     792                                                        1839    1.84    0.00  1.0000
  -1  -9   8    2003    1013                                                        2772    1.84    0.00  1.0000
   1   9  -7    7813    1264                                                        9309   -1.89    0.00  1.0000
  -1  -9   7    6840    1258                                                        8244   -1.89    0.00  1.0000
   1   9  -6   34411    2160                                                       32176    1.42    0.00  1.0000
   1   9  -5     733     559                                                         512   -1.04    0.00  1.0000
   1   9  -4   11216    1307                                                       11990    0.84   -0.01  1.0000
   1   9  -3     477     492                                                         608   -0.66    0.01  1.0000
   1   9  -2    2430     659                                                        2261    0.41   -0.01  1.0000
   1   9  -1    1774     641                                                        1809   -0.10    0.00  1.0000
   1   9   0    5784     891                                                        5939   -0.23    0.00  1.0000
   1   9   1     137     441                                                         105    0.35    0.01  1.0000
   1   9   2   14376    1307                                                       14449    0.07   -0.01  1.0000
   1   9   3    9992    1085                                                        9172   -0.98    0.00  1.0000
   1   9   4   10686    1102                                                        9172    1.77    0.00  1.0000
   1   9   5   20968    1723                                                       23348   -1.87   -0.01  1.0000
   1   9   5   23424    1792                                                       25936   -1.87   -0.01  1.0000
   1   9   6     730     583                                                         448    1.37    0.01  1.0000
   1   9   6      35     540                                                         -26    1.37    0.01  1.0000
   1   9   7   11433    1275                                                       10679   -0.84   -0.01  1.0000
   1   9   9    1409     810                                                        1565   -0.47   -0.01  1.0000
   1   9  10      69     828                                                          56    0.20    0.00  1.0000
  -1 -10  13    1311    1262                                                        1317    0.02   -0.01  1.0000
  -1 -10  12    2044    1323                                                        2217    0.43    0.01  1.0000
  -1 -10  11    3736    1297                                                        4063   -0.61    0.00  1.0000
  -1 -10  10    4284    1360                                                        4203    0.15   -0.01  1.0000
   1  10 -10    4766    1173                                                        4679    0.15    0.01  1.0000
  -1 -10   9    2240    1007                                                        2481    0.58    0.01  1.0000
   1  10  -9    3155    1000                                                        3440    0.58   -0.01  1.0000
  -1 -10   8    4412    1171                                                        3894   -0.94    0.00  1.0000
   1  10  -8    5758    1083                                                        5164   -0.94    0.00  1.0000
   1  10  -7    5582    1144                                                        6149    0.86    0.00  1.0000
   1  10  -6       9     608                                                         -72   -0.71    0.01  1.0000
   1  10  -5    9878    1298                                                        9300    0.69   -0.01  1.0000
   1  10  -4   11892    1414                                                       12501   -0.64    0.01  1.0000
   1  10  -3     331     548                                                         405    0.45    0.00  1.0000
   1  10  -2   29986    2020                                                       29712   -0.18   -0.01  1.0000
   1  10  -1    1498     634                                                        1476   -0.07    0.02  1.0000
   1  10   0    6505     984                                                        6310    0.29   -0.01  1.0000
   1  10   1   14181    1386                                                       14481   -0.29    0.00  1.0000
   1  10   2    7856    1091                                                        7910   -0.07    0.00  1.0000
   1  10   3   18678    1625                                                       19424    0.63    0.01  1.0000
   1  10   4   15123    1464                                                       14206   -0.88   -0.01  1.0000
   1  10   5     231     592                                                         295    0.58    0.01  1.0000
   1  10   6    2533     873                                                        2573   -0.09   -0.01  1.0000
   1  10   9    1889     945                                                        1994    0.28    0.00  1.0000
   1  11 -12    2674    1223                                                        2509   -0.38    0.00  1.0000
   1  11 -11    1254    1042                                                        1438    0.59    0.01  1.0000
  -1 -11  11     226     950                                                         307    0.59   -0.01  1.0000
   1  11 -10     457     816                                                         549   -0.48   -0.01  1.0000
  -1 -11  10     498     930                                                         594   -0.48    0.01  1.0000
   1  11  -9    1592     934                                                        1529    0.19    0.01  1.0000
   1  11  -8     368     743                                                         363    0.03    0.00  1.0000
   1  11  -7     929     773                                                         971   -0.15    0.00  1.0000
   1  11  -6   10326    1478                                                       10580    0.29   -0.01  1.0000
   1  11  -5   24696    2043                                                       24198   -0.37    0.00  1.0000
   1  11  -4    4908    1048                                                        4749    0.27    0.00  1.0000
   1  11  -3   21949    1867                                                       21979   -0.02   -0.02  1.0000
   1  11  -2     402     579                                                         432   -0.18    0.02  1.0000
   1  11  -1   10093    1279                                                       10322    0.27   -0.02  1.0000
   1  11   0    4741     912                                                        4599   -0.24    0.01  1.0000
   1  11   3    8892    1286                                                        9146   -0.31    0.00  1.0000
   1  11   4    2003     824                                                        1951    0.13    0.00  1.0000
   1  11   5    4252    1013                                                        4411    0.28    0.00  1.0000
   1  11   6    8425    1346                                                        8027   -0.51    0.00  1.0000
   1  11   8    5175    1258                                                        5127    0.08    0.00  1.0000
   1  12 -11       4     862                                                        -200   -0.48   -0.01  1.0000
   1  12 -10    1283    1057                                                        1437    0.49    0.00  1.0000
   1  12  -9    4623    1268                                                        4461   -0.28    0.00  1.0000
   1  12  -8       0     754                                                        -175    0.03   -0.01  1.0000
   1  12  -7    5517    1215                                                        5399    0.19    0.00  1.0000
   1  12  -6    6572    1297                                                        6817   -0.35    0.00  1.0000
   1  12  -5    3637    1043                                                        3821    0.35    0.00  1.0000
   1  12   1    1044     821                                                        1088    0.16   -0.01  1.0000
   1  12   2    7401    1270                                                        7247   -0.21    0.01  1.0000
   1  12   3     840     787                                                         853    0.05   -0.01  1.0000
   1  12   4    5222    1133                                                        5060    0.26    0.01  1.0000
   1  12   5    4677    1146                                                        4975   -0.50   -0.01  1.0000
   1  13  -9     278     811                                                         272   -0.04   -0.01  1.0000
   1  13  -8     708     787                                                         749    0.18    0.00  1.0000
   1  13  -7     319     766                                                         277   -0.28    0.00  1.0000
   1  13  -2    1471     901                                                        1346   -0.39    0.00  1.0000
   1  13  -1     943     782                                                         996    0.20    0.01  1.0000
   1  13   0     430     783                                                         410    0.12   -0.01  1.0000
   1  13   1     518     811                                                         571   -0.27    0.01  1.0000
  -2  14   3    1153     842                                                        1165    0.04   -0.01  1.0000
  -2  14   2    1394     918                                                        1385    0.03    0.01  1.0000
  -2  14   1     167     809                                                         184   -0.15    0.00  1.0000
  -2  14   0    1397     936                                                        1449    0.16    0.00  1.0000
  -2  14  -1     162     672                                                         158   -0.04    0.00  1.0000
  -2  14  -2     213     783                                                         221   -0.06    0.00  1.0000
  -2  14  -3     280     815                                                         282   -0.01    0.01  1.0000
  -2  14  -4       1     844                                                        -209    0.19   -0.01  1.0000
  -2  14  -5     668     786                                                         765   -0.42    0.01  1.0000
  -2  14  -6      10     775                                                        -222    0.73   -0.01  1.0000
  -2  14  -7     721     695                                                         504   -1.03    0.01  1.0000
  -2  14  -8     689     757                                                         957    1.09   -0.01  1.0000
  -2  13   6    1659     847                                                        1779   -0.34    0.00  1.0000
  -2  13   5      61     650                                                          36    0.43    0.01  1.0000
  -2  13   4    1182     789                                                        1284   -0.34    0.00  1.0000
  -2  13   3       1     730                                                           0    0.19    0.00  1.0000
  -2  13   2    2796     990                                                        2692   -0.23    0.00  1.0000
  -2  13   1     602     815                                                         697    0.44   -0.01  1.0000
  -2  13   0     502     786                                                         604   -0.51    0.01  1.0000
  -2  13  -1    3456     978                                                        3329    0.25   -0.01  1.0000
  -2  13  -2       0     733                                                        -124    0.07    0.01  1.0000
  -2  13  -3    4164    1029                                                        4099   -0.12   -0.01  1.0000
  -2  13  -4     732     746                                                         688   -0.20    0.01  1.0000
  -2  13  -5       9     723                                                        -397    0.69    0.00  1.0000
  -2  13  -6    2835     970                                                        3364   -1.11    0.00  1.0000
   2 -13   7      29     872                                                         -70    1.25    0.00  1.0000
  -2  13  -7    3110     882                                                        2541    1.25    0.00  1.0000
  -2  13  -8     529     731                                                         758   -1.06    0.00  1.0000
  -2  12   6    3138     932                                                        3556    0.84    0.00  1.0000
  -2  12   5     933     644                                                         752   -0.75    0.00  1.0000
  -2  12   4     539     694                                                         601    0.31   -0.01  1.0000
  -2  12   3   21088    1856                                                       20988    0.08    0.01  1.0000
  -2  12   2     706     721                                                         705    0.01   -0.01  1.0000
  -2  12   1    7520    1219                                                        7279   -0.33    0.01  1.0000
  -2  12   0    5368    1092                                                        5544    0.28   -0.01  1.0000
  -2  12  -1    2189     833                                                        2294    0.26    0.01  1.0000
  -2  12  -2   10922    1406                                                       11544   -0.68    0.00  1.0000
  -2  12  -3     707     716                                                         611    0.44    0.00  1.0000
  -2  12  -4       2     624                                                        -101    0.34    0.01  1.0000
   2 -12   5     833     756                                                         587   -1.08    0.01  1.0000
  -2  12  -5    3118     791                                                        2622   -1.08   -0.01  1.0000
  -2  12  -6    7542    1234                                                        8589    1.36    0.01  1.0000
  -2  12  -7     235     622                                                         107   -1.16   -0.01  1.0000
  -2  12  -8   10763    1281                                                       10068    0.79    0.01  1.0000
   2 -12   8    4831    1279                                                        4369    0.79   -0.01  1.0000
   2 -12   9      31     978                                                          65   -0.59    0.01  1.0000
   2 -12  10       8     912                                                        -340    0.66   -0.01  1.0000
   2 -12  11      10    1016                                                         -29   -0.74    0.00  1.0000
   2 -12  12      70    1065                                                         112    0.53    0.01  1.0000
  -2  11  10     813     866                                                         691   -0.52    0.00  1.0000
  -2  11   9   11065    1507                                                       11545    0.53   -0.01  1.0000
  -2  11   7   17530    1595                                                       16644    0.79   -0.01  1.0000
  -2  11   6      78     578                                                         133   -0.82    0.01  1.0000
  -2  11   5     844     675                                                         918    0.35   -0.01  1.0000
  -2  11   4   22322    1822                                                       22823    0.39    0.01  1.0000
  -2  11   3    1323     672                                                        1115   -0.69    0.00  1.0000
  -2  11   2    6992    1106                                                        6743    0.35    0.00  1.0000
  -2  11   1   13342    1436                                                       13398   -0.06    0.00  1.0000
  -2  11   0    2661     822                                                        2462    0.45    0.00  1.0000
  -2  11  -1    7623    1062                                                        6775   -1.16    0.00  1.0000
  -2  11  -2   12801    1432                                                       13976    1.18   -0.01  1.0000
  -2  11  -3    2746     814                                                        2655   -0.20    0.01  1.0000
  -2  11  -4    4802     975                                                        5437   -1.04   -0.01  1.0000
   2 -11   5     622     671                                                         317    1.68   -0.01  1.0000
  -2  11  -5    6412     958                                                        5324    1.68    0.01  1.0000
  -2  11  -6    2404     690                                                        1810   -1.51    0.00  1.0000
   2 -11   6      43     713                                                         -15   -1.51    0.00  1.0000
  -2  11  -7   12695    1359                                                       13637    0.96    0.00  1.0000
  -2  11  -8    2051     667                                                        1882   -0.44    0.00  1.0000
  -2  10  11    4942    1192                                                        5061   -0.20    0.01  1.0000
  -2  10  10   12508    1560                                                       12412    0.10   -0.01  1.0000
  -2  10   9    4864    1072                                                        4836   -0.05    0.01  1.0000
  -2  10   8   20521    1784                                                       20742    0.18    0.00  1.0000
  -2  10   7     608     562                                                         681   -0.34    0.00  1.0000
  -2  10   7     492     618                                                         558   -0.34    0.00  1.0000
  -2  10   6    7368    1053                                                        7268    0.14    0.00  1.0000
  -2  10   6    8446    1087                                                        8339    0.14    0.00  1.0000
  -2  10   5    7373     973                                                        7037    0.46    0.00  1.0000
  -2  10   5    6803     994                                                        6480    0.46    0.00  1.0000
  -2  10   4    1196     649                                                        1469   -0.87    0.00  1.0000
  -2  10   3      57     550                                                          65    0.59   -0.01  1.0000
  -2  10   2   14860    1412                                                       14821   -0.04    0.01  1.0000
  -2  10   1   18146    1552                                                       18315    0.15   -0.01  1.0000
  -2  10   0   23035    1755                                                       24364   -1.00    0.01  1.0000
  -2  10  -1   34823    1974                                                       32387    1.55   -0.01  1.0000
   2 -10   2     166     445                                                          84   -0.86   -0.01  1.0000
  -2  10  -2    2429     655                                                        2077   -0.86    0.01  1.0000
  -2  10  -3    8232    1046                                                        7756   -0.63    0.00  1.0000
   2 -10   3       7     538                                                         -89   -0.63    0.00  1.0000
  -2  10  -4    1601     665                                                        2241    1.71   -0.01  1.0000
  -2  10  -5    3802     774                                                        4788   -1.76    0.01  1.0000
  -2  10  -5    4173     877                                                        5203   -1.76    0.01  1.0000
  -2  10  -6    6155     879                                                        5421    1.13   -0.01  1.0000
  -2  10  -7    1914     650                                                        2063   -0.39    0.00  1.0000
  -2  10  -8     859     524                                                         804   -0.22    0.00  1.0000
  -2   9  12    5853    1266                                                        5985    0.20    0.01  1.0000
  -2   9  11     121     666                                                         168   -0.46   -0.01  1.0000
  -2   9  10    1822     813                                                        1588    0.67    0.01  1.0000
  -2   9   9     223     616                                                         148   -0.64    0.00  1.0000
  -2   9   8     820     610                                                         713    0.45   -0.01  1.0000
  -2   9   7     197     499                                                         230   -0.37    0.01  1.0000
  -2   9   7     167     546                                                         198   -0.37    0.01  1.0000
  -2   9   6    6590     967                                                        6962    0.53   -0.01  1.0000
  -2   9   6    5500     890                                                        5840    0.53   -0.01  1.0000
  -2   9   5    6465     862                                                        6087   -0.56    0.01  1.0000
  -2   9   5    5622     891                                                        5270   -0.56    0.01  1.0000
  -2   9   4    4722     842                                                        4713    0.02   -0.01  1.0000
  -2   9   4    5176     773                                                        5166    0.02   -0.01  1.0000
  -2   9   3   24293    1682                                                       23175    0.84    0.01  1.0000
  -2   9   3   27646    1474                                                       26453    0.84    0.01  1.0000
  -2   9   2     101     330                                                         215   -1.08    0.00  1.0000
  -2   9   2     235     472                                                         397   -1.08    0.00  1.0000
  -2   9   1   28324    1780                                                       28598    0.19    0.00  1.0000
  -2   9   0      19     445                                                          -8    1.01    0.00  1.0000
  -2   9  -1   23198    1650                                                       24874   -1.26    0.00  1.0000
  -2   9  -1   20892    1201                                                       22484   -1.26    0.00  1.0000
  -2   9  -2    1351     412                                                        1249    0.33    0.01  1.0000
   2  -9   2     100     407                                                          73    0.33   -0.01  1.0000
  -2   9  -2    1226     527                                                        1129    0.33    0.01  1.0000
  -2   9  -3    1211     510                                                        1001    0.73   -0.02  1.0000
  -2   9  -3    1507     432                                                        1272    0.73   -0.02  1.0000
  -2   9  -4    2028     549                                                        2434   -1.00    0.02  1.0000
  -2   9  -4    1923     635                                                        2318   -1.00    0.02  1.0000
   2  -9   5       6     637                                                         -93    0.56    0.01  1.0000
  -2   9  -5    3644     732                                                        3939    0.56   -0.01  1.0000
  -2   9  -6   17783    1360                                                       17808    0.02    0.00  1.0000
   2  -9   6     230     718                                                         233    0.02    0.00  1.0000
   2  -9   7       5     801                                                        -150   -0.53    0.00  1.0000
  -2   9  -7    7400     947                                                        7795   -0.53    0.00  1.0000
  -2   9  -8   22201    1417                                                       20896    1.03    0.00  1.0000
   2  -9  11       0     974                                                         -82   -0.08   -0.01  1.0000
   2  -9  12      14    1102                                                         -91   -0.86    0.01  1.0000
   2  -9  14     840    1308                                                         975   -0.55    0.00  1.0000
  -2   8  12     503     754                                                         632   -0.63    0.00  1.0000
  -2   8  11    1293     768                                                        1023    0.96    0.00  1.0000
  -2   8  10      21     622                                                         -57   -1.07    0.01  1.0000
  -2   8   9     502     658                                                         685    0.94   -0.01  1.0000
  -2   8   8    2871     742                                                        2509   -0.81    0.01  1.0000
  -2   8   7    7323     968                                                        6792    0.74   -0.01  1.0000
  -2   8   7    8016     913                                                        7460    0.74   -0.01  1.0000
  -2   8   6     114     410                                                         150   -0.39    0.00  1.0000
  -2   8   6       3     416                                                         -22   -0.39    0.00  1.0000
  -2   8   5   22508    1454                                                       21726   -0.61    0.00  1.0000
  -2   8   5   22406    1439                                                       21625   -0.61    0.00  1.0000
  -2   8   4     643     373                                                         296    1.94    0.00  1.0000
  -2   8   4     322     379                                                          95    1.94    0.00  1.0000
  -2   8   3    1723     534                                                        2772   -2.61    0.01  1.0000
  -2   8   3    1791     629                                                        2858   -2.61    0.01  1.0000
  -2   8   2     396     483                                                         766    1.87   -0.01  1.0000
  -2   8   2     565     304                                                         997    1.87   -0.01  1.0000
  -2   8   2     594     357                                                        1035    1.87   -0.01  1.0000
  -2   8   1    2862     616                                                        2769   -0.20    0.01  1.0000
  -2   8   1    2878     414                                                        2784   -0.20    0.01  1.0000
  -2   8   0     543     396                                                         375   -1.09    0.00  1.0000
  -2   8   0     464     226                                                         309   -1.09    0.00  1.0000
  -2   8  -1    4799     506                                                        4022    1.36    0.00  1.0000
  -2   8  -1    4885     735                                                        4101    1.36    0.00  1.0000
  -2   8  -2    7749     671                                                        6923   -1.13   -0.01  1.0000
  -2   8  -2    8309     895                                                        7452   -1.13   -0.01  1.0000
  -2   8  -3     176     421                                                         324    1.16    0.01  1.0000
   2  -8   3      16     460                                                          74    1.16   -0.01  1.0000
  -2   8  -3      25     244                                                          -6    1.16    0.01  1.0000
  -2   8  -4   10245    1056                                                       11541   -1.44   -0.01  1.0000
   2  -8   5      41     620                                                         -51    1.49    0.00  1.0000
  -2   8  -5     862     393                                                         526    1.49    0.00  1.0000
  -2   8  -6     931     482                                                        1282   -1.24    0.01  1.0000
  -2   8  -7    3387     647                                                        3973    1.12   -0.01  1.0000
  -2   8  -8    1523     513                                                        1985   -1.29    0.01  1.0000
   2  -8  10      12     901                                                         -98   -0.79    0.00  1.0000
   2  -8  11     194    1035                                                         208   -0.12    0.00  1.0000
   2  -8  14       0    1229                                                        -201   -0.01    0.00  1.0000
  -2   7  13    3218    1087                                                        3079   -0.29    0.00  1.0000
  -2   7  12      35     762                                                          12    0.57    0.00  1.0000
  -2   7  11    3254     967                                                        3626   -0.74    0.01  1.0000
  -2   7  10    4358     963                                                        4775    0.72   -0.01  1.0000
  -2   7   9     423     550                                                         333   -0.74    0.00  1.0000
  -2   7   8    7153     992                                                        6527    0.88    0.00  1.0000
  -2   7   7    1755     539                                                        2021   -0.72   -0.01  1.0000
  -2   7   7    1928     639                                                        2206   -0.72   -0.01  1.0000
  -2   7   6    6837     804                                                        6640   -0.28    0.01  1.0000
  -2   7   6    6558     872                                                        6365   -0.28    0.01  1.0000
  -2   7   6    6957     698                                                        6758   -0.28    0.01  1.0000
  -2   7   5    7933     934                                                        9439    1.89   -0.01  1.0000
  -2   7   5    8368     985                                                        9914    1.89   -0.01  1.0000
  -2   7   5    8613     778                                                       10181    1.89   -0.01  1.0000
  -2   7   4    7032     707                                                        9299   -2.95    0.01  1.0000
  -2   7   4    7361     905                                                        9678   -2.95    0.01  1.0000
  -2   7   4    7757     938                                                       10131   -2.95    0.01  1.0000
  -2   7   3   16175    1082                                                       13601    2.46   -0.01  1.0000
  -2   7   3   16015     774                                                       13455    2.46   -0.01  1.0000
  -2   7   3   16593     977                                                       13985    2.46   -0.01  1.0000
  -2   7   2    4828     555                                                        4428   -0.69    0.01  1.0000
  -2   7   2    4177     415                                                        3805   -0.69    0.01  1.0000
  -2   7   2    4946     694                                                        4541   -0.69    0.01  1.0000
  -2   7   1   35514    1216                                                       33732   -1.11    0.00  1.0000
  -2   7   1   35798    1116                                                       34008   -1.11    0.00  1.0000
  -2   7   1   35411    1674                                                       33632   -1.11    0.00  1.0000
  -2   7   0      84     317                                                         195    2.15   -0.01  1.0000
  -2   7   0      54     184                                                         128    2.15   -0.01  1.0000
  -2   7  -1    7912     951                                                       10203   -2.80    0.01  1.0000
  -2   7  -1    7846     670                                                       10128   -2.80    0.01  1.0000
  -2   7  -2   17158    1009                                                       21539    3.66    0.00  1.0000
  -2   7  -2   17204    1305                                                       21590    3.66    0.00  1.0000
  -2   7  -3   35365    1828                                                       42888   -4.42    0.00  1.0000
  -2   7  -4   22277    1161                                                       17180    4.23   -0.01  1.0000
  -2   7  -5   31918    1421                                                       27496   -2.98    0.01  1.0000
   2  -7   5     263     700                                                          11   -2.98   -0.01  1.0000
   2  -7   6     132    1024                                                         333    1.57    0.01  1.0000
  -2   7  -6   37701    1681                                                       40367    1.57   -0.01  1.0000
  -2   7  -7    1068     410                                                        1303   -0.80    0.00  1.0000
   2  -7   7   24161    3265                                                       25240   -0.80    0.00  1.0000
  -2   7  -8   26085    1266                                                       25177    0.66    0.00  1.0000
   2  -7   8     971     978                                                         802    0.66    0.00  1.0000
   2  -7   9       8    1226                                                       -1393   -0.66    0.01  1.0000
   2  -7  13      76    1068                                                          55   -0.30    0.00  1.0000
  -2   6  14    3137    1012                                                        3200    0.13    0.00  1.0000
  -2   6  13     971     843                                                         946   -0.09    0.00  1.0000
  -2   6  12    8430    1351                                                        8434    0.00    0.00  1.0000
  -2   6  11    5966    1102                                                        5942    0.04    0.00  1.0000
  -2   6  10   17304    1589                                                       17064   -0.21   -0.01  1.0000
  -2   6   9   17634    1569                                                       18530    0.78    0.01  1.0000
  -2   6   8   21200    1630                                                       22934   -1.36   -0.01  1.0000
  -2   6   7   39823    1938                                                       37878    1.15    0.01  1.0000
  -2   6   7   36682    1606                                                       34816    1.15    0.01  1.0000
  -2   6   6    3223     514                                                        3203    0.04    0.00  1.0000
  -2   6   6    3159     628                                                        3139    0.04    0.00  1.0000
  -2   6   6    2769     531                                                        2750    0.04    0.00  1.0000
  -2   6   5   16813     899                                                       15527   -1.17    0.00  1.0000
  -2   6   5   18990    1138                                                       17622   -1.17    0.00  1.0000
  -2   6   4    3680     411                                                        3212    0.93    0.00  1.0000
  -2   6   4    4495     589                                                        3976    0.93    0.00  1.0000
  -2   6   4    4719     587                                                        4187    0.93    0.00  1.0000
  -2   6   3    9328     604                                                        9954    0.74   -0.01  1.0000
  -2   6   3    9826     806                                                       10469    0.74   -0.01  1.0000
  -2   6   3    9820     875                                                       10463    0.74   -0.01  1.0000
  -2   6   2     112     290                                                         -31   -2.45    0.01  1.0000
  -2   6   2     189     216                                                          20   -2.45    0.01  1.0000
  -2   6   2     125     142                                                           1   -2.45    0.01  1.0000
  -2   6   1  164726    2409                                                      154131    3.08   -0.02  1.0000
  -2   6   1  162719    2032                                                      152190    3.08   -0.02  1.0000
  -2   6   1  161775    3201                                                      151277    3.08   -0.02  1.0000
  -2   6   0   11994     661                                                       15142   -3.18    0.02  1.0000
  -2   6   0   10656     990                                                       13634   -3.18    0.02  1.0000
  -2   6   0   11365     655                                                       14435   -3.18    0.02  1.0000
  -2   6  -1   59997    1100                                                       68763    4.02   -0.01  1.0000
  -2   6  -1   63885    1559                                                       72921    4.02   -0.01  1.0000
  -2   6  -1   60091    2131                                                       68864    4.02   -0.01  1.0000
  -2   6  -2  219445    3565                                                      197595   -5.56    0.01  1.0000
   2  -6   3     731     772                                                        -198    6.27    0.01  1.0000
  -2   6  -3    5563     466                                                        2277    6.27   -0.01  1.0000
  -2   6  -4   46231    1873                                                       56064   -5.07    0.00  1.0000
  -2   6  -5   28548    1210                                                       24818    2.65    0.00  1.0000
   2  -6   5   27331     758                                                       23684    2.65    0.00  1.0000
   2  -6   6    1241     265                                                        1424   -0.59    0.01  1.0000
  -2   6  -6    1178     363                                                        1357   -0.59   -0.01  1.0000
  -2   6  -7    3435     470                                                        3257   -0.36    0.01  1.0000
   2  -6   7       2    1237                                                        -522   -0.36   -0.01  1.0000
  -2   6  -8   17612     973                                                       18049    0.38   -0.01  1.0000
   2  -6  11     146    1383                                                          40    1.34   -0.01  1.0000
   2  -6  15      48    1212                                                          76   -0.42    0.01  1.0000
  -2   5  14   12309    1650                                                       11941   -0.39    0.01  1.0000
  -2   5  13   13735    1681                                                       14195    0.46   -0.01  1.0000
  -2   5  12    9904    1403                                                       10301   -0.46    0.00  1.0000
  -2   5  11   12846    1442                                                       12610    0.25   -0.01  1.0000
  -2   5  10     953     617                                                         817    0.53    0.01  1.0000
  -2   5   9    6327     891                                                        5168   -1.78   -0.01  1.0000
  -2   5   8   26806    1813                                                       30729    2.68    0.00  1.0000
  -2   5   7   47782    1669                                                       43146   -2.53    0.01  1.0000
  -2   5   7   49478    2035                                                       44758   -2.53    0.01  1.0000
  -2   5   6    4742     544                                                        3761    1.76   -0.02  1.0000
  -2   5   6    4250     595                                                        3324    1.76   -0.02  1.0000
  -2   5   5   70040    2289                                                       74100   -1.76    0.02  1.0000
  -2   5   5   71260    2108                                                       75355   -1.76    0.02  1.0000
  -2   5   4  157396    2987                                                      146911    3.13   -0.02  1.0000
  -2   5   4  157750    2929                                                      147253    3.13   -0.02  1.0000
  -2   5   4  165273    2379                                                      154524    3.13   -0.02  1.0000
  -2   5   3   31092    1134                                                       24602   -4.55    0.02  1.0000
  -2   5   3   31339    1202                                                       24822   -4.55    0.02  1.0000
  -2   5   3   29947     836                                                       23584   -4.55    0.02  1.0000
  -2   5   2  218104    2241                                                      235118    4.16   -0.01  1.0000
  -2   5   2  209841    3534                                                      226536    4.16   -0.01  1.0000
  -2   5   1    6729     428                                                        5389   -2.00    0.01  1.0000
  -2   5   1    7076     607                                                        5700   -2.00    0.01  1.0000
  -2   5   1    6862     322                                                        5508   -2.00    0.01  1.0000
  -2   5   0   70978    1189                                                       70119    0.38    0.00  1.0000
  -2   5   0   74369    1150                                                       73490    0.38    0.00  1.0000
  -2   5   0   75422    2017                                                       74536    0.38    0.00  1.0000
  -2   5  -1  131242    2680                                                      134682   -1.09    0.00  1.0000
  -2   5  -2    3041     540                                                        4743    3.19    0.00  1.0000
  -2   5  -3   49503    1474                                                       41961   -4.10    0.00  1.0000
   2  -5   4   55870     971                                                       61568    2.73   -0.01  1.0000
  -2   5  -4   57446    1776                                                       63223    2.73    0.01  1.0000
  -2   5  -5   66680    1762                                                       65879   -0.36   -0.01  1.0000
   2  -5   5   72028    1311                                                       71197   -0.36    0.01  1.0000
  -2   5  -6   25075    1098                                                       26846   -1.28    0.01  1.0000
   2  -5   6   25525     992                                                       27315   -1.28   -0.01  1.0000
   2  -5   7   74120    1807                                                       70358    1.63    0.00  1.0000
  -2   5  -7   71318    1706                                                       67630    1.63    0.00  1.0000
   2  -5   8    1463     343                                                        1160   -0.98    0.00  1.0000
   2  -5   9   27972    1368                                                       27659   -0.22    0.00  1.0000
   2  -5  13    5108    1926                                                        5489    0.61   -0.02  1.0000
   2  -5  16     425    1233                                                         363   -0.36    0.00  1.0000
  -2   4  15    9572    1573                                                        9746   -0.21    0.01  1.0000
  -2   4  14     511     801                                                         572    0.35    0.00  1.0000
  -2   4  13     664     644                                                         565   -0.47    0.00  1.0000
  -2   4  12    3021     928                                                        3210    0.39    0.00  1.0000
  -2   4  11   24040    1872                                                       24325    0.21    0.00  1.0000
  -2   4  10    4513     841                                                        3703   -1.49    0.00  1.0000
  -2   4   9   76262    2781                                                       69421    2.95   -0.01  1.0000
  -2   4   8  111012    3474                                                      121960   -3.73    0.01  1.0000
  -2   4   8  108090    2558                                                      118896   -3.73    0.01  1.0000
  -2   4   7   97255    3078                                                      107087    3.58   -0.02  1.0000
  -2   4   7   99352    2454                                                      109287    3.58   -0.02  1.0000
  -2   4   6  258886    4321                                                      244420   -3.35    0.02  1.0000
  -2   4   6  256305    3608                                                      241913   -3.35    0.02  1.0000
  -2   4   5    2208     589                                                        4166    4.08   -0.02  1.0000
  -2   4   5    2185     509                                                        4134    4.08   -0.02  1.0000
  -2   4   4    9340     918                                                       14055   -5.16    0.02  1.0000
  -2   4   4    8977     845                                                       13608   -5.16    0.02  1.0000
  -2   4   3   38741    1222                                                       31813    4.29   -0.01  1.0000
  -2   4   3   38040    1232                                                       31178    4.29   -0.01  1.0000
  -2   4   2     223      99                                                         229   -0.04   -0.01  1.0000
  -2   4   2     186     214                                                         191   -0.04   -0.01  1.0000
  -2   4   2      38     155                                                          40   -0.04   -0.01  1.0000
  -2   4   1    2136     374                                                        4964   -5.63    0.01  1.0000
  -2   4   1    1979     497                                                        4723   -5.63    0.01  1.0000
  -2   4   0   66582    1152                                                       87291    8.70   -0.01  1.0000
  -2   4   0   65454    1965                                                       85999    8.70   -0.01  1.0000
  -2   4  -1  438258    4156                                                      397901   -7.25    0.01  1.0000
  -2   4  -2  358593    3768                                                      340954    3.46    0.00  1.0000
   2  -4   3   93518    1002                                                       96121   -0.99   -0.01  1.0000
  -2   4  -3   96723    1989                                                       99366   -0.99    0.01  1.0000
   2  -4   4   30294     819                                                       31914    1.07    0.01  1.0000
  -2   4  -4   26382    1046                                                       27895    1.07   -0.01  1.0000
  -2   4  -5  133996    2156                                                      127315   -2.15    0.00  1.0000
   2  -4   5  133925    2014                                                      127244   -2.15    0.00  1.0000
  -2   4  -6   62321    1528                                                       67698    2.45    0.01  1.0000
   2  -4   6   64382    1704                                                       69844    2.45   -0.01  1.0000
   2  -4   7   16857     996                                                       18694   -1.61    0.01  1.0000
  -2   4  -7   15679     751                                                       17455   -1.61   -0.01  1.0000
   2  -4   8     878     349                                                         949    0.28   -0.01  1.0000
   2  -4   9    5193     640                                                        4672    0.86    0.01  1.0000
   2  -4  10      88     363                                                          18   -1.20    0.00  1.0000
   2  -4  11   19906    1433                                                       20427    0.43    0.00  1.0000
   2  -4  12     407    1627                                                         593    0.98   -0.01  1.0000
   2  -4  12    7364    1015                                                        8099    0.98   -0.01  1.0000
   2  -4  14     597    1858                                                         308    1.62    0.00  1.0000
  -2   3  15    4343    1098                                                        4330   -0.02    0.01  1.0000
  -2   3  14    2230     920                                                        2157   -0.18   -0.01  1.0000
  -2   3  13   25667    2016                                                       25110    0.41    0.01  1.0000
  -2   3  12   34820    2274                                                       35298   -0.30   -0.01  1.0000
  -2   3  11    3988     883                                                        3790   -0.38    0.01  1.0000
  -2   3  10   75915    3056                                                       79410    1.46   -0.01  1.0000
  -2   3   9    1271     492                                                         651   -2.39    0.01  1.0000
  -2   3   8   41810    1896                                                       37248    2.67   -0.01  1.0000
  -2   3   8   39016    1307                                                       34614    2.67   -0.01  1.0000
  -2   3   7   18978    1025                                                       22055   -2.49    0.01  1.0000
  -2   3   7   18580    1382                                                       21626   -2.49    0.01  1.0000
  -2   3   6    9938     982                                                       12361    2.67   -0.01  1.0000
  -2   3   6   10184     611                                                       12636    2.67   -0.01  1.0000
  -2   3   6    9583     763                                                       11965    2.67   -0.01  1.0000
  -2   3   5   11296     987                                                       14616   -3.40    0.01  1.0000
  -2   3   5   12246     842                                                       15693   -3.40    0.01  1.0000
  -2   3   4   66577    1963                                                       73425    3.01    0.00  1.0000
  -2   3   4   66073    1754                                                       72896    3.01    0.00  1.0000
  -2   3   3  174289    2690                                                      178192    1.08   -0.01  1.0000
  -2   3   3  173330    2734                                                      177222    1.08   -0.01  1.0000
  -2   3   2    1754     469                                                        6375   -9.03    0.02  1.0000
  -2   3   2    1890     529                                                        6634   -9.03    0.02  1.0000
  -2   3   1  201686    1772                                                      142056   16.80   -0.01  1.0000
  -2   3   1  200677    2312                                                      141209   16.80   -0.01  1.0000
  -2   3   0   50302    1864                                                       94336  -19.23    0.01  1.0000
  -2   3   0   51532    1153                                                       96018  -19.23    0.01  1.0000
  -2   3  -1  576867    4894                                                      680179   15.14    0.00  1.0000
   2  -3   2    1335     453                                                        -214   -8.48    0.00  1.0000
  -2   3  -2   90584    1973                                                      113914   -8.48    0.00  1.0000
  -2   3  -3   77601    1492                                                       68491    3.92    0.00  1.0000
  -2   3  -4    2246     338                                                        3390   -2.52    0.00  1.0000
  -2   3  -5       6     137                                                         117    2.11    0.01  1.0000
   2  -3   5       2     182                                                          85    2.11   -0.01  1.0000
  -2   3  -6    3497     319                                                        3079   -0.85   -0.01  1.0000
   2  -3   6    4442     481                                                        3967   -0.85    0.01  1.0000
   2  -3   7   10999     787                                                       10144   -0.97   -0.01  1.0000
  -2   3  -7    9831     457                                                        9025   -0.97    0.01  1.0000
   2  -3   8   71121    2244                                                       75902    2.05    0.00  1.0000
   2  -3   8      58    1616                                                         270    2.05    0.00  1.0000
   2  -3   9      57    1992                                                       -1662   -1.75    0.00  1.0000
   2  -3   9     346     375                                                         682   -1.75    0.00  1.0000
   2  -3  10   57446    2239                                                       56619    0.40    0.00  1.0000
   2  -3  11     877     491                                                         610    1.17    0.00  1.0000
   2  -3  12   29691    1776                                                       26615   -2.14    0.00  1.0000
   2  -3  13       2    1570                                                          58    2.03    0.01  1.0000
   2  -3  13    2682     834                                                        3658    2.03    0.01  1.0000
   2  -3  14    2905     868                                                        3418   -1.07   -0.01  1.0000
   2  -3  15      34    1194                                                          33    0.03    0.00  1.0000
   2  -3  15     656     689                                                         648    0.03    0.00  1.0000
  -2   2  15    2031     882                                                        2061    0.08   -0.02  1.0000
  -2   2  14   20184    1949                                                       20677    0.40    0.01  1.0000
  -2   2  13    1054     788                                                        1312   -0.88    0.00  1.0000
  -2   2  12    2359     748                                                        1960    1.03    0.00  1.0000
  -2   2  11    3815     804                                                        3387   -0.83    0.00  1.0000
  -2   2  10    3530     765                                                        3279    0.50    0.00  1.0000
  -2   2   9   23903    1578                                                       24231   -0.25    0.01  1.0000
  -2   2   8   12393    1106                                                       12489    0.10   -0.01  1.0000
  -2   2   8   11821     729                                                       11915    0.10   -0.01  1.0000
  -2   2   7   24066    1003                                                       24391    0.24    0.01  1.0000
  -2   2   7   23275    1393                                                       23595    0.24    0.01  1.0000
  -2   2   6    6509     568                                                        7326   -1.14    0.00  1.0000
  -2   2   6    6881     777                                                        7720   -1.14    0.00  1.0000
  -2   2   5  170548    3093                                                      163766    1.93    0.00  1.0000
  -2   2   5  174445    2538                                                      167585    1.93    0.00  1.0000
  -2   2   4    2913     403                                                        2789   -0.27    0.00  1.0000
  -2   2   4    2988     363                                                        2862   -0.27    0.00  1.0000
  -2   2   3   43945    1088                                                       33914   -5.96    0.00  1.0000
  -2   2   3   41091    1113                                                       31413   -5.96    0.00  1.0000
  -2   2   2   28554     610                                                       10653   15.27    0.00  1.0000
  -2   2   2   25737     522                                                        8960   15.27    0.00  1.0000
  -2   2   1    1048     351                                                        5234  -22.11    0.00  1.0000
  -2   2   1    1043     428                                                        5252  -22.11    0.00  1.0000
   2  -2   0  120702    1412                                                      193807   21.54   -0.01  1.0000
  -2   2   0  118739    2402                                                      191318   21.54    0.01  1.0000
  -2   2   0  122111    1820                                                      195592   21.54    0.01  1.0000
   2  -2   1   84999     955                                                       52811  -14.33    0.01  1.0000
  -2   2  -1   82560    1225                                                       50890  -14.33   -0.01  1.0000
  -2   2  -2    8907     377                                                        4655    6.12    0.01  1.0000
   2  -2   2    9069     363                                                        4774    6.12   -0.01  1.0000
  -2   2  -3   30706     939                                                       32992   -1.49   -0.01  1.0000
   2  -2   3   30771    1073                                                       33059   -1.49    0.01  1.0000
  -2   2  -4    6964     431                                                        7025    0.08    0.01  1.0000
   2  -2   4    6821     593                                                        6879    0.08   -0.01  1.0000
  -2   2  -5   76394    1281                                                       73781    1.11   -0.01  1.0000
  -2   2  -6  198098    2027                                                      211144   -3.35    0.00  1.0000
   2  -2   7    8001     908                                                       12404    5.09   -0.01  1.0000
   2  -2   8   22086    1138                                                       16668   -4.56    0.00  1.0000
   2  -2   9    2886     669                                                        3925    2.07    0.00  1.0000
   2  -2  10     359    1886                                                         284    0.55    0.00  1.0000
   2  -2  10     567     421                                                         472    0.55    0.00  1.0000
   2  -2  11     396     480                                                         234   -1.85    0.00  1.0000
   2  -2  12    1009     615                                                        1526    1.75    0.01  1.0000
   2  -2  13     386     567                                                         558   -0.95    0.00  1.0000
   2  -2  14    1831     788                                                        1777    0.15    0.00  1.0000
   2  -2  15    2154     877                                                        2295    0.35    0.00  1.0000
   2  -2  16     493     695                                                         400   -0.53   -0.01  1.0000
  -2   1  16       7     754                                                           4    0.19   -0.01  1.0000
  -2   1  15    5510    1247                                                        5664    0.24    0.01  1.0000
  -2   1  14      55     737                                                         122   -1.02    0.00  1.0000
  -2   1  13   15879    1552                                                       14011    1.78   -0.01  1.0000
  -2   1  12     463     579                                                         131   -2.34    0.01  1.0000
  -2   1  11     137     488                                                        -407    2.71    0.00  1.0000
  -2   1  11    7015    1131                                                        9085    2.71    0.00  1.0000
  -2   1  10       9     431                                                         225   -2.85    0.01  1.0000
  -2   1  10     151     413                                                         -43   -2.85    0.01  1.0000
  -2   1   9    2541     557                                                        1622    2.52   -0.01  1.0000
  -2   1   9     118     361                                                         -22    2.52   -0.01  1.0000
  -2   1   8     380     186                                                         174   -1.50    0.01  1.0000
  -2   1   8     612     412                                                         341   -1.50    0.01  1.0000
  -2   1   7   20519    1282                                                       20153   -0.30    0.00  1.0000
  -2   1   7   20118     860                                                       19755   -0.30    0.00  1.0000
  -2   1   6   13303     914                                                       10858    2.60   -0.01  1.0000
  -2   1   6   12795     639                                                       10400    2.60   -0.01  1.0000
  -2   1   5   27781    1115                                                       33799   -4.00    0.01  1.0000
  -2   1   5   24426    1345                                                       30086   -4.00    0.01  1.0000
  -2   1   4   57520    1705                                                       61876    2.07   -0.01  1.0000
  -2   1   4   60623    1508                                                       65092    2.07   -0.01  1.0000
  -2   1   3   61611    1645                                                       71038    4.26    0.01  1.0000
  -2   1   3   62433    1569                                                       71920    4.26    0.01  1.0000
  -2   1   2   78613    1822                                                      110400  -12.06   -0.01  1.0000
  -2   1   2   79256    1898                                                      111161  -12.06   -0.01  1.0000
   2  -1  -1  136215    1309                                                       90788   15.74   -0.01  1.0000
  -2   1   1  128609    1618                                                       84596   15.74    0.01  1.0000
  -2   1   1  133239    1516                                                       88359   15.74    0.01  1.0000
  -2   1   0   71274    1172                                                       45761  -12.33    0.00  1.0000
   2  -1   0   69895     934                                                       44658  -12.33    0.00  1.0000
  -2   1  -1      86     197                                                         869    4.88    0.00  1.0000
   2  -1   1      96     183                                                         899    4.88    0.00  1.0000
  -2   1  -2    7647     444                                                        7004    0.89    0.00  1.0000
   2  -1   2    7585     483                                                        6946    0.89    0.00  1.0000
  -2   1  -3  100133    1530                                                       93197   -2.59    0.00  1.0000
   2  -1   3   95249    1858                                                       88487   -2.59    0.00  1.0000
  -2   1  -4   69548    1341                                                       75766    2.68    0.00  1.0000
   2  -1   4   74601    1965                                                       81034    2.68    0.00  1.0000
   2  -1   5    4393     669                                                        7079   -4.17    0.01  1.0000
   2  -1   6   30234    1204                                                       21232    6.59   -0.01  1.0000
   2  -1   7    1154     882                                                          12   -7.14    0.01  1.0000
   2  -1   8    9589    1067                                                       13800    4.60    0.01  1.0000
   2  -1   9   16318    1306                                                       17287   -0.87   -0.02  1.0000
   2  -1   9      14    1355                                                        -358   -0.87   -0.02  1.0000
   2  -1  10   37238    2003                                                       39580   -1.39    0.02  1.0000
   2  -1  11      38    1818                                                        -278    1.43   -0.01  1.0000
   2  -1  11     652     581                                                        1002    1.43   -0.01  1.0000
   2  -1  12    7086    1000                                                        6744   -0.48    0.00  1.0000
   2  -1  13     567     627                                                         598   -0.15   -0.01  1.0000
   2  -1  14    1108     728                                                        1181    0.25    0.01  1.0000
   2  -1  15    2857     930                                                        2753   -0.23   -0.01  1.0000
   2  -1  16    1293     776                                                        1199    0.31    0.01  1.0000
  -2   0  16    6088    1320                                                        6123   -0.05    0.00  1.0000
  -2   0  15    2998     992                                                        2782   -0.47    0.01  1.0000
  -2   0  14    4990    1180                                                        5808    1.29   -0.01  1.0000
  -2   0  13     285     682                                                         674   -2.15    0.01  1.0000
  -2   0  12    1126     716                                                        2101    2.88    0.00  1.0000
  -2   0  11     214     497                                                        -102   -3.40    0.00  1.0000
  -2   0  11   10193    1056                                                        7458   -3.40    0.00  1.0000
  -2   0  10     204     440                                                          -1    3.32    0.00  1.0000
  -2   0  10   29947    1713                                                       25222    3.32    0.00  1.0000
  -2   0   9      27     403                                                          17   -2.15    0.00  1.0000
  -2   0   9   71802    2738                                                       76849   -2.15    0.00  1.0000
  -2   0   8  113494    1962                                                      112575   -0.32    0.01  1.0000
  -2   0   8  110131    3065                                                      109226   -0.32    0.01  1.0000
  -2   0   7   69701    2444                                                       78585    3.80   -0.01  1.0000
  -2   0   7   76331    1727                                                       85615    3.80   -0.01  1.0000
  -2   0   6   33878    1727                                                       46470   -7.33    0.01  1.0000
  -2   0   6   37190    1347                                                       50336   -7.33    0.01  1.0000
  -2   0   5   47683    1338                                                       32098    9.14   -0.01  1.0000
  -2   0   5   47344    1070                                                       31820    9.14   -0.01  1.0000
  -2   0   5   51630    1314                                                       35351    9.14   -0.01  1.0000
  -2   0   4    6171     774                                                       12174   -7.40    0.00  1.0000
  -2   0   4    6090     662                                                       12060   -7.40    0.00  1.0000
  -2   0   3   22226     939                                                       25405    2.40   -0.01  1.0000
  -2   0   3   23022    1033                                                       26255    2.40   -0.01  1.0000
  -2   0   2   53094    1272                                                       48315    2.46    0.00  1.0000
  -2   0   2   54010    1323                                                       49190    2.46    0.00  1.0000
  -2   0   1    2092     363                                                        3578   -3.35    0.00  1.0000
   2   0  -1    1973     334                                                        3421   -3.35    0.00  1.0000
  -2   0   0  195753    2476                                                      196319    0.15   -0.01  1.0000
   2   0   0  199812    2409                                                      200386    0.15    0.01  1.0000
  -2   0  -1   41253    1041                                                       35716    3.29    0.01  1.0000
   2   0   1   44250    1126                                                       38513    3.29   -0.01  1.0000
  -2   0  -2  111622    1887                                                      122303   -3.63   -0.01  1.0000
   2   0   2  108166    2138                                                      118680   -3.63    0.01  1.0000
   2   0   3   88377    2028                                                       93161    1.85    0.00  1.0000
   2   0   4  214174    3259                                                      208697   -1.39    0.01  1.0000
   2   0   5    9108     675                                                        6504    3.45   -0.01  1.0000
   2   0   6  168210    3562                                                      188276   -5.53    0.01  1.0000
   2   0   7     209     450                                                        1220    4.75    0.01  1.0000
   2   0   8      41     994                                                        -100   -1.48   -0.03  1.0000
   2   0   8   17827    1260                                                       16164   -1.48   -0.03  1.0000
   2   0   9     575     401                                                         342   -1.35    0.04  1.0000
   2   0  10    6602    1021                                                        7895    1.77   -0.03  1.0000
   2   0  11       5    2281                                                        -254   -0.52    0.01  1.0000
   2   0  11    3668     812                                                        3409   -0.52    0.01  1.0000
   2   0  12     294    1993                                                         369   -0.49   -0.01  1.0000
   2   0  12    7270    1148                                                        7630   -0.49   -0.01  1.0000
   2   0  13   29812    2062                                                       29092    0.49    0.01  1.0000
   2   0  14     517     662                                                         498   -0.10   -0.01  1.0000
   2   0  15   24766    2131                                                       24734   -0.02    0.00  1.0000
  -2  -1  16    2838    1101                                                        2958    0.26    0.00  1.0000
  -2  -1  15     294     787                                                         292    0.02    0.00  1.0000
  -2  -1  14   32887    2358                                                       33872   -0.63    0.00  1.0000
  -2  -1  13    3437     829                                                        2787    1.37    0.01  1.0000
  -2  -1  12   38501    2152                                                       35104   -2.06   -0.01  1.0000
  -2  -1  11   16585    1550                                                       19393    2.45    0.01  1.0000
  -2  -1  10    2038     679                                                        2877   -2.02    0.00  1.0000
  -2  -1   9   54714    2284                                                       54337    0.19    0.01  1.0000
  -2  -1   8   26348    1399                                                       22165    3.12   -0.01  1.0000
  -2  -1   7     262     362                                                         239   -7.15    0.01  1.0000
  -2  -1   7    8469    1321                                                       14802   -7.15    0.01  1.0000
  -2  -1   6   18878    1499                                                       33306   10.47    0.00  1.0000
  -2  -1   5   52482    1365                                                       32216  -11.54   -0.01  1.0000
  -2  -1   5   57057    1427                                                       35822  -11.54   -0.01  1.0000
  -2  -1   4    2431     658                                                        8323    9.82    0.01  1.0000
  -2  -1   3  179001    2994                                                      204132   -6.68   -0.01  1.0000
   2   1  -2  287995    3215                                                      267365    4.55   -0.01  1.0000
  -2  -1   2  288844    3279                                                      268180    4.55    0.01  1.0000
   2   1  -1   49020    1254                                                       40995   -4.42    0.01  1.0000
   2   1   0  102035    2111                                                      114719    4.51   -0.01  1.0000
   2   1   1  117876    2265                                                      125405   -2.51    0.01  1.0000
   2   1   2  201092    3055                                                      205807   -1.22    0.00  1.0000
   2   1   3   97308    2126                                                       87753    3.65    0.00  1.0000
   2   1   4    4596     646                                                        6320   -2.72    0.00  1.0000
   2   1   5   54454    1876                                                       54285   -0.08    0.00  1.0000
   2   1   6   71574    2350                                                       75066    1.50    0.01  1.0000
   2   1   7   18255    1247                                                       18001   -0.22   -0.03  1.0000
   2   1   8   49058    2192                                                       52742   -1.90    0.03  1.0000
   2   1   9   61459    2429                                                       56467    2.41   -0.03  1.0000
   2   1  10     793     554                                                        1065   -1.05    0.01  1.0000
   2   1  11   47431    2460                                                       46556   -0.47    0.00  1.0000
   2   1  11     842    2815                                                         729   -0.47    0.00  1.0000
   2   1  12    4988    1021                                                        5526    0.86    0.00  1.0000
   2   1  13   22376    1914                                                       22913   -0.42    0.00  1.0000
   2   1  14    4051    1049                                                        4031    0.04   -0.01  1.0000
   2   1  15     233     763                                                         232   -0.01    0.01  1.0000
  -2  -2  17    3375    1133                                                        3128    0.51    0.00  1.0000
  -2  -2  16    4132    1062                                                        3660   -0.90    0.01  1.0000
  -2  -2  15   16534    1879                                                       17580    0.94   -0.01  1.0000
  -2  -2  14    2278     851                                                        2486   -0.50    0.01  1.0000
  -2  -2  13   33749    2302                                                       34065   -0.20   -0.01  1.0000
  -2  -2  12     203     541                                                         106    0.92    0.00  1.0000
  -2  -2  11    1450     573                                                        1032   -1.39    0.00  1.0000
  -2  -2  10    7846    1054                                                        8650    1.03    0.00  1.0000
  -2  -2   9   55401    2369                                                       56836    0.70    0.00  1.0000
  -2  -2   8     566     347                                                         126   -3.63    0.00  1.0000
  -2  -2   7  143844    3063                                                      123104    6.61    0.01  1.0000
  -2  -2   7     810     414                                                         -87    6.61    0.01  1.0000
  -2  -2   6  135649    3293                                                      162866   -8.20   -0.01  1.0000
  -2  -2   5   64936    2219                                                       83327    7.87    0.01  1.0000
  -2  -2   5   73695    2439                                                       93212    7.87    0.01  1.0000
  -2  -2   4  303718    3857                                                      273913   -6.45   -0.01  1.0000
  -2  -2   3   19949     843                                                       13878    5.44    0.00  1.0000
   2   2  -2   79281    2141                                                       92433   -5.23    0.00  1.0000
   2   2  -1  208971    3060                                                      191857    4.44    0.00  1.0000
   2   2   0    4988     576                                                        5898   -1.43    0.00  1.0000
   2   2   1   41877    1343                                                       36373   -3.23    0.01  1.0000
   2   2   2  160113    3155                                                      184205    6.75   -0.01  1.0000
   2   2   3   29274    1105                                                       20145   -6.82    0.01  1.0000
   2   2   4  141366    2869                                                      128242    4.15   -0.01  1.0000
   2   2   5  264263    4423                                                      271577   -1.64    0.01  1.0000
   2   2   6     174     354                                                          64    1.24   -0.01  1.0000
   2   2   7  109288    2989                                                      103195   -2.18    0.01  1.0000
   2   2   7    1051     938                                                         531   -2.18    0.01  1.0000
   2   2   8    4661     862                                                        6184    2.41   -0.01  1.0000
   2   2   8     108     694                                                         -85    2.41   -0.01  1.0000
   2   2   9    1891     660                                                        2300   -1.15    0.00  1.0000
   2   2  10   24112    1773                                                       24814   -0.52    0.01  1.0000
   2   2  10   24656    1813                                                       25366   -0.52    0.01  1.0000
   2   2  11      69     604                                                         163    1.25   -0.01  1.0000
   2   2  12     401     666                                                         252   -0.97    0.01  1.0000
   2   2  13    3622    1017                                                        3888    0.51   -0.01  1.0000
   2   2  14    6069    1150                                                        5857   -0.32    0.01  1.0000
  -2  -3  17    2612    1195                                                        2967   -0.79    0.01  1.0000
  -2  -3  16     592     811                                                         376    1.39   -0.01  1.0000
  -2  -3  15      42     878                                                         -47   -1.51    0.01  1.0000
  -2  -3  15     430     809                                                         741   -1.51    0.01  1.0000
  -2  -3  14    1055     780                                                        1364    1.03   -0.01  1.0000
  -2  -3  14   23657    2222                                                       25045    1.03   -0.01  1.0000
  -2  -3  13   15667    1619                                                       15403   -0.25   -0.01  1.0000
  -2  -3  12    4492     947                                                        4845   -0.60    0.01  1.0000
  -2  -3  11   15766    1421                                                       14494    1.21   -0.01  1.0000
  -2  -3  10   61018    2653                                                       63292   -1.06    0.01  1.0000
  -2  -3   9   21808    1474                                                       21566   -0.19    0.00  1.0000
  -2  -3   9      18     589                                                          11   -0.19    0.00  1.0000
  -2  -3   8       2     509                                                          98    2.02    0.00  1.0000
  -2  -3   8  103669    3085                                                      109332    2.02    0.00  1.0000
  -2  -3   7   10053     817                                                        7491   -3.18    0.00  1.0000
  -2  -3   6   10644     824                                                        8245    2.91    0.00  1.0000
  -2  -3   6   10996     934                                                        8555    2.91    0.00  1.0000
  -2  -3   5   94196    2687                                                       99290   -1.90    0.00  1.0000
  -2  -3   5   93972    2558                                                       99060   -1.90    0.00  1.0000
  -2  -3   4    9451     839                                                       10927    1.70   -0.01  1.0000
   2   3  -3   14251     873                                                       11509   -2.81   -0.01  1.0000
   2   3  -2   39620    1696                                                       46193    3.69    0.01  1.0000
   2   3  -1  129002    2688                                                      122101   -2.26   -0.01  1.0000
   2   3   0   23986    1248                                                       26001   -1.49    0.01  1.0000
   2   3   1  357632    4374                                                      332479    4.98   -0.01  1.0000
   2   3   2   18587     919                                                       12574   -5.62    0.01  1.0000
   2   3   3  122936    2963                                                      133752    3.52    0.00  1.0000
   2   3   4   21050    1210                                                       19644   -1.15    0.00  1.0000
   2   3   5   17727    1190                                                       17161    0.50    0.00  1.0000
   2   3   6    9550    1035                                                       10620   -1.24    0.00  1.0000
   2   3   7    1313     563                                                        1862    1.61    0.01  1.0000
   2   3   8     204     416                                                         295   -0.69   -0.01  1.0000
   2   3   9    2379     663                                                        2076   -0.75    0.01  1.0000
   2   3  10   25612    1875                                                       27704    1.50    0.00  1.0000
   2   3  11    2102     854                                                        2651   -1.31    0.00  1.0000
   2   3  11    2203     823                                                        2765   -1.31    0.00  1.0000
   2   3  12   33077    2308                                                       31744    0.86    0.00  1.0000
   2   3  13     998     764                                                        1186   -0.67    0.00  1.0000
   2   3  14   12586    1653                                                       13132    0.56    0.00  1.0000
  -2  -4  16    2215     919                                                        1757   -1.21    0.00  1.0000
  -2  -4  15    4396    1058                                                        3745    1.19    0.00  1.0000
  -2  -4  15     341     953                                                         179    1.19    0.00  1.0000
  -2  -4  14   10490    1484                                                       11050   -0.63   -0.01  1.0000
  -2  -4  14     149     778                                                         223   -0.63   -0.01  1.0000
  -2  -4  13    6808    1166                                                        6703   -0.15    0.01  1.0000
  -2  -4  13     124     831                                                         110   -0.15    0.01  1.0000
  -2  -4  12      13     679                                                         -99    0.82   -0.01  1.0000
  -2  -4  12    9178    1257                                                        9861    0.82   -0.01  1.0000
  -2  -4  11      23     660                                                         -16   -1.11    0.01  1.0000
  -2  -4  11    3319     754                                                        2789   -1.11    0.01  1.0000
  -2  -4  10    9641    1082                                                        9014    0.76    0.00  1.0000
  -2  -4  10      11     660                                                         -95    0.76    0.00  1.0000
  -2  -4   9    3361     682                                                        3294    0.14   -0.01  1.0000
  -2  -4   9     360     667                                                         338    0.14   -0.01  1.0000
  -2  -4   8   20613    1453                                                       21643   -0.82    0.01  1.0000
  -2  -4   7    5714     754                                                        5380    0.52   -0.01  1.0000
  -2  -4   7    1134     714                                                         988    0.52   -0.01  1.0000
  -2  -4   6   42197    1841                                                       43146    0.53    0.01  1.0000
  -2  -4   6   47634    2124                                                       48642    0.53    0.01  1.0000
  -2  -4   5   20471    1198                                                       19333   -0.94   -0.01  1.0000
  -2  -4   5   20567    1297                                                       19427   -0.94   -0.01  1.0000
   2   4  -4    4318     652                                                        4558   -0.42   -0.01  1.0000
   2   4  -3   34520    1512                                                       30279    2.76    0.00  1.0000
   2   4  -2      27     320                                                         157   -3.80    0.00  1.0000
   2   4  -1   44236    1847                                                       48566    2.35    0.01  1.0000
   2   4   0      85     262                                                          96    0.14    0.00  1.0000
   2   4   1    2436     444                                                        2074   -1.07   -0.01  1.0000
   2   4   2     100     295                                                         120   -0.23    0.01  1.0000
   2   4   3     172     328                                                         442    1.88   -0.01  1.0000
   2   4   4    2292     594                                                        3120   -1.89    0.00  1.0000
   2   4   5       2     376                                                         -57    0.36   -0.01  1.0000
   2   4   6   15302    1289                                                       16315    0.94    0.01  1.0000
   2   4   7   15767    1343                                                       16664   -0.82   -0.01  1.0000
   2   4   8    5052     863                                                        5184   -0.22    0.00  1.0000
   2   4   9     969     550                                                         733    0.96    0.01  1.0000
   2   4  10   19797    1625                                                       18704   -0.92   -0.01  1.0000
   2   4  11    3288     927                                                        3593    0.60    0.01  1.0000
   2   4  11    2779     912                                                        3059    0.60    0.01  1.0000
   2   4  12    3202    1032                                                        3462   -0.53   -0.01  1.0000
   2   4  13     134     755                                                         193    0.59    0.01  1.0000
  -2  -5  14       0     659                                                        -156   -0.14    0.00  1.0000
  -2  -5  13    1786     784                                                        2017    0.62    0.00  1.0000
  -2  -5  12     153     566                                                         230   -0.65    0.00  1.0000
  -2  -5  11    8490    1137                                                        8363    0.16    0.01  1.0000
  -2  -5  10    5317     934                                                        5684    0.57   -0.01  1.0000
  -2  -5   9    7574     955                                                        6837   -1.02    0.01  1.0000
  -2  -5   8     689     629                                                         539    0.70   -0.01  1.0000
  -2  -5   8     648     435                                                         503    0.70   -0.01  1.0000
  -2  -5   7   10893    1036                                                       10657    0.26    0.01  1.0000
  -2  -5   7   11009    1233                                                       10772    0.26    0.01  1.0000
  -2  -5   6    3495     792                                                        4018   -0.99    0.00  1.0000
   2   5  -5   11721    1100                                                       12071    0.37    0.00  1.0000
   2   5  -4   13125    1048                                                       11531    1.67   -0.01  1.0000
   2   5  -3    1324     609                                                        2712   -3.72    0.01  1.0000
   2   5  -2    8933    1062                                                       12639    4.17   -0.01  1.0000
   2   5  -1   29448    1450                                                       25050   -3.10    0.00  1.0000
   2   5   0   27820    1455                                                       24707    2.24   -0.01  1.0000
   2   5   1    2814     644                                                        4195   -2.74    0.01  1.0000
   2   5   2    3236     742                                                        5248    3.66   -0.01  1.0000
   2   5   3    1021     410                                                         335   -3.20    0.00  1.0000
   2   5   4   12102    1066                                                       11143    1.04    0.01  1.0000
   2   5   5      29     413                                                         -25    1.25    0.00  1.0000
   2   5   6   33531    1789                                                       30302   -2.10    0.00  1.0000
   2   5   7    6580     905                                                        5550    1.54    0.00  1.0000
   2   5   8    7381    1048                                                        7903   -0.70    0.01  1.0000
   2   5   9      51     554                                                          73    0.36   -0.01  1.0000
   2   5  10   10059    1249                                                        9788   -0.32    0.01  1.0000
   2   5  11    1832     754                                                        1794    0.11    0.00  1.0000
   2   5  11    1584     785                                                        1549    0.11    0.00  1.0000
   2   5  12    5406    1146                                                        5258    0.24    0.00  1.0000
   2   5  12    6111    1210                                                        5954    0.24    0.00  1.0000
  -2  -6  16     217    1091                                                         217    0.00    0.00  1.0000
  -2  -6  15     676    1145                                                         733   -0.25   -0.01  1.0000
  -2  -6  14       8     971                                                          -8    0.66    0.01  1.0000
  -2  -6  11      20     776                                                        -196    1.04   -0.01  1.0000
  -2  -6  11     981     674                                                        1280    1.04   -0.01  1.0000
  -2  -6  10    7278     969                                                        6142   -1.61    0.00  1.0000
  -2  -6  10    5961    1302                                                        4938   -1.61    0.00  1.0000
  -2  -6   9      11     460                                                           8    1.22    0.00  1.0000
  -2  -6   9      28     647                                                         -59    1.22    0.00  1.0000
  -2  -6   8    2004     805                                                        2065   -0.16    0.00  1.0000
  -2  -6   8    3306     723                                                        3384   -0.16    0.00  1.0000
  -2  -6   7     575     611                                                         738   -0.75    0.01  1.0000
   2   6  -6   10246    1168                                                       10916    0.76    0.01  1.0000
   2   6  -5   25246    1702                                                       25644    0.29   -0.02  1.0000
   2   6  -4    9488    1127                                                       11016   -1.76    0.02  1.0000
   2   6  -3   20944    1357                                                       17808    2.63   -0.01  1.0000
   2   6  -2   10795    1185                                                       13135   -2.49    0.00  1.0000
   2   6  -1    8690    1027                                                       10396    2.03    0.00  1.0000
   2   6   0    2006     480                                                        1251   -2.19    0.00  1.0000
   2   6   1    6979     951                                                        9081    2.73    0.00  1.0000
   2   6   2   23615    1412                                                       20553   -2.39   -0.01  1.0000
   2   6   3    5793     801                                                        5461    0.51    0.01  1.0000
   2   6   4   14324    1191                                                       12402    1.95   -0.01  1.0000
   2   6   5    5170     710                                                        3294   -3.40    0.01  1.0000
   2   6   6    9446    1233                                                       12363    3.30   -0.01  1.0000
   2   6   7     110     499                                                         -77   -2.43    0.01  1.0000
   2   6   8   18247    1487                                                       16315    1.72   -0.01  1.0000
   2   6   9     282     575                                                         500   -1.29    0.00  1.0000
   2   6  10    7974    1267                                                        8592    0.79    0.00  1.0000
   2   6  11      29     744                                                          38   -0.17   -0.01  1.0000
   2   6  11      66     588                                                          78   -0.17   -0.01  1.0000
   2   6  12      40     738                                                          29   -0.22    0.01  1.0000
   2   6  12     176     824                                                         152   -0.22    0.01  1.0000
  -2  -7  15    2940    1473                                                        3195    0.54    0.01  1.0000
  -2  -7  14      12     954                                                        -316   -0.80   -0.01  1.0000
  -2  -7  13    1856    1152                                                        1682    0.48    0.01  1.0000
  -2  -7  12    4870    1367                                                        4565    0.52    0.00  1.0000
  -2  -7  11    9125    1583                                                       10320   -1.41   -0.01  1.0000
  -2  -7  10   15378    1966                                                       16743    1.25    0.01  1.0000
  -2  -7   9   28703    2235                                                       28594   -0.07   -0.01  1.0000
  -2  -7   8      34     558                                                          97   -1.15    0.01  1.0000
   2   7  -7   14009    1369                                                       12500    1.53    0.01  1.0000
   2   7  -6    6154    1056                                                        6887   -1.05   -0.01  1.0000
   2   7  -5   13429    1367                                                       13745    0.32    0.00  1.0000
   2   7  -4   17249    1475                                                       17379    0.11    0.00  1.0000
   2   7  -3   10987    1186                                                       10898   -0.10   -0.01  1.0000
   2   7  -2    3893     760                                                        3882   -0.02    0.01  1.0000
   2   7  -1   50152    2341                                                       50583   -0.22   -0.01  1.0000
   2   7   0   37952    1912                                                       36626    0.80    0.01  1.0000
   2   7   1     629     462                                                         451   -0.96   -0.01  1.0000
   2   7   2   50364    2322                                                       50398    0.02    0.01  1.0000
   2   7   3    5776     939                                                        6982    1.75   -0.01  1.0000
   2   7   4   24402    1823                                                       28860   -3.19    0.00  1.0000
   2   7   5      30     515                                                         201    3.44    0.00  1.0000
   2   7   6    4350     758                                                        2931   -2.75    0.00  1.0000
   2   7   7    3158     924                                                        4174    1.95    0.00  1.0000
   2   7   8    2451     704                                                        1875   -1.45   -0.01  1.0000
   2   7   9    1064     783                                                        1350    1.01    0.01  1.0000
   2   7  10    3488     977                                                        3693   -0.40   -0.01  1.0000
   2   7  11   13992    1722                                                       14140   -0.15    0.01  1.0000
   2   7  11   13881    1612                                                       14028   -0.15    0.01  1.0000
   2   7  12     198     684                                                         237    0.31    0.00  1.0000
  -2  -8  14    3151    1296                                                        3481    0.67    0.00  1.0000
  -2  -8  13    6512    1472                                                        6377   -0.20    0.01  1.0000
  -2  -8  12     763     972                                                         935   -0.68   -0.01  1.0000
  -2  -8  11    7663    1413                                                        6890    1.06    0.01  1.0000
  -2  -8  10    2224    1068                                                        2358   -0.33   -0.01  1.0000
  -2  -8   9      90     707                                                         184   -0.96    0.00  1.0000
   2   8  -9     124     677                                                         232   -0.96    0.00  1.0000
   2   8  -8   10548    1489                                                       12111    1.71    0.00  1.0000
   2   8  -7   16880    1585                                                       15186   -1.56    0.00  1.0000
   2   8  -6     386     590                                                         225    1.09    0.00  1.0000
   2   8  -5   19491    1758                                                       20644   -0.95    0.02  1.0000
   2   8  -4   39576    2258                                                       37613    1.16   -0.02  1.0000
   2   8  -3   13133    1290                                                       11894   -1.29    0.01  1.0000
   2   8  -2   80385    3129                                                       82787    0.98    0.00  1.0000
   2   8  -1     130     465                                                         106   -0.29   -0.01  1.0000
   2   8   0   17754    1464                                                       18094   -0.30    0.01  1.0000
   2   8   1    9350    1116                                                        9154    0.24    0.00  1.0000
   2   8   2    1411     606                                                        1232    0.57    0.00  1.0000
   2   8   3    1775     621                                                        1256   -1.56   -0.01  1.0000
   2   8   4   12763    1402                                                       14758    1.98    0.01  1.0000
   2   8   5    1211     602                                                         781   -1.62   -0.01  1.0000
   2   8   6   22511    1749                                                       21248    0.99    0.01  1.0000
   2   8   7   20058    1752                                                       20849   -0.65   -0.01  1.0000
   2   8   8    2492     862                                                        2747    0.58    0.01  1.0000
   2   8   9   19491    1795                                                       19002   -0.41   -0.01  1.0000
   2   8  10    3375     990                                                        3391    0.03    0.00  1.0000
   2   8  11    1648     873                                                        1561    0.26    0.00  1.0000
  -2  -9  13     341     840                                                         325   -0.10   -0.01  1.0000
  -2  -9  12    9256    1715                                                        9849    0.71    0.01  1.0000
   2   9 -10     306     674                                                         293    0.09    0.01  1.0000
   2   9  -9   10281    1508                                                        9697    0.69   -0.01  1.0000
   2   9  -8   15013    1744                                                       15961   -0.89    0.00  1.0000
   2   9  -7     119     672                                                          74    0.65    0.00  1.0000
   2   9  -6   17286    1682                                                       16643   -0.58    0.01  1.0000
   2   9  -5   14448    1619                                                       15378    0.88   -0.02  1.0000
   2   9  -4   13263    1532                                                       14451   -1.18    0.01  1.0000
   2   9  -3   17521    1597                                                       16367    1.03    0.02  1.0000
   2   9  -2     687     617                                                         589   -0.45   -0.03  1.0000
   2   9  -1   12169    1279                                                       11978   -0.20    0.03  1.0000
   2   9   0    2312     756                                                        2537    0.54   -0.02  1.0000
   2   9   1    1164     786                                                        1070   -0.39    0.01  1.0000
   2   9   2    6189    1014                                                        6241   -0.08   -0.01  1.0000
   2   9   3   28570    1945                                                       27940    0.44    0.01  1.0000
   2   9   4    1052     655                                                        1151   -0.34   -0.01  1.0000
   2   9   5   25153    1909                                                       25051   -0.08    0.00  1.0000
   2   9   6   11109    1365                                                       11420    0.34    0.00  1.0000
   2   9   7    6259    1112                                                        6373   -0.17    0.00  1.0000
   2   9   8    6975    1210                                                        7105   -0.18    0.00  1.0000
   2  10 -12    1639    1035                                                        1868   -0.65    0.00  1.0000
   2  10 -11      10     781                                                        -223    0.72    0.01  1.0000
   2  10 -10    4650    1223                                                        4398   -0.44   -0.01  1.0000
   2  10  -9    3085    1086                                                        3159    0.15    0.00  1.0000
   2  10  -8    1413     854                                                        1442   -0.09    0.01  1.0000
   2  10  -7    3683    1081                                                        3672    0.02    0.00  1.0000
   2  10  -6    3595    1020                                                        3443    0.30    0.00  1.0000
   2  10  -5     174     657                                                         104   -0.69    0.00  1.0000
   2  10  -4    4035    1022                                                        4470    0.78    0.02  1.0000
   2  10  -3     360     631                                                         426   -0.43   -0.03  1.0000
   2  10  -2       0     571                                                         -46   -0.07    0.04  1.0000
   2  10  -1   12201    1370                                                       11819    0.41   -0.03  1.0000
   2  10   0     539     594                                                         633   -0.45    0.01  1.0000
   2  10   1   30426    2144                                                       30856    0.29    0.00  1.0000
   2  10   2    1044     685                                                        1014   -0.11    0.00  1.0000
   2  10   3       0     572                                                          -4    0.14    0.00  1.0000
   2  10   4     984     691                                                        1102   -0.43   -0.01  1.0000
   2  10   5    1559     733                                                        1324    0.72    0.01  1.0000
   2  11 -11     889     973                                                        1046   -0.59    0.00  1.0000
   2  11 -10    1980    1077                                                        1775    0.55   -0.01  1.0000
   2  11  -9     153     792                                                         113   -0.42    0.01  1.0000
   2  11  -8     507     861                                                         553    0.24   -0.01  1.0000
   2  11  -7     329     801                                                         339    0.07    0.01  1.0000
   2  11  -6    1650     878                                                        1495   -0.45    0.00  1.0000
   2  11  -5    9791    1445                                                        9225    0.67    0.01  1.0000
   2  11  -4     393     725                                                         308   -0.53   -0.02  1.0000
   2  11  -3      88     665                                                          99    0.14    0.02  1.0000
   2  11  -2     109     574                                                         122    0.16   -0.02  1.0000
   2  11  -1     377     625                                                         345   -0.20    0.00  1.0000
   2  11   0     845     647                                                         832    0.05    0.01  1.0000
   2  11   1     498     664                                                         486    0.06   -0.01  1.0000
   2  11   2    1571     765                                                        1573   -0.01    0.01  1.0000
   2  11   5    1095     817                                                         931   -0.60    0.00  1.0000
   2  12 -10       1    1140                                                        -782   -0.26    0.01  1.0000
   2  12  -9      52     905                                                          62    0.15   -0.01  1.0000
   2  12  -8     220     867                                                         223    0.02    0.00  1.0000
   2  12  -7    1615    1076                                                        1706   -0.26    0.00  1.0000
   2  12  -6     243     756                                                         312    0.49   -0.01  1.0000
   2  12  -5     821     789                                                         957   -0.53    0.00  1.0000
   2  12  -4      29     748                                                          44    0.28    0.00  1.0000
   2  12  -3    1009     762                                                        1026    0.06    0.00  1.0000
   2  12  -2    1000     791                                                        1058   -0.21   -0.01  1.0000
   2  12   4     368     795                                                         329   -0.25    0.00  1.0000
   2  13  -8    1683    1271                                                        1670   -0.04    0.01  1.0000
   2  13  -7    2567    1247                                                        2624    0.13   -0.01  1.0000
  -3  15  -2     868     954                                                         892    0.09    0.00  1.0000
  -3  15  -3    3225    1089                                                        3126   -0.21    0.01  1.0000
  -3  15  -4     395     824                                                         443    0.28   -0.01  1.0000
  -3  15  -5       2     706                                                        -202   -0.32    0.01  1.0000
  -3  15  -6     116     794                                                          74    0.50   -0.01  1.0000
  -3  15  -7    1356     927                                                        1620   -0.80    0.01  1.0000
  -3  15  -8     196     848                                                          99    0.94   -0.01  1.0000
  -3  14   4    1360     905                                                        1367   -0.02    0.00  1.0000
  -3  14   3    4002    1108                                                        4008   -0.01    0.00  1.0000
  -3  14   2       0     692                                                         -38   -0.16    0.01  1.0000
  -3  14   1     364     727                                                         431    0.39   -0.01  1.0000
  -3  14   0    1981     922                                                        1812   -0.45    0.01  1.0000
  -3  14  -1     251     624                                                         296    0.32    0.00  1.0000
  -3  14  -2    6403    1300                                                        6531   -0.19    0.00  1.0000
  -3  14  -3    2387     993                                                        2327    0.15    0.00  1.0000
  -3  14  -4     524     735                                                         486   -0.20    0.00  1.0000
  -3  14  -5    2721     914                                                        2893    0.38    0.00  1.0000
  -3  14  -6    1207     777                                                        1005   -0.71    0.00  1.0000
  -3  14  -7      18     716                                                        -275    0.99    0.00  1.0000
  -3  14  -8    3283    1011                                                        3800   -1.01    0.00  1.0000
   3 -14   9      14    1150                                                        -261    0.87   -0.01  1.0000
   3 -14  10      13    1130                                                         -17   -0.84    0.01  1.0000
  -3  13   6    1434     882                                                        1550    0.35   -0.01  1.0000
  -3  13   5    1751     854                                                        1697   -0.15    0.01  1.0000
  -3  13   4     352     615                                                         328   -0.15   -0.01  1.0000
  -3  13   3    1409     828                                                        1489    0.24    0.01  1.0000
  -3  13   2    1907     872                                                        1908    0.00    0.00  1.0000
  -3  13   1   13081    1612                                                       13358   -0.28    0.00  1.0000
  -3  13   0    1364     814                                                        1296    0.22    0.00  1.0000
  -3  13  -1    6351    1181                                                        6464    0.17    0.00  1.0000
  -3  13  -2    7177    1186                                                        6830   -0.48    0.01  1.0000
  -3  13  -3    3435     895                                                        3210    0.45   -0.01  1.0000
  -3  13  -4    3922     963                                                        3985   -0.12    0.01  1.0000
  -3  13  -5     268     680                                                         312   -0.30   -0.01  1.0000
  -3  13  -6     431     699                                                         542    0.59    0.01  1.0000
   3 -13   7     460    1046                                                         352   -0.63    0.01  1.0000
  -3  13  -7    3760     922                                                        3438   -0.63   -0.01  1.0000
  -3  13  -8    1860     781                                                        2052    0.51    0.01  1.0000
  -3  12   7    1018     762                                                        1102    0.30   -0.01  1.0000
  -3  12   6     711     716                                                         741   -0.13    0.01  1.0000
  -3  12   5    1828     819                                                        1938   -0.30   -0.01  1.0000
  -3  12   4    2355     807                                                        2066    0.72    0.00  1.0000
  -3  12   3    8087    1185                                                        7552   -0.71    0.00  1.0000
  -3  12   2   13429    1508                                                       13730    0.30   -0.01  1.0000
  -3  12   1       5     562                                                           5   -0.09    0.01  1.0000
  -3  12   0   10159    1319                                                        9752    0.48   -0.01  1.0000
  -3  12  -1    2430     866                                                        2909   -1.08    0.01  1.0000
  -3  12  -2    1470     818                                                        1885    1.18   -0.01  1.0000
  -3  12  -3    1333     730                                                        1157   -0.59    0.01  1.0000
  -3  12  -4     533     608                                                         488   -0.23    0.00  1.0000
  -3  12  -5     359     622                                                         261    0.68    0.00  1.0000
  -3  12  -6    2272     783                                                        2515   -0.59    0.00  1.0000
  -3  12  -7    7573    1111                                                        7398    0.23    0.00  1.0000
  -3  12  -8    4081     884                                                        4082    0.00    0.00  1.0000
  -3  11   7    2316     774                                                        2380    0.16    0.00  1.0000
  -3  11   6    5617    1027                                                        5367   -0.39    0.00  1.0000
  -3  11   5      11     670                                                        -595    0.78    0.00  1.0000
  -3  11   4    7221    1124                                                        7882   -0.89    0.01  1.0000
  -3  11   3     168     530                                                         222    0.45   -0.01  1.0000
  -3  11   2    1400     635                                                        1418    0.06    0.01  1.0000
  -3  11   1     642     585                                                         666    0.11    0.00  1.0000
  -3  11   0    2795     747                                                        2397   -0.91    0.00  1.0000
  -3  11  -1      43     591                                                         143    1.40    0.00  1.0000
  -3  11  -2    4119     913                                                        4595   -0.84    0.00  1.0000
  -3  11  -3    1666     713                                                        1799   -0.38    0.01  1.0000
  -3  11  -4    2014     741                                                        2521    1.24   -0.01  1.0000
  -3  11  -5    7227    1013                                                        6368   -1.22    0.01  1.0000
  -3  11  -6    1057     622                                                        1230    0.60   -0.01  1.0000
   3 -11   6      30     725                                                          64    0.60    0.01  1.0000
  -3  11  -7     428     500                                                         422    0.03    0.00  1.0000
   3 -11   8       3     942                                                        -309   -0.38    0.00  1.0000
  -3  11  -8    1144     593                                                        1258   -0.38    0.00  1.0000
   3 -11   9       3     924                                                          16    0.52    0.00  1.0000
   3 -11  10     262    1049                                                         191   -0.55    0.00  1.0000
  -3  10  11    2322     956                                                        2230   -0.22    0.00  1.0000
  -3  10  10     622     758                                                         725    0.47    0.00  1.0000
  -3  10   9    5390    1113                                                        5794   -0.63    0.01  1.0000
  -3  10   8      51     522                                                          54    0.61   -0.01  1.0000
  -3  10   7     615     601                                                         506   -0.56    0.01  1.0000
  -3  10   7     366     561                                                         283   -0.56    0.01  1.0000
  -3  10   6    1626     611                                                        1432    0.58   -0.01  1.0000
  -3  10   6    1777     637                                                        1574    0.58   -0.01  1.0000
  -3  10   5    2672     745                                                        2867   -0.43    0.01  1.0000
  -3  10   4    1455     613                                                        1402   -0.16   -0.01  1.0000
  -3  10   3    1027     650                                                        1291    0.93    0.00  1.0000
  -3  10   2    1412     635                                                        1764   -1.03    0.00  1.0000
  -3  10   1    3264     769                                                        3332    0.14   -0.01  1.0000
  -3  10   0     214     541                                                         345    0.92    0.01  1.0000
  -3  10  -1       7     468                                                          31   -0.99   -0.01  1.0000
  -3  10  -2     804     537                                                         800   -0.02    0.01  1.0000
  -3  10  -3    4249     799                                                        3663    1.08   -0.02  1.0000
  -3  10  -4     413     505                                                         332   -1.30    0.02  1.0000
  -3  10  -5      32     468                                                          77    0.75   -0.01  1.0000
  -3  10  -6    1317     551                                                        1332   -0.05    0.00  1.0000
  -3  10  -7     131     430                                                         158   -0.47    0.01  1.0000
   3 -10   7     176     828                                                         210   -0.47   -0.01  1.0000
   3 -10   8      12     796                                                          56    0.94    0.01  1.0000
  -3  10  -8     737     509                                                         971    0.94   -0.01  1.0000
   3 -10   9      34     929                                                         -10   -1.36    0.00  1.0000
  -3   9  12     226     772                                                         266   -0.30    0.00  1.0000
  -3   9  11    4395    1105                                                        4732    0.59    0.00  1.0000
  -3   9  10     779     632                                                         595   -0.82    0.01  1.0000
  -3   9   9    4936    1012                                                        4437    0.86   -0.01  1.0000
  -3   9   8    2303     758                                                        2622   -0.75    0.01  1.0000
  -3   9   7   10887    1210                                                       11384    0.55    0.00  1.0000
  -3   9   7    9398    1192                                                        9861    0.55    0.00  1.0000
  -3   9   6    1550     590                                                        1515   -0.11    0.00  1.0000
  -3   9   6    1431     576                                                        1397   -0.11    0.00  1.0000
  -3   9   5    3758     768                                                        4173   -0.77    0.00  1.0000
  -3   9   5    3678     727                                                        4089   -0.77    0.00  1.0000
  -3   9   4    1242     517                                                         761    1.78   -0.01  1.0000
  -3   9   4    1128     392                                                         672    1.78   -0.01  1.0000
  -3   9   3     539     586                                                        1036   -2.08    0.01  1.0000
  -3   9   3     388     396                                                         822   -2.08    0.01  1.0000
  -3   9   2   14053    1232                                                       12873    1.18   -0.01  1.0000
  -3   9   1    1386     532                                                        1491    0.32    0.01  1.0000
  -3   9   0   28410    1711                                                       26695   -1.20    0.00  1.0000
  -3   9  -1     980     566                                                        1262    0.99    0.00  1.0000
  -3   9  -2    6119     900                                                        6401   -0.42   -0.01  1.0000
  -3   9  -3    8895    1024                                                        8632    0.33    0.01  1.0000
  -3   9  -4    4051     727                                                        3685   -0.69    0.00  1.0000
  -3   9  -5    1094     532                                                        1360    0.90   -0.01  1.0000
  -3   9  -6    5417     768                                                        4900   -0.83    0.01  1.0000
  -3   9  -7    3727     649                                                        3244    0.95   -0.01  1.0000
  -3   9  -8    9167    1009                                                       10471   -1.53    0.00  1.0000
   3  -9  13     327    1487                                                         506   -1.05    0.00  1.0000
  -3   8  13    9571    1526                                                        9588   -0.02    0.00  1.0000
  -3   8  12    6052    1223                                                        5930    0.18    0.00  1.0000
  -3   8  11   12674    1491                                                       12274   -0.42    0.00  1.0000
  -3   8  10    4088    1016                                                        4404    0.57    0.00  1.0000
  -3   8   9      73     560                                                         124   -0.67    0.00  1.0000
  -3   8   8    1799     636                                                        2077    0.73    0.01  1.0000
  -3   8   8    1958     705                                                        2249    0.73    0.01  1.0000
  -3   8   7       4     444                                                         -36   -0.48   -0.01  1.0000
  -3   8   7     175     463                                                         234   -0.48   -0.01  1.0000
  -3   8   6   19513    1456                                                       19954   -0.37    0.01  1.0000
  -3   8   6   18550    1405                                                       18979   -0.37    0.01  1.0000
  -3   8   5    1684     607                                                        2255    1.50   -0.01  1.0000
  -3   8   5    1818     565                                                        2410    1.50   -0.01  1.0000
  -3   8   4   32898    1534                                                       29931   -1.96    0.01  1.0000
  -3   8   4   32448    1709                                                       29502   -1.96    0.01  1.0000
  -3   8   3   10437     895                                                       11397    1.07   -0.01  1.0000
  -3   8   3   10003    1065                                                       10943    1.07   -0.01  1.0000
  -3   8   2   60454    1800                                                       59195    0.60    0.00  1.0000
  -3   8   2   62936    2400                                                       61652    0.60    0.00  1.0000
  -3   8   1   17117     924                                                       19177   -1.79    0.01  1.0000
  -3   8   1   19773    1438                                                       21982   -1.79    0.01  1.0000
  -3   8   0   10162    1096                                                       11972    2.00   -0.01  1.0000
  -3   8  -1   17010    1198                                                       14836   -2.01    0.01  1.0000
  -3   8  -1   17613     748                                                       15399   -2.01    0.01  1.0000
  -3   8  -2   31759    1224                                                       35888    2.61    0.00  1.0000
  -3   8  -2   29365    1725                                                       33340    2.61    0.00  1.0000
  -3   8  -3     751     512                                                        1755   -3.36    0.00  1.0000
  -3   8  -4    6870     723                                                        4762    3.23    0.00  1.0000
   3  -8   5      34    1323                                                         214   -2.06   -0.01  1.0000
  -3   8  -5   10481    1056                                                       12370   -2.06    0.01  1.0000
   3  -8   6      17    1386                                                        -284    0.96    0.00  1.0000
  -3   8  -6    3146     555                                                        2703    0.96    0.00  1.0000
  -3   8  -7   52577    2004                                                       50826   -0.89    0.00  1.0000
  -3   8  -8   17595    1262                                                       19534    1.66    0.01  1.0000
   3  -8  11       1    1860                                                       -1041   -0.26    0.01  1.0000
   3  -8  12     299    1526                                                         208   -0.67   -0.01  1.0000
  -3   7  13     230     811                                                         264   -0.36    0.00  1.0000
  -3   7  12     751     759                                                         692    0.26    0.00  1.0000
  -3   7  11    3714    1009                                                        3762   -0.09    0.00  1.0000
  -3   7  10   22470    1864                                                       22757   -0.22   -0.01  1.0000
  -3   7   9    2400     735                                                        2081    0.79    0.01  1.0000
  -3   7   8   60972    2624                                                       58314   -1.27   -0.01  1.0000
  -3   7   8   60052    2303                                                       57415   -1.27   -0.01  1.0000
  -3   7   7   41913    2000                                                       43781    1.05    0.01  1.0000
  -3   7   7   43424    2202                                                       45325    1.05    0.01  1.0000
  -3   7   6   28572    1612                                                       28789   -0.15    0.00  1.0000
  -3   7   6   29878    1719                                                       30100   -0.15    0.00  1.0000
  -3   7   5   38217    1811                                                       38914   -0.41    0.00  1.0000
  -3   7   5   37625    1826                                                       38317   -0.41    0.00  1.0000
  -3   7   4   13687    1013                                                       13338   -0.35    0.00  1.0000
  -3   7   4   13827    1112                                                       13476   -0.35    0.00  1.0000
  -3   7   3   16730    1092                                                       19017    2.00    0.00  1.0000
  -3   7   3   15899    1240                                                       18131    2.00    0.00  1.0000
  -3   7   2      91     109                                                          46   -2.94    0.01  1.0000
  -3   7   2     107     351                                                         168   -2.94    0.01  1.0000
  -3   7   2      88     206                                                          83   -2.94    0.01  1.0000
  -3   7   1     428     339                                                         132    2.46   -0.02  1.0000
  -3   7   1     224      88                                                          28    2.46   -0.02  1.0000
  -3   7   1     672     194                                                         289    2.46   -0.02  1.0000
  -3   7   0   35198    1748                                                       38153   -1.79    0.01  1.0000
  -3   7   0   32194     808                                                       35023   -1.79    0.01  1.0000
   3  -7   0   35122    2574                                                       38074   -1.79   -0.01  1.0000
  -3   7   0   33785     956                                                       36681   -1.79    0.01  1.0000
  -3   7  -1  170801    2072                                                      161926    2.53    0.00  1.0000
  -3   7  -1  157234    3386                                                      148724    2.53    0.00  1.0000
  -3   7  -2   11973    1154                                                       16353   -4.29    0.00  1.0000
  -3   7  -3  259314    4584                                                      281767    5.01    0.00  1.0000
  -3   7  -4   33404    1447                                                       28091   -3.55    0.00  1.0000
  -3   7  -5     869     342                                                         616    1.13    0.01  1.0000
  -3   7  -6   33229    1522                                                       32941    0.19   -0.01  1.0000
  -3   7  -7   11167     889                                                       10979    0.21    0.01  1.0000
   3  -7  13     226    1555                                                         226    0.00    0.00  1.0000
  -3   6  14    6339    1317                                                        6708   -0.54    0.01  1.0000
  -3   6  13     586     798                                                         472    0.60    0.00  1.0000
  -3   6  12   28428    2179                                                       27663   -0.53    0.00  1.0000
  -3   6  11    8048    1211                                                        8227    0.23    0.00  1.0000
  -3   6  10    8612    1146                                                        8171    0.57    0.00  1.0000
  -3   6   9   74931    3119                                                       78982   -1.70    0.00  1.0000
  -3   6   8    1239     525                                                         636    2.38    0.00  1.0000
  -3   6   8    1469     426                                                         804    2.38    0.00  1.0000
  -3   6   7   26365    1561                                                       23530   -2.09    0.01  1.0000
  -3   6   7   26864    1394                                                       24001   -2.09    0.01  1.0000
  -3   6   6    8141     959                                                        9338    1.49   -0.01  1.0000
  -3   6   6    7623     876                                                        8783    1.49   -0.01  1.0000
  -3   6   5     785     432                                                        1294   -1.87    0.01  1.0000
  -3   6   5     765     437                                                        1268   -1.87    0.01  1.0000
  -3   6   4    1653     373                                                         701    3.29   -0.01  1.0000
  -3   6   4    1223     323                                                         432    3.29   -0.01  1.0000
  -3   6   3   67570    2069                                                       76738   -3.97    0.01  1.0000
  -3   6   3   68045    2360                                                       77243   -3.97    0.01  1.0000
  -3   6   2    1101     458                                                        1803    2.32   -0.01  1.0000
  -3   6   2    1164     343                                                        1883    2.32   -0.01  1.0000
  -3   6   1   33245    1538                                                       34099    0.54    0.00  1.0000
  -3   6   1   29738    1020                                                       30546    0.54    0.00  1.0000
  -3   6   0  122397    1547                                                      117488   -1.65    0.00  1.0000
  -3   6   0  117845    1060                                                      113030   -1.65    0.00  1.0000
  -3   6  -1    7146     309                                                        6981   -0.23   -0.01  1.0000
  -3   6  -1   10929     879                                                       10725   -0.23   -0.01  1.0000
  -3   6  -2  728908    6798                                                      708216    2.83    0.01  1.0000
   3  -6   2    1074    1118                                                         423    2.83   -0.01  1.0000
  -3   6  -3   30611    1529                                                       35501   -3.12   -0.01  1.0000
  -3   6  -4    2545     505                                                        2947    0.90    0.01  1.0000
   3  -6   5      32    1703                                                        -698    1.32    0.01  1.0000
  -3   6  -5    8005     772                                                        9049    1.32   -0.01  1.0000
  -3   6  -6    4045     502                                                        3226   -1.60    0.01  1.0000
   3  -6   6    1404    1973                                                         939   -1.60   -0.01  1.0000
   3  -6   7     257    1634                                                         313    0.38    0.00  1.0000
  -3   6  -7    2647     449                                                        2820    0.38    0.00  1.0000
   3  -6  15      99    1730                                                         144    0.50    0.00  1.0000
  -3   5  14    3881    1134                                                        3676    0.39    0.00  1.0000
  -3   5  13    9180    1390                                                        9564   -0.46   -0.01  1.0000
  -3   5  12    1829     793                                                        1968    0.37    0.01  1.0000
  -3   5  11    1986     802                                                        2065    0.21   -0.01  1.0000
  -3   5  10     622     581                                                         365   -1.36    0.00  1.0000
  -3   5   9     525     589                                                        1124    2.49   -0.01  1.0000
  -3   5   8     913     463                                                        1758   -2.75    0.01  1.0000
  -3   5   8     654     581                                                        1390   -2.75    0.01  1.0000
  -3   5   7   48909    1777                                                       44789    2.21   -0.01  1.0000
  -3   5   7   49899    2094                                                       45736    2.21   -0.01  1.0000
  -3   5   6    9904     928                                                       11695   -2.03    0.01  1.0000
  -3   5   6    9588    1023                                                       11352   -2.03    0.01  1.0000
  -3   5   5   44784    1859                                                       50262    2.92   -0.01  1.0000
  -3   5   5   46235    1945                                                       51799    2.92   -0.01  1.0000
  -3   5   4  122035    2609                                                      111511   -3.58    0.00  1.0000
  -3   5   4  127457    2751                                                      116697   -3.58    0.00  1.0000
  -3   5   3    5220     501                                                        4261    1.63    0.00  1.0000
  -3   5   3    5188     581                                                        4232    1.63    0.00  1.0000
  -3   5   2   63402    1529                                                       56727    3.18   -0.01  1.0000
  -3   5   2   65064    1921                                                       58299    3.18   -0.01  1.0000
  -3   5   1    8779    1004                                                       15962   -7.57    0.01  1.0000
  -3   5   1    8110     672                                                       15055   -7.57    0.01  1.0000
  -3   5   0    2672     699                                                        7303    7.93   -0.01  1.0000
  -3   5   0    2601     407                                                        7186    7.93   -0.01  1.0000
  -3   5  -1   13060     763                                                        9023   -4.48    0.01  1.0000
   3  -5   2     145     732                                                         277    1.06    0.00  1.0000
  -3   5  -2   22537    1187                                                       23934    1.06    0.00  1.0000
  -3   5  -3    3592     518                                                        3913   -0.62    0.00  1.0000
  -3   5  -4   24348    1086                                                       21550    2.15    0.00  1.0000
   3  -5   4   23494     613                                                       20746    2.15    0.00  1.0000
   3  -5   5   35584    1045                                                       40255   -2.80    0.00  1.0000
  -3   5  -5   34073    1415                                                       38646   -2.80    0.00  1.0000
  -3   5  -6     275     210                                                         134    1.60    0.00  1.0000
   3  -5   6     152     173                                                          48    1.60    0.00  1.0000
   3  -5   7   41983    1404                                                       42148    0.09    0.01  1.0000
  -3   5  -7   41527    1407                                                       41688    0.09   -0.01  1.0000
   3  -5   8     504    2027                                                         321   -1.05   -0.01  1.0000
   3  -5   8     938     328                                                         681   -1.05   -0.01  1.0000
   3  -5   9     593    2168                                                         331    1.44    0.00  1.0000
  -3   4  15     721     886                                                         712   -0.04    0.01  1.0000
  -3   4  14    2020     878                                                        2065   -0.11   -0.01  1.0000
  -3   4  13     340     649                                                         391    0.31    0.01  1.0000
  -3   4  12   13944    1542                                                       13741   -0.20   -0.01  1.0000
  -3   4  11    2567     785                                                        2752   -0.42    0.01  1.0000
  -3   4  10   11425    1218                                                       10328    1.23    0.00  1.0000
  -3   4   9   23715    1608                                                       21721   -1.54    0.00  1.0000
  -3   4   8   15662    1347                                                       16828    1.07    0.00  1.0000
  -3   4   8   14512    1051                                                       15636    1.07    0.00  1.0000
  -3   4   7    6473     707                                                        6852   -0.54    0.00  1.0000
  -3   4   7    6242     833                                                        6614   -0.54    0.00  1.0000
  -3   4   6   49977    1954                                                       48265    0.90    0.00  1.0000
  -3   4   6   50458    1743                                                       48738    0.90    0.00  1.0000
  -3   4   5    1701     435                                                        2350   -1.71    0.00  1.0000
  -3   4   5    1408     446                                                        2004   -1.71    0.00  1.0000
  -3   4   4    1818     415                                                        2097    0.75    0.01  1.0000
  -3   4   4    1271     383                                                        1506    0.75    0.01  1.0000
  -3   4   3   18393     918                                                       14289    3.74   -0.01  1.0000
  -3   4   3   17479     816                                                       13484    3.74   -0.01  1.0000
  -3   4   2   25167     868                                                       13198  -10.15    0.01  1.0000
  -3   4   2   21809     641                                                       10800  -10.15    0.01  1.0000
  -3   4   1   38517    1880                                                       65772   14.00   -0.01  1.0000
  -3   4   1   38513    1375                                                       65767   14.00   -0.01  1.0000
  -3   4   0   19492     437                                                        7424  -12.40    0.00  1.0000
  -3   4   0   20437     677                                                        8011  -12.40    0.00  1.0000
  -3   4  -1    5025     740                                                       10159    7.30    0.01  1.0000
   3  -4   1     991     382                                                        -107    7.30   -0.01  1.0000
  -3   4  -2    1368     272                                                         534   -3.22   -0.01  1.0000
  -3   4  -3   15762     944                                                       18228    2.21    0.01  1.0000
   3  -4   3     148     644                                                         465    2.21   -0.01  1.0000
  -3   4  -4     223     201                                                          41   -2.43    0.00  1.0000
  -3   4  -5   68902    1718                                                       65632    1.46    0.01  1.0000
   3  -4   5     159     965                                                          40    1.46   -0.01  1.0000
   3  -4   6       6     192                                                         -15    0.58    0.01  1.0000
  -3   4  -6      12     184                                                          29    0.58   -0.01  1.0000
  -3   4  -7    6338     481                                                        5037   -2.02    0.01  1.0000
   3  -4   7    7624     620                                                        6189   -2.02   -0.01  1.0000
   3  -4   8    1753     374                                                        1065    2.18    0.00  1.0000
   3  -4   9      63    2081                                                        -137   -1.84    0.01  1.0000
   3  -4   9      89     309                                                          99   -1.84    0.01  1.0000
   3  -4  10    3468     674                                                        4312    1.59   -0.01  1.0000
   3  -4  11      24    2645                                                       -2942   -1.13    0.01  1.0000
   3  -4  11    7138     872                                                        6342   -1.13    0.01  1.0000
   3  -4  16     310    1815                                                         241    0.49    0.00  1.0000
  -3   3  15     379     751                                                         404    0.17   -0.02  1.0000
  -3   3  14    4545    1077                                                        4405    0.25    0.01  1.0000
  -3   3  13       7     623                                                          -5   -0.62    0.00  1.0000
  -3   3  12    2635     919                                                        2921    0.64    0.00  1.0000
  -3   3  11    3316     899                                                        3546   -0.46    0.00  1.0000
  -3   3  10    8463    1096                                                        8015    0.57   -0.01  1.0000
  -3   3   9   25372    1668                                                       23847   -1.13    0.01  1.0000
  -3   3   8   13911     983                                                       15605    1.62   -0.01  1.0000
  -3   3   8   13925    1298                                                       15620    1.62   -0.01  1.0000
  -3   3   7   33149    1776                                                       35142   -1.26    0.01  1.0000
  -3   3   7   34794    1477                                                       36835   -1.26    0.01  1.0000
  -3   3   6    4400     650                                                        4408   -0.01    0.00  1.0000
  -3   3   6    4921     578                                                        4929   -0.01    0.00  1.0000
  -3   3   5   46034    1637                                                       47427    0.75    0.00  1.0000
  -3   3   5   46802    1793                                                       48206    0.75    0.00  1.0000
  -3   3   4     488     240                                                         299    1.22    0.00  1.0000
  -3   3   4     503     243                                                         310    1.22    0.00  1.0000
  -3   3   3   52386    1754                                                       65717   -6.39    0.00  1.0000
  -3   3   3   56762    1907                                                       70608   -6.39    0.00  1.0000
  -3   3   2   13838     430                                                        4405   11.90    0.00  1.0000
  -3   3   2   13809     511                                                        4389   11.90    0.00  1.0000
  -3   3   1   10143    1119                                                       25249  -13.55   -0.01  1.0000
  -3   3   1   10024     878                                                       25061  -13.55   -0.01  1.0000
   3  -3  -1   10204     562                                                       25347  -13.55    0.01  1.0000
  -3   3   0   36332    1027                                                       21699   10.06    0.01  1.0000
  -3   3   0   36094     760                                                       21515   10.06    0.01  1.0000
   3  -3   0   38516     594                                                       23396   10.06   -0.01  1.0000
  -3   3  -1     476     316                                                        1602   -4.56   -0.01  1.0000
   3  -3   1     687     228                                                        1982   -4.56    0.01  1.0000
  -3   3  -2   51582    1567                                                       53688    1.07    0.01  1.0000
   3  -3   2   51940    1273                                                       54052    1.07   -0.01  1.0000
   3  -3   3   25928    1006                                                       25476   -0.33    0.00  1.0000
  -3   3  -3   25370    1056                                                       24923   -0.33    0.00  1.0000
  -3   3  -4    3080     392                                                        3093   -0.03    0.00  1.0000
   3  -3   4    3317     447                                                        3331   -0.03    0.00  1.0000
  -3   3  -5   35904    1168                                                       33139    1.73    0.00  1.0000
   3  -3   5      56     721                                                          -6    1.73    0.00  1.0000
  -3   3  -6   12230     607                                                        8878   -3.82   -0.01  1.0000
  -3   3  -7   30099    1095                                                       37140    4.47    0.01  1.0000
   3  -3   7   11039    2737                                                       15447    4.47   -0.01  1.0000
   3  -3   8    1454     533                                                        2776   -3.42    0.01  1.0000
   3  -3   9     825    1799                                                         420    1.91   -0.01  1.0000
   3  -3   9    3626     577                                                        2704    1.91   -0.01  1.0000
   3  -3  10    1902     580                                                        2248   -0.89    0.00  1.0000
   3  -3  10      15    2138                                                        -250   -0.89    0.00  1.0000
   3  -3  11    1139     518                                                        1069    0.25    0.00  1.0000
   3  -3  12       1    2588                                                        -997    0.28    0.00  1.0000
   3  -3  12    2466     712                                                        2348    0.28    0.00  1.0000
   3  -3  13    2944     777                                                        2713   -0.51    0.00  1.0000
   3  -3  14   12077    1420                                                       12270    0.20    0.00  1.0000
   3  -3  15       2    2091                                                        -197    0.32    0.01  1.0000
  -3   2  15    5071    1263                                                        4993    0.13    0.00  1.0000
  -3   2  14     123     749                                                          60   -0.77    0.01  1.0000
  -3   2  13   16804    1790                                                       18190    1.23   -0.01  1.0000
  -3   2  12     523     566                                                         286   -1.49    0.01  1.0000
  -3   2  11    7176    1013                                                        5844    1.98    0.00  1.0000
  -3   2  10   14099    1509                                                       17065   -2.77    0.01  1.0000
  -3   2   9    4281     935                                                        6213    3.19   -0.01  1.0000
  -3   2   8   45146    2011                                                       40856   -2.41    0.01  1.0000
  -3   2   8   42510    1476                                                       38350   -2.41    0.01  1.0000
  -3   2   7     604     269                                                         541    0.31    0.00  1.0000
  -3   2   7     697     392                                                         630    0.31    0.00  1.0000
  -3   2   6    2279     343                                                        1491    2.12   -0.01  1.0000
  -3   2   6    2546     456                                                        1708    2.12   -0.01  1.0000
  -3   2   5   15873    1032                                                       19486   -3.16    0.01  1.0000
  -3   2   5   14662    1085                                                       18142   -3.16    0.01  1.0000
  -3   2   4    4099     479                                                        3368    1.42   -0.01  1.0000
  -3   2   4    3965     449                                                        3246    1.42   -0.01  1.0000
  -3   2   3     335     242                                                         294    2.50    0.01  1.0000
  -3   2   3     202     206                                                         136    2.50    0.01  1.0000
  -3   2   2    4630     360                                                        2080   -5.75   -0.01  1.0000
  -3   2   2    4621     327                                                        2074   -5.75   -0.01  1.0000
   3  -2  -2    4781     258                                                        2188   -5.75    0.01  1.0000
   3  -2  -1  167109    2106                                                      187080    5.52   -0.01  1.0000
  -3   2   1  166931    2928                                                      186895    5.52    0.01  1.0000
  -3   2   1  170371    2566                                                      190534    5.52    0.01  1.0000
   3  -2   0  141900    1904                                                      148808   -2.11    0.00  1.0000
  -3   2   0  127463    2464                                                      134015   -2.11    0.00  1.0000
   3  -2   1  213443    2537                                                      218569   -1.28    0.00  1.0000
  -3   2  -1  213396    3098                                                      218523   -1.28    0.00  1.0000
   3  -2   2   88196    1834                                                       93830    2.17    0.00  1.0000
  -3   2  -2   92674    2049                                                       98447    2.17    0.00  1.0000
  -3   2  -3   59442    1530                                                       56467   -1.44    0.00  1.0000
   3  -2   3   58833    1568                                                       55875   -1.44    0.00  1.0000
   3  -2   4   28719    1280                                                       31263    1.70    0.00  1.0000
  -3   2  -4   27328    1084                                                       29811    1.70    0.00  1.0000
   3  -2   5   15831    1112                                                       20156   -3.75    0.01  1.0000
  -3   2  -5   17095     913                                                       21581   -3.75   -0.01  1.0000
   3  -2   6   27685    1218                                                       20145    5.67   -0.01  1.0000
  -3   2  -6   28227     839                                                       20608    5.67    0.01  1.0000
  -3   2  -7   11096     706                                                       16577   -5.45    0.00  1.0000
   3  -2   7   12505    1273                                                       18289   -5.45    0.00  1.0000
   3  -2   9   67659    2384                                                       65459   -0.99   -0.02  1.0000
   3  -2  10   35973    1908                                                       35777   -0.12    0.01  1.0000
   3  -2  11    6856     948                                                        6683    0.25   -0.01  1.0000
   3  -2  11     109    1973                                                          88    0.25   -0.01  1.0000
   3  -2  12   22348    1692                                                       22518   -0.13    0.01  1.0000
   3  -2  13    1705     718                                                        1680    0.07   -0.01  1.0000
   3  -2  14    9779    1312                                                        9824    0.05    0.01  1.0000
   3  -2  15    3125     942                                                        3017   -0.23   -0.01  1.0000
  -3   1  16    2433    1000                                                        2397   -0.09    0.00  1.0000
  -3   1  15   13198    1705                                                       13614   -0.42    0.01  1.0000
  -3   1  14   18691    1824                                                       17570    0.97   -0.01  1.0000
  -3   1  13    6704    1096                                                        5785   -1.37    0.00  1.0000
  -3   1  12   15868    1658                                                       18006    1.91    0.00  1.0000
  -3   1  11     968     600                                                        1876   -2.83    0.00  1.0000
  -3   1  11    1035     726                                                        1969   -2.83    0.00  1.0000
  -3   1  10    1871     562                                                         802    3.46    0.00  1.0000
  -3   1  10    1707     438                                                         696    3.46    0.00  1.0000
  -3   1   9     136     419                                                         -19   -2.70    0.00  1.0000
  -3   1   9     339     311                                                          53   -2.70    0.00  1.0000
  -3   1   8   23871    1135                                                       23678    0.14    0.01  1.0000
  -3   1   8   24963    1540                                                       24767    0.14    0.01  1.0000
  -3   1   7     213     214                                                         -12    3.39   -0.01  1.0000
  -3   1   7     210     412                                                         420    3.39   -0.01  1.0000
  -3   1   6  323770    4642                                                      293065   -6.43    0.01  1.0000
  -3   1   6  312635    3767                                                      282476   -6.43    0.01  1.0000
  -3   1   5  193632    3763                                                      223792    7.68    0.00  1.0000
  -3   1   5  186809    3292                                                      216452    7.68    0.00  1.0000
  -3   1   4  166433    3225                                                      190811   -6.71    0.00  1.0000
  -3   1   4  165341    3048                                                      189642   -6.71    0.00  1.0000
  -3   1   3  248607    3306                                                      229670    4.50    0.00  1.0000
  -3   1   3  248727    3323                                                      229785    4.50    0.00  1.0000
  -3   1   2   45608    1355                                                       40276   -2.99    0.00  1.0000
   3  -1  -2   48656    1216                                                       43143   -2.99    0.00  1.0000
  -3   1   2   46228    1393                                                       40859   -2.99    0.00  1.0000
  -3   1   1  109153    2322                                                      118481    3.22    0.01  1.0000
   3  -1  -1  109058    1977                                                      118379    3.22   -0.01  1.0000
  -3   1   0   59663    1517                                                       51474   -4.03   -0.01  1.0000
   3  -1   0   59329    1285                                                       51164   -4.03    0.01  1.0000
  -3   1  -1    1857     415                                                        3325    3.38    0.01  1.0000
   3  -1   1    1865     389                                                        3336    3.38   -0.01  1.0000
   3  -1   2     530     227                                                         344   -1.04    0.01  1.0000
  -3   1  -2     271     193                                                         143   -1.04   -0.01  1.0000
  -3   1  -3   86619    1929                                                       88526   -0.75    0.00  1.0000
   3  -1   3   86294    2090                                                       88198   -0.75    0.00  1.0000
  -3   1  -4    3215     392                                                        3254   -0.08    0.00  1.0000
   3  -1   4    3875     524                                                        3917   -0.08    0.00  1.0000
   3  -1   5  149826    3209                                                      159332    2.81    0.00  1.0000
  -3   1  -5  143183    2418                                                      152481    2.81    0.00  1.0000
   3  -1   6  239453    4000                                                      220392   -4.62    0.00  1.0000
   3  -1   6     397     642                                                         -16   -4.62    0.00  1.0000
   3  -1   7   16354    1060                                                       12507    3.75    0.02  1.0000
   3  -1   8  188396    4223                                                      192898   -1.20   -0.03  1.0000
   3  -1   9       9    1178                                                          -2   -0.71    0.03  1.0000
   3  -1  10    9084    1084                                                        9834    0.91   -0.02  1.0000
   3  -1  11    5688     936                                                        5574   -0.18    0.01  1.0000
   3  -1  11       1    2056                                                        -717   -0.18    0.01  1.0000
   3  -1  12    2024     705                                                        1909   -0.30    0.00  1.0000
   3  -1  13       1     571                                                        -146    0.24    0.00  1.0000
   3  -1  13     121    2500                                                         145    0.24    0.00  1.0000
   3  -1  14    6898    1171                                                        6922   -0.03    0.00  1.0000
   3  -1  15    3170    1012                                                        3180   -0.02    0.00  1.0000
  -3   0  16    4328    1224                                                        4410    0.14    0.00  1.0000
  -3   0  15     711     713                                                         728    0.07    0.00  1.0000
  -3   0  14    1140     802                                                        1048   -0.32   -0.01  1.0000
  -3   0  13    4232     967                                                        3825    0.74    0.01  1.0000
  -3   0  12   38479    2256                                                       41222   -1.60   -0.01  1.0000
  -3   0  12   32022    2277                                                       34528   -1.60   -0.01  1.0000
  -3   0  11    6695    1172                                                        8630    2.58    0.00  1.0000
  -3   0  11    6891    1081                                                        8853    2.58    0.00  1.0000
  -3   0  10   41767    1906                                                       37364   -2.59    0.00  1.0000
  -3   0  10   41827    2138                                                       37421   -2.59    0.00  1.0000
  -3   0   9   34648    1988                                                       35846    0.75    0.01  1.0000
  -3   0   9   38727    1851                                                       39992    0.75    0.01  1.0000
  -3   0   8   58671    2268                                                       53353    2.62   -0.01  1.0000
  -3   0   8   57817    1665                                                       52539    2.62   -0.01  1.0000
  -3   0   7  149604    3778                                                      170773   -6.15    0.00  1.0000
  -3   0   7  149246    2965                                                      170390   -6.15    0.00  1.0000
  -3   0   6    3598     394                                                         611    8.59    0.01  1.0000
  -3   0   6    3866     282                                                         730    8.59    0.01  1.0000
  -3   0   5  179457    2755                                                      146720   -9.43   -0.01  1.0000
  -3   0   5  176371    3056                                                      143931   -9.43   -0.01  1.0000
  -3   0   4  195015    3668                                                      230544    8.94    0.01  1.0000
  -3   0   4  195621    3419                                                      231203    8.94    0.01  1.0000
   3   0  -3    8135     422                                                        3145   -7.93    0.01  1.0000
  -3   0   3    8259     472                                                        3222   -7.93   -0.01  1.0000
  -3   0   3    7737     433                                                        2899   -7.93   -0.01  1.0000
   3   0  -2   20179     775                                                       12544    6.97   -0.01  1.0000
  -3   0   2   18895     780                                                       11536    6.97    0.01  1.0000
  -3   0   2   19290     797                                                       11845    6.97    0.01  1.0000
  -3   0   1  124141    2614                                                      142158   -5.74   -0.01  1.0000
   3   0  -1  137922    2615                                                      156876   -5.74    0.01  1.0000
  -3   0   0   40644    1301                                                       35268    3.22    0.01  1.0000
   3   0   0   42155    1261                                                       36679    3.22   -0.01  1.0000
   3   0   1   63100    1732                                                       64633    0.71    0.00  1.0000
  -3   0  -1   61604    1713                                                       63118    0.71    0.00  1.0000
   3   0   2  561742    5148                                                      534685   -4.24    0.01  1.0000
  -3   0  -2  547156    4905                                                      520454   -4.24   -0.01  1.0000
   3   0   3   19228     917                                                       13718    5.02   -0.01  1.0000
   3   0   4  293018    4353                                                      305414   -2.64    0.01  1.0000
   3   0   5    2767     539                                                        3047   -0.60    0.00  1.0000
   3   0   6   28170    1580                                                       30936    1.87    0.01  1.0000
   3   0   7   41196    1886                                                       40142   -0.61   -0.02  1.0000
   3   0   8      32     738                                                         -78   -1.31    0.03  1.0000
   3   0   8   11657    1063                                                       10475   -1.31    0.03  1.0000
   3   0   9     418     510                                                         797    1.84   -0.02  1.0000
   3   0  11   45653    2412                                                       46103   -0.24    0.00  1.0000
   3   0  12    6524    1139                                                        6934    0.58   -0.01  1.0000
   3   0  13   38798    2439                                                       38295   -0.30    0.01  1.0000
   3   0  14     251     724                                                         253   -0.02   -0.01  1.0000
   3   0  15    9119    1422                                                        9023    0.12    0.01  1.0000
  -3  -1  16    2245    1031                                                        2513   -0.66    0.01  1.0000
  -3  -1  15     227     779                                                         135    0.83   -0.01  1.0000
  -3  -1  14   25222    2134                                                       24347   -0.65    0.01  1.0000
  -3  -1  13   25800    2113                                                       25722   -0.06   -0.01  1.0000
  -3  -1  13   27662    2045                                                       27581   -0.06   -0.01  1.0000
  -3  -1  12   26987    2002                                                       25335    1.19    0.00  1.0000
  -3  -1  12   29806    1966                                                       28069    1.19    0.00  1.0000
  -3  -1  11   43549    2525                                                       47304   -2.05    0.01  1.0000
  -3  -1  11   47567    2521                                                       51488   -2.05    0.01  1.0000
  -3  -1  10    3421     681                                                        2625    1.68    0.00  1.0000
  -3  -1  10    3030     694                                                        2284    1.68    0.00  1.0000
  -3  -1   9   19950    1516                                                       20235    0.23    0.00  1.0000
  -3  -1   9   22611    1508                                                       22915    0.23    0.00  1.0000
  -3  -1   8      69     397                                                         249   -2.92    0.00  1.0000
  -3  -1   8     132     687                                                         403   -2.92    0.00  1.0000
  -3  -1   7    1875     683                                                        4263    5.12    0.01  1.0000
  -3  -1   6    2294     375                                                         599   -6.17   -0.02  1.0000
  -3  -1   5  131418    2797                                                      112446    6.32    0.02  1.0000
  -3  -1   4   48336    1998                                                       60762   -6.21   -0.01  1.0000
   3   1  -3  283242    4149                                                      311912    6.10    0.00  1.0000
  -3  -1   3  280617    4242                                                      309157    6.10    0.00  1.0000
   3   1  -2  125417    2412                                                      109635   -5.37    0.00  1.0000
   3   1  -1   39940    1369                                                       35000    2.97    0.00  1.0000
   3   1   0  162650    2884                                                      158610    1.17   -0.01  1.0000
   3   1   1  135136    2874                                                      152625   -5.35    0.01  1.0000
   3   1   2    1736     609                                                        5110    7.14   -0.01  1.0000
   3   1   3   60273    1784                                                       48999   -5.60    0.01  1.0000
   3   1   4      39     277                                                         234    2.34   -0.01  1.0000
   3   1   5    5178     708                                                        5133   -0.07    0.00  1.0000
   3   1   6    6125     789                                                        6031    0.14    0.00  1.0000
   3   1   7   54296    2328                                                       57337   -1.50    0.01  1.0000
   3   1   8    9456    1137                                                       11375    2.19    0.00  1.0000
   3   1   9     602     973                                                         339   -1.44    0.00  1.0000
   3   1   9   38911    2032                                                       36532   -1.44    0.00  1.0000
   3   1  10    9282    1171                                                        9378    0.12    0.01  1.0000
   3   1  11   50152    2524                                                       48926    0.64   -0.01  1.0000
   3   1  12    5810    1129                                                        6238   -0.64    0.01  1.0000
   3   1  13    3110     953                                                        3286    0.37   -0.01  1.0000
   3   1  14     173     724                                                         190   -0.15    0.00  1.0000
  -3  -2  16    3245    1110                                                        2690    1.19   -0.01  1.0000
  -3  -2  15    6942    1395                                                        8009   -1.44    0.01  1.0000
  -3  -2  14      19     740                                                         -73    1.00    0.00  1.0000
  -3  -2  14      54     669                                                         133    1.00    0.00  1.0000
  -3  -2  13    6554    1180                                                        6562    0.01   -0.01  1.0000
  -3  -2  13    7850    1277                                                        7859    0.01   -0.01  1.0000
  -3  -2  12    4695     944                                                        4040   -1.15    0.02  1.0000
  -3  -2  12    8077    1153                                                        7210   -1.15    0.02  1.0000
  -3  -2  11    1192     760                                                        1775    1.77   -0.01  1.0000
  -3  -2  11    1772     782                                                        2469    1.77   -0.01  1.0000
  -3  -2  10   39259    2148                                                       36909   -1.40    0.00  1.0000
  -3  -2  10   37442    2092                                                       35148   -1.40    0.00  1.0000
  -3  -2   9   26997    1743                                                       26753    0.17    0.00  1.0000
  -3  -2   9   25327    1668                                                       25091    0.17    0.00  1.0000
  -3  -2   8   64883    2450                                                       62352    1.17    0.00  1.0000
  -3  -2   8   70481    2553                                                       67842    1.17    0.00  1.0000
  -3  -2   7    6300     745                                                        5105   -1.86    0.00  1.0000
  -3  -2   6   19296    1378                                                       21524    1.83    0.00  1.0000
  -3  -2   5    4727     729                                                        5851   -1.80    0.00  1.0000
   3   2  -4  217033    3795                                                      207231    2.47    0.01  1.0000
  -3  -2   4  219837    3792                                                      209974    2.47   -0.01  1.0000
   3   2  -3   13470     860                                                       10263   -3.43   -0.01  1.0000
   3   2  -2  136554    3065                                                      146997    3.22    0.01  1.0000
   3   2  -1    6284     712                                                        6934   -0.93   -0.01  1.0000
   3   2   0    9465     744                                                        7573   -2.38    0.01  1.0000
   3   2   1  232898    4062                                                      251128    4.30    0.00  1.0000
   3   2   2   55191    2061                                                       62366   -3.44    0.00  1.0000
   3   2   3   92644    2546                                                       90364    0.88    0.00  1.0000
   3   2   4   11336     952                                                       10489    0.94    0.00  1.0000
   3   2   5   30485    1607                                                       29492   -0.67    0.01  1.0000
   3   2   6    2332     629                                                        2705   -0.86   -0.01  1.0000
   3   2   7   89069    2872                                                       84343    1.87    0.01  1.0000
   3   2   8   38704    2008                                                       36230   -1.48   -0.01  1.0000
   3   2   8      41     739                                                         -41   -1.48   -0.01  1.0000
   3   2   9    4721     898                                                        4942    0.37    0.00  1.0000
   3   2  10     163     545                                                         125    0.41    0.00  1.0000
   3   2  11       6     552                                                          -1   -0.57    0.00  1.0000
   3   2  12    2355     869                                                        2574    0.52    0.00  1.0000
   3   2  13     242     739                                                         183   -0.49   -0.01  1.0000
   3   2  14   11835    1620                                                       11500    0.36    0.01  1.0000
  -3  -3  16     491     902                                                         744   -1.21    0.00  1.0000
  -3  -3  15      28     828                                                        -107    1.22    0.00  1.0000
  -3  -3  15     488     749                                                         284    1.22    0.00  1.0000
  -3  -3  14    1483     850                                                        1310   -0.54   -0.01  1.0000
  -3  -3  14    1911     857                                                        1714   -0.54   -0.01  1.0000
  -3  -3  13     295     669                                                         354   -0.38    0.01  1.0000
  -3  -3  13      21     585                                                          39   -0.38    0.01  1.0000
  -3  -3  12    2950     842                                                        2494    1.04   -0.01  1.0000
  -3  -3  12    3460     836                                                        2963    1.04   -0.01  1.0000
  -3  -3  11    4263    1020                                                        4962   -1.20    0.00  1.0000
  -3  -3  11    3310     876                                                        3929   -1.20    0.00  1.0000
  -3  -3  10   36840    2268                                                       38330    0.89    0.01  1.0000
  -3  -3  10   35328    2142                                                       36788    0.89    0.01  1.0000
  -3  -3   9     241     467                                                         203   -0.39   -0.01  1.0000
  -3  -3   9     295     460                                                         253   -0.39   -0.01  1.0000
  -3  -3   8    8344     997                                                        8272    0.09    0.01  1.0000
  -3  -3   7   14201    1207                                                       13954   -0.24   -0.01  1.0000
  -3  -3   6    6428     853                                                        6785    0.51    0.01  1.0000
   3   3  -5   27331    1552                                                       27409   -0.06    0.01  1.0000
  -3  -3   5   29167    1559                                                       29249   -0.06   -0.01  1.0000
   3   3  -4   21955    1429                                                       23910   -1.50    0.00  1.0000
   3   3  -3   40156    1909                                                       45841    3.19    0.00  1.0000
   3   3  -2    2540     638                                                        4247   -3.45    0.00  1.0000
   3   3  -1   18196    1123                                                       15920    2.03    0.00  1.0000
   3   3   0    6059     749                                                        6507   -0.66    0.01  1.0000
   3   3   1   10602     948                                                       11564    1.07   -0.01  1.0000
   3   3   2    5456     614                                                        3773   -2.89    0.01  1.0000
   3   3   3    1048     543                                                        2287    3.95   -0.01  1.0000
   3   3   4   20123    1246                                                       16882   -2.78    0.00  1.0000
   3   3   5   20843    1434                                                       21094    0.20    0.00  1.0000
   3   3   6   14539    1193                                                       12815    1.72    0.01  1.0000
   3   3   7   36579    2079                                                       39772   -1.90    0.00  1.0000
   3   3   8      37     509                                                          48    1.00    0.00  1.0000
   3   3   9   10422    1256                                                       10208   -0.25    0.01  1.0000
   3   3  10    1573     763                                                        1554    0.06   -0.01  1.0000
   3   3  11      13     538                                                          13    0.01    0.01  1.0000
   3   3  12    3918    1060                                                        3772   -0.27   -0.01  1.0000
   3   3  12    4155    1036                                                        4004   -0.27   -0.01  1.0000
   3   3  13       4     815                                                         -18    0.48    0.01  1.0000
  -3  -4  16     283     866                                                         189    0.72    0.00  1.0000
  -3  -4  16      10     866                                                        -208    0.72    0.00  1.0000
  -3  -4  15     136     858                                                         191   -0.50    0.00  1.0000
  -3  -4  15     376     776                                                         464   -0.50    0.00  1.0000
  -3  -4  14    1945     947                                                        1980   -0.09    0.00  1.0000
  -3  -4  14    2418     890                                                        2458   -0.09    0.00  1.0000
  -3  -4  13    4825    1234                                                        4546    0.48    0.00  1.0000
  -3  -4  13    5617    1102                                                        5314    0.48    0.00  1.0000
  -3  -4  12     541     713                                                         468   -0.38    0.00  1.0000
  -3  -4  12     371     574                                                         311   -0.38    0.00  1.0000
  -3  -4  11    5638    1041                                                        5659    0.03    0.01  1.0000
  -3  -4  11    5494    1103                                                        5516    0.03    0.01  1.0000
  -3  -4  10    4290     903                                                        4400    0.19   -0.01  1.0000
  -3  -4  10    4647     984                                                        4762    0.19   -0.01  1.0000
  -3  -4   9    8262    1102                                                        8382   -0.16    0.01  1.0000
  -3  -4   8   14302    1315                                                       14428   -0.12    0.00  1.0000
  -3  -4   7   14302    1257                                                       14807    0.49    0.00  1.0000
  -3  -4   6   25305    1549                                                       24629   -0.50    0.00  1.0000
   3   4  -5    6044     852                                                        6324   -0.41    0.01  1.0000
   3   4  -4   14854    1134                                                       12691    2.14   -0.01  1.0000
   3   4  -3   11737    1207                                                       15320   -3.58    0.01  1.0000
   3   4  -2   22269    1279                                                       17716    3.75   -0.01  1.0000
   3   4  -1   11562    1158                                                       14665   -3.15    0.01  1.0000
   3   4   0   44137    2038                                                       50241    3.27   -0.01  1.0000
   3   4   1   54296    1960                                                       45708   -4.47    0.01  1.0000
   3   4   2   29593    1430                                                       22423    5.20   -0.01  1.0000
   3   4   3   75567    2786                                                       84766   -3.78    0.00  1.0000
   3   4   4    6849     901                                                        7264    0.58    0.01  1.0000
   3   4   5   27665    1789                                                       31040    2.30    0.00  1.0000
   3   4   6    2185     743                                                        3671   -3.21    0.00  1.0000
   3   4   7     819     505                                                         337    2.49   -0.01  1.0000
   3   4   8    2784     832                                                        3519   -1.52    0.01  1.0000
   3   4   9    3390     820                                                        2861    1.11   -0.01  1.0000
   3   4  10    4868    1040                                                        5426   -0.91    0.01  1.0000
   3   4  11   10757    1407                                                       11159    0.45    0.00  1.0000
   3   4  12   15774    1746                                                       15900    0.12    0.00  1.0000
   3   4  12   14076    1644                                                       14195    0.12    0.00  1.0000
  -3  -5  16    1618    1213                                                        1553   -0.19    0.01  1.0000
  -3  -5  15   12301    1755                                                       12196   -0.11   -0.01  1.0000
  -3  -5  15    8116    1658                                                        8030   -0.11   -0.01  1.0000
  -3  -5  14     653     866                                                         743    0.40    0.01  1.0000
  -3  -5  14     716     798                                                         810    0.40    0.01  1.0000
  -3  -5  13   13263    1642                                                       13465   -0.20   -0.01  1.0000
  -3  -5  13   13877    1801                                                       14084   -0.20   -0.01  1.0000
  -3  -5  12   23883    2114                                                       24467   -0.44    0.01  1.0000
  -3  -5  12   22564    2033                                                       23133   -0.44    0.01  1.0000
  -3  -5  11      17     760                                                        -406    0.95    0.00  1.0000
  -3  -5  11     114     596                                                         151    0.95    0.00  1.0000
  -3  -5  10    8440    1133                                                        7765   -0.88   -0.01  1.0000
  -3  -5   9     100     485                                                         127    0.32    0.01  1.0000
  -3  -5   8     197     485                                                         165    0.28   -0.01  1.0000
   3   5  -6   17422    1483                                                       17049    0.33    0.01  1.0000
   3   5  -5    5151     898                                                        5452    0.48   -0.01  1.0000
   3   5  -4  133964    3739                                                      129397   -1.46    0.01  1.0000
   3   5  -3   33476    1964                                                       36615    1.95   -0.01  1.0000
   3   5  -2   60459    2547                                                       64395   -1.83    0.00  1.0000
   3   5  -1  141529    3648                                                      135554    1.87    0.00  1.0000
   3   5   0    9511    1099                                                       11865   -2.65    0.00  1.0000
   3   5   1    7162    1028                                                        9815    3.40    0.00  1.0000
   3   5   2    8792     903                                                        6794   -2.64   -0.01  1.0000
   3   5   3      88     408                                                          89    0.02    0.01  1.0000
   3   5   4    1840     504                                                         922    2.91   -0.01  1.0000
   3   5   5   11230    1363                                                       15484   -4.31    0.00  1.0000
   3   5   6    4477     734                                                        2574    3.85    0.00  1.0000
   3   5   7   25056    1669                                                       21514   -2.71    0.00  1.0000
   3   5   8   26931    2016                                                       29738    1.95    0.00  1.0000
   3   5   9    7641    1317                                                        8860   -1.56    0.00  1.0000
   3   5  10   44889    2606                                                       43061    1.02    0.01  1.0000
   3   5  11    1412     799                                                        1503   -0.28   -0.01  1.0000
   3   5  12    3568     981                                                        3474   -0.19    0.01  1.0000
   3   5  12    3330    1077                                                        3239   -0.19    0.01  1.0000
  -3  -6  12     636     693                                                         483    0.75    0.01  1.0000
  -3  -6  11    2538     890                                                        3006   -1.04   -0.01  1.0000
  -3  -6  10   13743    1431                                                       13235    0.51    0.02  1.0000
   3   6  -8   39468    2350                                                       37710   -1.04   -0.01  1.0000
   3   6  -7   11316    1365                                                       12335    1.10    0.01  1.0000
   3   6  -6   26801    1957                                                       27949   -0.81    0.00  1.0000
   3   6  -5   98778    3541                                                       97318    0.54    0.00  1.0000
   3   6  -4     209     498                                                         280   -0.54    0.01  1.0000
   3   6  -3   71178    2900                                                       72864    0.73   -0.01  1.0000
   3   6  -2   32492    1902                                                       31409   -0.70    0.01  1.0000
   3   6  -1   16549    1420                                                       16616    0.06    0.00  1.0000
   3   6   0   10296    1080                                                        9564    0.85    0.00  1.0000
   3   6   1   47336    2309                                                       49177   -0.97   -0.01  1.0000
   3   6   2    4220     808                                                        4416   -0.35    0.01  1.0000
   3   6   3   19552    1630                                                       22558    2.42    0.00  1.0000
   3   6   4   67483    2645                                                       59397   -3.74    0.00  1.0000
   3   6   5    2862     602                                                        1456    3.59    0.01  1.0000
   3   6   6   59672    2874                                                       65184   -2.57   -0.01  1.0000
   3   6   7    2864     740                                                        2121    1.74    0.01  1.0000
   3   6   8    8422    1183                                                        7387   -1.36   -0.01  1.0000
   3   6   9    9285    1343                                                       10115    0.98    0.01  1.0000
   3   6  10     614     703                                                         544   -0.34   -0.01  1.0000
   3   6  11     200     719                                                         175   -0.21    0.00  1.0000
   3   7  -9   16730    1815                                                       17845   -0.99    0.00  1.0000
   3   7  -8      31     660                                                        -135    1.30    0.00  1.0000
   3   7  -7    4256     928                                                        3663   -1.11    0.00  1.0000
   3   7  -6    6363    1153                                                        7069    1.00   -0.01  1.0000
   3   7  -5   19235    1611                                                       17689   -1.32    0.02  1.0000
   3   7  -4    7407    1020                                                        6119    1.82   -0.02  1.0000
   3   7  -3   80605    3352                                                       85441   -1.95    0.01  1.0000
   3   7  -2      35     522                                                        -112    1.37    0.01  1.0000
   3   7  -1   47721    2416                                                       47089   -0.34   -0.02  1.0000
   3   7   0   30186    1895                                                       29612   -0.39    0.01  1.0000
   3   7   1    1711     627                                                        1655    0.16   -0.01  1.0000
   3   7   2   29712    1912                                                       28465    0.85    0.01  1.0000
   3   7   3    3111     882                                                        4001   -1.74   -0.01  1.0000
   3   7   4     586     663                                                         983    1.76    0.01  1.0000
   3   7   5   11816    1305                                                       10832   -1.07   -0.01  1.0000
   3   7   6    9693    1270                                                       10079    0.45    0.00  1.0000
   3   7   7       2     639                                                        -248   -0.33    0.00  1.0000
   3   7   8    9631    1312                                                        9289    0.41    0.00  1.0000
   3   7   9    3504     984                                                        3612   -0.22    0.00  1.0000
   3   7  10     644     744                                                         604   -0.19   -0.01  1.0000
   3   8 -11    5816    1301                                                        5530   -0.44   -0.01  1.0000
   3   8 -10    6137    1342                                                        6058   -0.12    0.01  1.0000
   3   8  -9    1212     830                                                        1387    0.57   -0.01  1.0000
   3   8  -8       6     700                                                        -275   -0.55    0.00  1.0000
   3   8  -7    4900    1086                                                        4653    0.42    0.00  1.0000
   3   8  -6   15851    1712                                                       16610   -0.69    0.01  1.0000
   3   8  -5    2154     896                                                        2713    1.35   -0.02  1.0000
   3   8  -4   47906    2629                                                       44640   -1.77    0.00  1.0000
   3   8  -3    4050     870                                                        3299    1.44    0.02  1.0000
   3   8  -2    8611    1242                                                        9005   -0.49   -0.04  1.0000
   3   8  -1    1605     715                                                        1762   -0.45    0.04  1.0000
   3   8   0     740     575                                                         929    0.78   -0.02  1.0000
   3   8   1    2037     732                                                        1864   -0.46    0.01  1.0000
   3   8   2     260     547                                                         260    0.00   -0.01  1.0000
   3   8   3    4691     938                                                        4717    0.04    0.01  1.0000
   3   8   4    3417     891                                                        3226    0.39    0.00  1.0000
   3   8   5   10314    1352                                                       11045   -0.83    0.00  1.0000
   3   8   6      12     592                                                        -129    0.79    0.00  1.0000
   3   8   7    8457    1266                                                        8204   -0.32    0.00  1.0000
   3   8   8     104     662                                                          98   -0.07    0.01  1.0000
   3   8   9    3120     951                                                        3087    0.07   -0.01  1.0000
   3   8  10       0     703                                                         -91    0.12    0.01  1.0000
   3   9 -12     768     888                                                         649   -0.53   -0.01  1.0000
   3   9 -11    1161     873                                                        1004    0.56    0.01  1.0000
   3   9 -10    6751    1463                                                        6992   -0.34   -0.01  1.0000
   3   9  -9    3783    1148                                                        3896    0.21   -0.01  1.0000
   3   9  -8    6531    1353                                                        6379   -0.22    0.01  1.0000
   3   9  -7       0     637                                                        -299    0.01   -0.01  1.0000
   3   9  -6    1765     897                                                        1988    0.60    0.00  1.0000
   3   9  -5     919     748                                                        1272   -1.24    0.00  1.0000
   3   9  -4      11     690                                                          79    1.31    0.02  1.0000
   3   9  -3     654     645                                                         813   -0.68   -0.04  1.0000
   3   9  -2     179     566                                                         161   -0.17    0.05  1.0000
   3   9  -1    4638     975                                                        5026    0.65   -0.03  1.0000
   3   9   0     126     527                                                         184   -0.62    0.01  1.0000
   3   9   1    3890     938                                                        3676    0.41    0.00  1.0000
   3   9   2     782     710                                                         885   -0.41    0.00  1.0000
   3   9   3    1985     841                                                        2274    0.74    0.01  1.0000
   3   9   4      24     669                                                         -27   -1.14   -0.01  1.0000
   3   9   5    1558     713                                                        1171    1.23    0.01  1.0000
   3   9   6     237     680                                                         143   -0.80   -0.01  1.0000
   3   9   7    1452     823                                                        1499    0.14    0.00  1.0000
   3   9   8     718     793                                                         655    0.28    0.00  1.0000
   3  10 -11       6     975                                                         -89   -0.56    0.00  1.0000
   3  10 -10    2181    1078                                                        2401    0.53   -0.01  1.0000
   3  10  -9     734     917                                                         630   -0.48    0.02  1.0000
   3  10  -8     510     883                                                         569    0.30   -0.02  1.0000
   3  10  -7    1324     867                                                        1272    0.17    0.01  1.0000
   3  10  -6    2880    1096                                                        3262   -0.80    0.00  1.0000
   3  10  -5    3652    1169                                                        4287    1.17    0.01  1.0000
   3  10  -4     190     706                                                         109   -0.95   -0.02  1.0000
   3  10  -3     320     676                                                         375    0.34    0.03  1.0000
   3  10  -2       0     628                                                         -25    0.14   -0.02  1.0000
   3  10  -1    1011     717                                                        1067   -0.20    0.00  1.0000
   3  10   0     137     690                                                         132    0.04    0.01  1.0000
   3  10   1     982     768                                                         972   -0.04   -0.02  1.0000
   3  10   2    6336    1182                                                        6551    0.31    0.01  1.0000
   3  10   3     473     673                                                         360   -0.70   -0.01  1.0000
   3  10   4     423     721                                                         278    0.93    0.00  1.0000
   3  10   5    3765    1078                                                        4196   -0.80    0.00  1.0000
   3  10   6       2     758                                                         -71    0.32    0.00  1.0000
   3  10   7     576     839                                                         614    0.19    0.00  1.0000
   3  11 -10    2825    1184                                                        2993   -0.36    0.01  1.0000
   3  11  -9     298     989                                                         343    0.30   -0.01  1.0000
   3  11  -8    2644    1163                                                        2606   -0.09    0.00  1.0000
   3  11  -7    4411    1297                                                        4239   -0.31    0.01  1.0000
   3  11  -6      92     751                                                          43    0.71   -0.01  1.0000
   3  11  -5    1527     895                                                        1809   -0.81    0.01  1.0000
   3  11  -4    6038    1264                                                        5703    0.51    0.00  1.0000
   3  11  -3    1167     809                                                        1140   -0.09    0.00  1.0000
   3  11  -2    1202     793                                                        1183   -0.07    0.00  1.0000
   3  11  -1    1887     863                                                        1861   -0.07    0.01  1.0000
   3  11   0       1     724                                                         -14    0.20   -0.01  1.0000
   3  11   1   11830    1599                                                       11905   -0.08    0.01  1.0000
   3  11   2     543     737                                                         584   -0.20    0.00  1.0000
   3  11   3    5342    1250                                                        5607    0.42    0.00  1.0000
   3  12  -8     641     995                                                         625    0.07    0.01  1.0000
   3  12  -7     397     957                                                         413    0.11   -0.01  1.0000
   3  12  -6    5009    1332                                                        4817   -0.32    0.01  1.0000
   3  12  -5    1640    1058                                                        1760    0.34   -0.01  1.0000
   3  12  -4    1965    1054                                                        2007   -0.11    0.01  1.0000
   3  12  -3    5057    1259                                                        5139   -0.13    0.00  1.0000
   3  12  -2    1517     930                                                        1470    0.14    0.00  1.0000
   3  12  -1    2028    1039                                                        2041    0.03    0.00  1.0000
   3  12   0    3752    1098                                                        3690   -0.12    0.00  1.0000
   3  13  -5       1    1116                                                        -133   -0.19    0.00  1.0000
  -4  15  -1    2316    1040                                                        2421    0.25    0.00  1.0000
  -4  15  -2    1606     989                                                        1514   -0.27   -0.01  1.0000
  -4  15  -3    1898     985                                                        1796    0.27    0.01  1.0000
  -4  15  -4     188     783                                                         211   -0.19   -0.01  1.0000
  -4  15  -5     561     723                                                         529    0.16    0.01  1.0000
  -4  15  -6     234     709                                                         189   -0.36   -0.01  1.0000
  -4  15  -7     969     853                                                        1151    0.65    0.01  1.0000
  -4  14   5     189     702                                                         175    0.13    0.01  1.0000
  -4  14   4     404     839                                                         457   -0.30   -0.01  1.0000
  -4  14   3    2373     963                                                        2490    0.28    0.00  1.0000
  -4  14   2     793     784                                                         774   -0.08    0.00  1.0000
  -4  14   1    1414     894                                                        1437   -0.07    0.00  1.0000
  -4  14   0    1078     849                                                        1070    0.03    0.01  1.0000
  -4  14  -1    1032     794                                                        1007    0.10   -0.01  1.0000
  -4  14  -2       1     627                                                         -53   -0.19    0.02  1.0000
  -4  14  -3    2176     868                                                        2285    0.27   -0.02  1.0000
  -4  14  -4     790     801                                                         714   -0.33    0.01  1.0000
  -4  14  -5      16     625                                                           9    0.24   -0.01  1.0000
  -4  14  -6    2846     936                                                        2833    0.03    0.00  1.0000
  -4  14  -7       1     798                                                        -449   -0.25    0.00  1.0000
  -4  13   7      45     754                                                          44   -0.02   -0.01  1.0000
  -4  13   6      87     735                                                         109    0.27    0.01  1.0000
  -4  13   5      85     681                                                         140   -0.60    0.00  1.0000
  -4  13   4    1061     768                                                         847    0.81    0.00  1.0000
  -4  13   3     666     703                                                         829   -0.70    0.01  1.0000
  -4  13   2       4     594                                                         -53    0.44   -0.01  1.0000
  -4  13   1    1843     766                                                        1711   -0.37    0.01  1.0000
  -4  13   0     700     763                                                         837    0.58   -0.01  1.0000
  -4  13  -1    1469     784                                                        1758   -0.84    0.02  1.0000
  -4  13  -2    1377     709                                                        1113    0.88   -0.01  1.0000
  -4  13  -3     236     619                                                         341   -0.71    0.01  1.0000
  -4  13  -4      20     648                                                          41    0.47    0.00  1.0000
  -4  13  -5       1     582                                                         -96   -0.27   -0.01  1.0000
  -4  13  -6      40     600                                                          30    0.20    0.01  1.0000
  -4  13  -7       1     564                                                         -79   -0.24    0.00  1.0000
   4 -13   9       0    1195                                                        -593   -0.05    0.01  1.0000
   4 -13  10       1    1171                                                        -122   -0.23   -0.01  1.0000
  -4  12   7     184     614                                                         142    0.39    0.00  1.0000
  -4  12   6    2677     911                                                        2990   -0.68    0.00  1.0000
  -4  12   5     470     629                                                         660    0.93   -0.01  1.0000
  -4  12   4    1246     753                                                         992   -0.89    0.01  1.0000
  -4  12   3       5     562                                                         -59    0.54   -0.01  1.0000
  -4  12   2      20     573                                                          11   -0.25    0.01  1.0000
  -4  12   1    3120     883                                                        3323    0.42    0.00  1.0000
  -4  12   0      14     629                                                        -117   -0.88    0.00  1.0000
  -4  12  -1    1975     747                                                        1580    1.10    0.00  1.0000
  -4  12  -2     167     523                                                         259   -0.74    0.00  1.0000
  -4  12  -3     734     674                                                         751    0.07    0.01  1.0000
  -4  12  -4     846     647                                                         751    0.39   -0.02  1.0000
  -4  12  -5    1664     772                                                        1798   -0.38    0.01  1.0000
   4 -12   5      30     769                                                          51   -0.38   -0.01  1.0000
  -4  12  -6     530     636                                                         534    0.02   -0.01  1.0000
  -4  12  -7     269     511                                                         225    0.33    0.00  1.0000
  -4  11   7     408     632                                                         307   -0.62    0.01  1.0000
  -4  11   6     510     658                                                         645    0.65   -0.01  1.0000
  -4  11   5    3353     879                                                        3123   -0.47    0.01  1.0000
  -4  11   4    1217     644                                                        1221   -0.01    0.00  1.0000
  -4  11   3   16519    1523                                                       15956    0.51    0.00  1.0000
  -4  11   2    2769     844                                                        2999   -0.50    0.01  1.0000
  -4  11   1    6549    1056                                                        6452   -0.14   -0.01  1.0000
  -4  11   0    5842    1037                                                        6365    0.78    0.01  1.0000
  -4  11  -1     499     598                                                         638   -0.70   -0.01  1.0000
  -4  11  -2    2694     795                                                        2741   -0.11    0.01  1.0000
  -4  11  -3      65     540                                                         138    0.94   -0.01  1.0000
   4 -11   4     230     718                                                         103   -1.16   -0.01  1.0000
  -4  11  -4     181     544                                                          72   -1.16    0.01  1.0000
  -4  11  -5    1878     731                                                        2178    0.77    0.00  1.0000
  -4  11  -6    5840     947                                                        5709   -0.20   -0.01  1.0000
  -4  11  -7    1172     580                                                        1241   -0.23    0.01  1.0000
   4 -11  12       0    1085                                                        -507    0.12    0.01  1.0000
  -4  10  11      27     744                                                          37    0.21   -0.01  1.0000
  -4  10  10     153     670                                                         112   -0.43    0.01  1.0000
  -4  10   9    4680    1040                                                        5033    0.59   -0.01  1.0000
  -4  10   8       7     580                                                        -174   -0.62    0.00  1.0000
  -4  10   7   18409    1603                                                       17860    0.48    0.00  1.0000
  -4  10   6    5910    1016                                                        5978   -0.10    0.00  1.0000
  -4  10   5    8495    1122                                                        8083   -0.53    0.00  1.0000
  -4  10   4   28208    1976                                                       29912    1.16   -0.01  1.0000
  -4  10   3    3631     870                                                        4306   -1.25    0.01  1.0000
  -4  10   2   17090    1483                                                       16508    0.52   -0.01  1.0000
  -4  10   1     427     540                                                         345    0.51    0.01  1.0000
  -4  10   0    1579     683                                                        1933   -0.98    0.00  1.0000
  -4  10  -1      66     449                                                         109    0.60    0.00  1.0000
  -4  10  -2   13661    1334                                                       13783    0.12    0.00  1.0000
  -4  10  -3    2417     681                                                        2210   -0.50    0.00  1.0000
   4 -10   3     148     759                                                         101   -0.50    0.00  1.0000
   4 -10   4       3    1090                                                        -355    0.42    0.00  1.0000
  -4  10  -4   58804    2585                                                       57930    0.42    0.00  1.0000
  -4  10  -5    3967     800                                                        4080   -0.21    0.00  1.0000
  -4  10  -6    6234     931                                                        6266    0.05    0.01  1.0000
  -4  10  -7   17940    1444                                                       18259    0.28    0.00  1.0000
   4 -10   9      52    1423                                                        -277    1.67    0.00  1.0000
   4 -10  10       4    1491                                                          84   -1.68    0.00  1.0000
  -4   9  12       0     787                                                         -34   -0.13    0.00  1.0000
  -4   9  11   22327    2029                                                       22441   -0.09    0.00  1.0000
  -4   9  10    3970     959                                                        3775    0.36    0.00  1.0000
  -4   9   9    5718    1053                                                        5353   -0.58    0.00  1.0000
  -4   9   8   24291    1831                                                       25140    0.63    0.01  1.0000
  -4   9   8   22231    1720                                                       23043    0.63    0.01  1.0000
  -4   9   7       3     518                                                        -207   -0.38   -0.01  1.0000
  -4   9   7     154     499                                                         117   -0.38   -0.01  1.0000
  -4   9   6    4466     811                                                        4595   -0.22    0.00  1.0000
  -4   9   6    5370     925                                                        5511   -0.22    0.00  1.0000
  -4   9   5    4452     827                                                        3971    0.86   -0.01  1.0000
  -4   9   5    4665     704                                                        4172    0.86   -0.01  1.0000
  -4   9   4     508     412                                                         345   -0.94    0.01  1.0000
  -4   9   4     702     564                                                         509   -0.94    0.01  1.0000
  -4   9   3       0     477                                                         -56    0.14   -0.01  1.0000
  -4   9   2   36943    2078                                                       38656    1.03    0.00  1.0000
  -4   9   1    1506     578                                                        1010   -1.66    0.01  1.0000
  -4   9   0   36280    1929                                                       33859    1.51   -0.01  1.0000
  -4   9  -1   35799    2014                                                       37724   -1.17    0.01  1.0000
  -4   9  -2     420     470                                                         243    1.20    0.00  1.0000
  -4   9  -3  100696    3136                                                       97002   -1.36    0.00  1.0000
  -4   9  -4     270     457                                                         436    1.05    0.00  1.0000
  -4   9  -5    7252     944                                                        7450   -0.27   -0.01  1.0000
  -4   9  -6     486     435                                                         522   -0.20    0.01  1.0000
  -4   9  -7    2254     611                                                        2382   -0.31   -0.01  1.0000
   4  -9   9      95    2021                                                        -333   -2.26    0.01  1.0000
   4  -9  13     241    1681                                                         439    1.26    0.00  1.0000
  -4   8  13    7875    1390                                                        7475   -0.53    0.01  1.0000
  -4   8  12    6612    1304                                                        6922    0.44    0.00  1.0000
  -4   8  11      90     607                                                         102   -0.15    0.00  1.0000
  -4   8  10       1     570                                                        -160   -0.28    0.00  1.0000
  -4   8   9   10705    1290                                                       10041    0.76    0.01  1.0000
  -4   8   8    6887    1048                                                        7645   -1.03    0.00  1.0000
  -4   8   8    6547     992                                                        7287   -1.03    0.00  1.0000
  -4   8   7    2723     723                                                        3109    0.83    0.00  1.0000
  -4   8   7    2424     702                                                        2789    0.83    0.00  1.0000
  -4   8   6   34032    1834                                                       33532   -0.32    0.00  1.0000
  -4   8   6   29972    1798                                                       29502   -0.32    0.00  1.0000
  -4   8   5     746     491                                                         796    0.22    0.00  1.0000
  -4   8   5     782     432                                                         834    0.22    0.00  1.0000
  -4   8   4    8117     860                                                        8929   -1.04    0.00  1.0000
  -4   8   4    9025    1089                                                        9881   -1.04    0.00  1.0000
  -4   8   3   16670     986                                                       14345    2.19    0.00  1.0000
  -4   8   3   17686    1285                                                       15288    2.19    0.00  1.0000
  -4   8   2    5788     781                                                        4304   -2.46    0.01  1.0000
  -4   8   2    4317     450                                                        3050   -2.46    0.01  1.0000
  -4   8   1   64824    2586                                                       68287    1.56   -0.01  1.0000
  -4   8   0   16031    1264                                                       15275   -0.70    0.01  1.0000
  -4   8  -1    1553     503                                                        1220    1.05    0.00  1.0000
  -4   8  -2    6564     950                                                        8117   -2.11   -0.01  1.0000
   4  -8   2      83    1360                                                        -240   -2.11    0.01  1.0000
  -4   8  -3   24430    1440                                                       21498    2.25    0.01  1.0000
   4  -8   3      94    1406                                                        -325    2.25   -0.01  1.0000
   4  -8   4      14    1554                                                        -249   -0.87    0.02  1.0000
  -4   8  -4    6337     804                                                        5754   -0.87   -0.02  1.0000
   4  -8   5     350    1829                                                         238   -0.77   -0.02  1.0000
  -4   8  -5   19091    1313                                                       18197   -0.77    0.02  1.0000
  -4   8  -6    2130     580                                                        2546    1.02   -0.02  1.0000
  -4   8  -7     875     411                                                         821    0.29    0.01  1.0000
   4  -8  12      14    2132                                                        -712    0.85    0.00  1.0000
   4  -8  14       1    2109                                                        -701    0.26   -0.01  1.0000
  -4   7  13      44     684                                                          85    0.68    0.00  1.0000
  -4   7  12    1887     871                                                        2085   -0.52    0.00  1.0000
  -4   7  11     869     676                                                         836    0.13    0.00  1.0000
  -4   7  10    9461    1338                                                        9918    0.54    0.00  1.0000
  -4   7   9   12255    1295                                                       11035   -1.32    0.00  1.0000
  -4   7   8   17107    1433                                                       15264    1.69   -0.01  1.0000
  -4   7   8   15797    1241                                                       14028    1.69   -0.01  1.0000
  -4   7   7   24573    1768                                                       26542   -1.44    0.01  1.0000
  -4   7   7   24460    1629                                                       26425   -1.44    0.01  1.0000
  -4   7   6    8225     986                                                        9146    1.15   -0.01  1.0000
  -4   7   6    7646     964                                                        8536    1.15   -0.01  1.0000
  -4   7   5   14554    1080                                                       12853   -1.70    0.01  1.0000
  -4   7   5   14485    1150                                                       12788   -1.70    0.01  1.0000
  -4   7   4   10154     809                                                        7897    2.76    0.00  1.0000
  -4   7   4    9836     909                                                        7616    2.76    0.00  1.0000
  -4   7   3     645     385                                                        1379   -2.74    0.00  1.0000
  -4   7   3     941     526                                                        1799   -2.74    0.00  1.0000
  -4   7   2     787     401                                                         638    0.66    0.00  1.0000
  -4   7   2     717     262                                                         574    0.66    0.00  1.0000
  -4   7   1    3227     341                                                        2309    2.05    0.00  1.0000
  -4   7   1    3761     596                                                        2764    2.05    0.00  1.0000
  -4   7   0     233     372                                                         550   -2.79    0.01  1.0000
  -4   7   0     341     184                                                         727   -2.79    0.01  1.0000
  -4   7  -1   11661     448                                                       12635    1.03   -0.01  1.0000
  -4   7  -1   11707    1092                                                       12682    1.03   -0.01  1.0000
  -4   7  -2   47454    2040                                                       49091    0.86    0.01  1.0000
  -4   7  -3   33208    1697                                                       34078   -0.55   -0.01  1.0000
[truncated: 425,365 more chars]
